# Supplementary material
Source: PubMed Central journal article supplement (PMC8274693)
Supplement: ehp7381.s001.acco.pdf [file ehp7381.s001.acco.pdf]

**Note to readers with disabilities:** *EHP* strives to ensure that all journal content is accessible to all readers. However, some figures and Supplemental Material published in *EHP* articles may not conform to [508 standards](#) due to the complexity of the information being presented. If you need assistance accessing journal content, please contact [ehp508@niehs.nih.gov](mailto:ehp508@niehs.nih.gov). Our staff will work with you to assess and meet your accessibility needs within 3 working days.

### **Supplemental Material**

#### **Health Effects of Naphthalene Exposure: A Systematic Evidence Map and Analysis of Potential Considerations for Dose–Response Evaluation**

Erin E. Yost, Audrey Galizia, Dustin F. Kapraun, Amanda S. Persad, Suryanarayana V. Vulimiri, Michelle Angrish, Janice S. Lee, and Ingrid L. Druwe

#### **Table of Contents**

##### **Survey of existing reference values for naphthalene**

**Table S1.** Sources searched for naphthalene health effect reference values.

##### **Literature search and screening**

**Table S2.** Database search strategy.

**Table S3.** Processes used to augment the search of core databases for naphthalene.

**Table S4.** Electronic screening inclusion terms for naphthalene (listed alphabetically by organ/health system).

##### **Study evaluation methods**

**Table S5.** Questions to guide the development of criteria for each domain in epidemiology studies.

**Table S6.** Information relevant to evaluation domains for epidemiology studies.

**Table S7.** Questions to guide the development of criteria for each domain in experimental animal toxicology studies.

##### **Epidemiology studies reporting on other health systems**

**Table S8.** Summary of eight human studies that did not report any of the health systems selected for further evaluation. These studies did not undergo study evaluation.

### **Appendix: Reference Values Identified for Naphthalene**

**Table A1.** Details on derivation of the available health effect reference values for inhalation exposure to naphthalene (from Figure 1 of the main text) (continued on following pages).

**Table A2.** Details on derivation of the available health effect reference values for oral exposure to naphthalene (from Figure 2 of the main text).

**Table A3.** Details on additional inhalation values based on another agency's values or lacking derivation descriptions (continued on following pages).

### **References**

**Additional File-** Excel Document

# 1. Survey of existing reference values for naphthalene

**Table S1: Sources searched for naphthalene health effect reference values**

| Source                                                                                                                       | Search Results                 | Reference                        |
|------------------------------------------------------------------------------------------------------------------------------|--------------------------------|----------------------------------|
| American Conference of Governmental Industrial Hygienists (ACGIH)                                                            | See Appendix Table A1.         | ACGIH (2007)                     |
| American Industrial Hygiene Association (AIHA)                                                                               | No search results found        | AIHA (2016)                      |
| Agency for Toxic Substances and Disease Registry (ATSDR)                                                                     | See Appendix Tables A1 and A2. | ATSDR (2021b)<br>ATSDR (2021a)   |
| California Environmental Protection Agency (CalEPA)                                                                          | See Appendix Table A1.         | CalEPA (2021)                    |
| Connecticut Department of Energy & Environmental Protection (CT DEEP)                                                        | See Appendix Tables A1 and A2. | CT DEEP (2015)<br>CT DEEP (2018) |
| <i>Deutsche Forschungsgemeinschaft</i> , German Research Foundation (DFG)                                                    | No search results found        | DFG (2020)                       |
| Drinking Water Standards and Health Advisories (DWSHA)                                                                       | See Appendix Table A2.         | U.S. EPA (2018a)                 |
| Acute Exposure Level Guidelines from the U.S. Environmental Protection Agency and National Research Council) (EPA/NRC AEGLE) | No search results found        | U.S. EPA (2018b)                 |
| Health Canada                                                                                                                | See Appendix Table A1.         | Government of Canada (2021)      |
|                                                                                                                              | No values found                | Health Canada (2020)             |
|                                                                                                                              | No values found                | Health Canada (1996)             |
| Health and Safety Authority (HSA)                                                                                            | See Appendix Table A1.         | HSA (2020)                       |
| Health and Safety Laboratory (HSL)                                                                                           | No values found                | HSL (2002)                       |
| Indiana Department of Environmental Management (IDEM)                                                                        | See Appendix Table A1.         | IDEM (2019)                      |
| Idaho Department of Environmental Quality (ID DEQ)                                                                           | See Appendix Table A3.         | Idaho DEQ (2019)                 |
| <i>Institut für Arbeitsschutz</i> , <i>The Institute for Occupational Safety and Health</i> (IFA)                            | See Appendix Table A3.         | IFA (2020)                       |
| Integrated Risk Information System (IRIS)                                                                                    | See Appendix Tables A1 and A2. | U.S. EPA (2021a)                 |

| Source                                                                                                                        | Search Results                 | Reference                                     |
|-------------------------------------------------------------------------------------------------------------------------------|--------------------------------|-----------------------------------------------|
| International Toxicity Estimates for Risk (ITER)                                                                              | No unique search results found | TERA (2021)                                   |
| Japan Society for Occupational Health (JSOH)                                                                                  | No values found                | JSOH (2017)                                   |
| Massachusetts Department of Environmental Protection (MassDEP)                                                                | See Appendix Table A3.         | MassDEP (2019)                                |
| Minnesota Department of Health (MDH)                                                                                          | See Appendix Table A1.         | MDH (2019)                                    |
| Michigan Department of Environment, Great Lakes & Energy (MI EGLE)                                                            | See Appendix Tables A1 and A2. | Michigan DEQ (2016)                           |
| National Air Toxics Information Clearinghouse (NATICH)                                                                        | See Appendix Tables A1 and A3. | U.S. EPA (1993)                               |
| North Carolina Department of Environmental Quality (NC DEQ)                                                                   | No values found                | NC Department of Environmental Quality (2014) |
| Nevada Division of Environmental Protection (NDEP)                                                                            | See Appendix Table A1.         | NDEP (2017)                                   |
| National Institute for Occupational Safety and Health (NIOSH)                                                                 | See Appendix Table A1.         | NIOSH (2019)                                  |
| New Jersey Department of Environmental Protection (NJ DEP)                                                                    | See Appendix Table A1.         | NJ DEP (2020)                                 |
| New York State Department of Environmental Conservation (NY DEC)                                                              | See Appendix Tables A1 and A2. | NYSDEC (2006)                                 |
| Office of Air Quality Planning and Standards (OAQPS)                                                                          | No unique search results found | U.S. EPA (2020)                               |
| Ontario Ministry of Labour                                                                                                    | See Appendix Table A1.         | Ontario Ministry of Labour (2020)             |
| Office of Pesticide Programs (OPP)                                                                                            | See Appendix Table A2.         | U.S. EPA (2021b)                              |
| Oregon Department of Environmental Quality (OR DEQ)                                                                           | See Appendix Table A1.         | Oregon DEQ (2018)                             |
| Occupational Safety and Health Administration (OSHA)                                                                          | See Appendix Table A1.         | OSHA (2019)                                   |
|                                                                                                                               |                                | OSHA (2020a)                                  |
|                                                                                                                               |                                | OSHA (2020b)                                  |
| Protective Action Criteria (PAC) Database                                                                                     | See Appendix Table A1.         | DOE (2018)                                    |
| Publications Quebec                                                                                                           | See Appendix Table A1.         | Légis Québec (2020)                           |
| Rhode Island Department of Environmental Management (RI DEM)                                                                  | See Appendix Table A1.         | RI DEM (2008)                                 |
| <i>Rijksinstituut voor Volksgezondheid en Milieu (RIVM)</i> , The Netherlands Institute for Public Health and the Environment | No values found                | Tiesjema and Baars (2009)                     |
|                                                                                                                               | See Appendix Table A1.         | Dusseldorp et al. (2011)                      |
|                                                                                                                               | No values found                | RIVM (2001)                                   |

| <b>Source</b>                                             | <b>Search Results</b>          | <b>Reference</b>                    |
|-----------------------------------------------------------|--------------------------------|-------------------------------------|
| Safe Work Australia                                       | See Appendix Table A1.         | Safe Work Australia (2019)          |
| Southwest Clean Air Association (SWCAA)                   | See Appendix Table A3.         | SWCAA (2021)                        |
| Texas Commission on Environmental Quality (TCEQ)          | No values found                | TCEQ (2020)                         |
|                                                           | See Appendix Tables A1 and A2. | TCEQ (2018)                         |
| United States Army Public Health Center (USAPHC)          | See Appendix Table A3.         | U.S. APHC (2013)                    |
| Vermont Department of Environmental Conservation (VT DEC) | See Appendix Table A3.         | VT ANR (2018)                       |
| Washington State Dept. of Ecology                         | See Appendix Table A3.         | Washington State Legislature (2009) |
| Worksafe                                                  | See Appendix Table A1.         | Worksafe (2018)                     |
| World Health Organization (WHO)                           | No values found                | WHO (2017)                          |
|                                                           |                                | WHO (2021)                          |

## 2. Literature search and screening

**Table S2. Database search strategy**

| Database      | Search Date | Query String                                                                                                                                                                                                                                                                                                                                                                                                                                                                                                                                                                                                                                                                                                                                                                                                                                                                                                                             |
|---------------|-------------|------------------------------------------------------------------------------------------------------------------------------------------------------------------------------------------------------------------------------------------------------------------------------------------------------------------------------------------------------------------------------------------------------------------------------------------------------------------------------------------------------------------------------------------------------------------------------------------------------------------------------------------------------------------------------------------------------------------------------------------------------------------------------------------------------------------------------------------------------------------------------------------------------------------------------------------|
| <b>PubMed</b> |             |                                                                                                                                                                                                                                                                                                                                                                                                                                                                                                                                                                                                                                                                                                                                                                                                                                                                                                                                          |
| 1/28/2021     |             | ("naphthalene"[nm] AND 2018/12/01 : 2021/01/31[mhda]) OR (("naphthalene"[tw] OR "albicarbon"[tw] OR "naphthalin"[tw] OR "naphthaline"[tw] OR "naphthene"[tw] OR "naphtalene"[tw] OR "camphor tar"[tw] OR "tar camphor"[tw] OR "white tar"[tw] OR "moth balls"[tw] OR "moth flakes"[tw] OR "mothballs"[tw] OR "Naphtalinum"[tw] OR "Naphthalinum"[tw] OR "Dezodorator"[tw] OR "Mighty 150"[tw] OR "Mighty RD1"[tw]) AND "Naphthalenes"[mh:noexp] AND 2018/12/01 : 2021/01/31 [mhda]) OR (((("naphthalene"[tw] OR "albicarbon"[tw] OR "naphthalin"[tw] OR "naphthaline"[tw] OR "naphthene"[tw] OR "naphtalene"[tw] OR "camphor tar"[tw] OR "tar camphor"[tw] OR "white tar"[tw] OR "moth balls"[tw] OR "moth flakes"[tw] OR "mothballs"[tw] OR "Naphtalinum"[tw] OR "Naphthalinum"[tw] OR "Dezodorator"[tw] OR "Mighty 150"[tw] OR "Mighty RD1"[tw]) AND (2018/12/01 : 2021/01/31[edat] OR 2018/12/01 2021/01/31[crdt])) NOT medline[sb])  |
| 2/8/2019      |             | ("naphthalene"[nm] AND 2017/10/01 : 2019/01/01[mhda]) OR (("naphthalene"[tw] OR "albicarbon"[tw] OR "naphthalin"[tw] OR "naphthaline"[tw] OR "naphthene"[tw] OR "naphtalene"[tw] OR "camphor tar"[tw] OR "tar camphor"[tw] OR "white tar"[tw] OR "moth balls"[tw] OR "moth flakes"[tw] OR "mothballs"[tw] OR "Naphtalinum"[tw] OR "Naphthalinum"[tw] OR "Dezodorator"[tw] OR "Mighty 150"[tw] OR "Mighty RD1"[tw]) AND "Naphthalenes"[mh:noexp] AND 2017/10/01 : 2019/01/01[mhda]) OR (((("naphthalene"[tw] OR "albicarbon"[tw] OR "naphthalin"[tw] OR "naphthaline"[tw] OR "naphthene"[tw] OR "naphtalene"[tw] OR "camphor tar"[tw] OR "tar camphor"[tw] OR "white tar"[tw] OR "moth balls"[tw] OR "moth flakes"[tw] OR "mothballs"[tw] OR "Naphtalinum"[tw] OR "Naphthalinum"[tw] OR "Dezodorator"[tw] OR "Mighty 150"[tw] OR "Mighty RD1"[tw]) AND (2017/10/01 : 2019/01/01[edat] OR 2017/10/01 : 2019/01/01[crdt])) NOT medline[sb]) |
| 9/29/2017     |             | ("naphthalene"[nm] AND 2017/02/01 : 3000[mhda]) OR (((("naphthalene"[tw] OR "albicarbon"[tw] OR "naphthalin"[tw] OR "naphthaline"[tw] OR "naphthene"[tw] OR "naphtalene"[tw] OR "camphor tar"[tw] OR "tar camphor"[tw] OR "white tar"[tw] OR "moth balls"[tw] OR "moth flakes"[tw] OR "mothballs"[tw] OR "Naphtalinum"[tw] OR "Naphthalinum"[tw] OR "Dezodorator"[tw] OR "Mighty 150"[tw] OR "Mighty RD1"[tw]) AND "Naphthalenes"[mh:noexp] AND 2017/02/01 : 3000[mhda]) OR (((("naphthalene"[tw] OR "albicarbon"[tw] OR "naphthalin"[tw] OR "naphthaline"[tw] OR "naphthene"[tw] OR "naphtalene"[tw] OR "camphor tar"[tw] OR "tar camphor"[tw] OR "white tar"[tw] OR "moth balls"[tw] OR "moth flakes"[tw] OR "mothballs"[tw] OR "Naphtalinum"[tw] OR "Naphthalinum"[tw] OR "Dezodorator"[tw] OR "Mighty 150"[tw] OR "Mighty RD1"[tw]) AND (2014/10/01 : 3000[edat] OR 2017/02/01 : 3000[crdt])) NOT medline[sb])                       |

| Database    |                                                                                                                                                                                                                                                                                                                                                                                                                                                                                                                                                                                                                                                                                                                                                                                                                                                                                                                                                                                                                                                                                                                                                                                                                                                                                                                                                                                                                                                                                                                                                                                                                                                                                      |
|-------------|--------------------------------------------------------------------------------------------------------------------------------------------------------------------------------------------------------------------------------------------------------------------------------------------------------------------------------------------------------------------------------------------------------------------------------------------------------------------------------------------------------------------------------------------------------------------------------------------------------------------------------------------------------------------------------------------------------------------------------------------------------------------------------------------------------------------------------------------------------------------------------------------------------------------------------------------------------------------------------------------------------------------------------------------------------------------------------------------------------------------------------------------------------------------------------------------------------------------------------------------------------------------------------------------------------------------------------------------------------------------------------------------------------------------------------------------------------------------------------------------------------------------------------------------------------------------------------------------------------------------------------------------------------------------------------------|
| Search Date | Query String                                                                                                                                                                                                                                                                                                                                                                                                                                                                                                                                                                                                                                                                                                                                                                                                                                                                                                                                                                                                                                                                                                                                                                                                                                                                                                                                                                                                                                                                                                                                                                                                                                                                         |
| 01/04/2017  | <p>((524-42-5[rn] OR 130-15-4[rn] OR 7234-04-0[rn] OR 277-50-9[rn]) OR (("1,2-Dihydro-1,2-diketonaphthalene"[tw] OR "1,2-Naphthalenedione"[tw] OR "1,2-Naphtaquinone"[tw] OR "beta-Napthoquinone"[tw] OR "o-Napthoquinone"[tw] OR "1,4-Dihydro-1,4-diketonaphthalene"[tw] OR "1,4-Naphthalenedione"[tw] OR "1,4-Napthoquinone"[tw] OR "1,4-Napthylquinone"[tw] OR "alpha-Napthoquinone"[tw] OR "p-Napthoquinone"[tw] OR "1,2-Dihydronaphthalene-1,2-diol"[tw] OR "1,2-Dihydroxy-1,2-dihydronaphthalene"[tw] OR "1,2-dihydro-1,2-Naphthalenediol"[tw] OR "Naphthalene-1,2-dihydrodiol"[tw] OR "trans-1,2-Dihydroxy-1,2-dihydronaphthalene"[tw] OR "Naphthalene 1,2-oxide"[tw] OR "Naphthalene oxide"[tw] OR "Naphth(1,2-b)oxirene"[tw]) NOT medline[sb])) OR (("naphthalene"[nm] AND 2015/10/01 : 3000[mhda]) OR (("naphthalene"[tw] OR "albo carbon"[tw] OR "naphthalin"[tw] OR "naphthaline"[tw] OR "naphthene"[tw] OR "naphtalene"[tw] OR "camphor tar"[tw] OR "tar camphor"[tw] OR "white tar"[tw] OR "moth balls"[tw] OR "moth flakes"[tw] OR "mothballs"[tw] OR "Naphtalinum"[tw] OR "Naphthalinum"[tw] OR "Dezodorator"[tw] OR "Mighty 150"[tw] OR "Mighty RD1"[tw]) AND "Naphthalenes"[mh:noexp] AND 2015/10/01 : 3000[mhda]) OR (((("naphthalene"[tw] OR "albo carbon"[tw] OR "naphthalin"[tw] OR "naphthaline"[tw] OR "naphthene"[tw] OR "naphtalene"[tw] OR "camphor tar"[tw] OR "tar camphor"[tw] OR "white tar"[tw] OR "moth balls"[tw] OR "moth flakes"[tw] OR "mothballs"[tw] OR "Naphtalinum"[tw] OR "Naphthalinum"[tw] OR "Dezodorator"[tw] OR "Mighty 150"[tw] OR "Mighty RD1"[tw]) AND (2015/10/01 : 3000[edat] OR 2015/10/01 : 3000[crdt])) NOT medline[sb]))</p> |
| 11/06/2015  | <p>("naphthalene"[nm] AND 2014/10/01 : 3000[mhda]) OR (("naphthalene"[tw] OR "albo carbon"[tw] OR "naphthalin"[tw] OR "naphthaline"[tw] OR "naphthene"[tw] OR "naphtalene"[tw] OR "camphor tar"[tw] OR "tar camphor"[tw] OR "white tar"[tw] OR "moth balls"[tw] OR "moth flakes"[tw] OR "mothballs"[tw] OR "Naphtalinum"[tw] OR "Naphthalinum"[tw] OR "Dezodorator"[tw] OR "Mighty 150"[tw] OR "Mighty RD1"[tw]) AND "Naphthalenes"[mh:noexp] AND 2014/10/01 : 3000[mhda]) OR (((("naphthalene"[tw] OR "albo carbon"[tw] OR "naphthalin"[tw] OR "naphthaline"[tw] OR "naphthene"[tw] OR "naphtalene"[tw] OR "camphor tar"[tw] OR "tar camphor"[tw] OR "white tar"[tw] OR "moth balls"[tw] OR "moth flakes"[tw] OR "mothballs"[tw] OR "Naphtalinum"[tw] OR "Naphthalinum"[tw] OR "Dezodorator"[tw] OR "Mighty 150"[tw] OR "Mighty RD1"[tw]) AND (2014/10/01 : 3000[edat] OR 2014/10/01 : 3000[crdt])) NOT medline[sb])</p>                                                                                                                                                                                                                                                                                                                                                                                                                                                                                                                                                                                                                                                                                                                                                            |
| 12/16/2014  | <p>("naphthalene"[nm] AND 2012/12/01 : 3000[mhda]) OR ("Naphthalenes"[mh:noexp] AND ("91-20-3"[tw] OR "naphthalene"[tw] OR "albo carbon"[tw] OR "naphthalin"[tw] OR "naphthaline"[tw] OR "naphthene"[tw] OR "naphtalene"[tw] OR "camphor tar"[tw] OR "tar camphor"[tw] OR "white tar"[tw] OR "moth balls"[tw] OR "moth flakes"[tw] OR "mothballs"[tw] OR "Naphtalinum"[tw] OR "Naphthalinum"[tw] OR "Dezodorator"[tw] OR "Mighty 150"[tw] OR "Mighty RD1"[tw]) AND 2012/12/01 : 3000[mhda]) OR (((("91-20-3"[tw] OR "naphthalene"[tw] OR "albo carbon"[tw] OR "naphthalin"[tw] OR "naphthaline"[tw] OR "naphthene"[tw] OR "naphtalene"[tw] OR "camphor tar"[tw] OR "tar camphor"[tw] OR "white tar"[tw] OR "moth balls"[tw] OR "moth flakes"[tw] OR "mothballs"[tw] OR "Naphtalinum"[tw] OR "Naphthalinum"[tw] OR "Dezodorator"[tw] OR "Mighty 150"[tw] OR "Mighty RD1"[tw]) AND (2012/12/01 : 3000[crdat] OR 2012/12/01 : 3000[edat])) NOT medline[sb])</p>                                                                                                                                                                                                                                                                                                                                                                                                                                                                                                                                                                                                                                                                                                                         |

| Database              |                                                                                                                                                                                                                                                                                                                                                                                                                                                                                                                                                                                                                                                                                                                                                                                                                                                                                                                                                                                                                                                                                                                                                                                                                                                                                                                                                                                                                                                                                                                                                                                                                                                                                                                                                                                                                                                                                                                                                                                                                                                                                                                                                                                                                                                                                                                                                                                                                                                                                                                                                                                                                                                                                                                                                                                                                                   |
|-----------------------|-----------------------------------------------------------------------------------------------------------------------------------------------------------------------------------------------------------------------------------------------------------------------------------------------------------------------------------------------------------------------------------------------------------------------------------------------------------------------------------------------------------------------------------------------------------------------------------------------------------------------------------------------------------------------------------------------------------------------------------------------------------------------------------------------------------------------------------------------------------------------------------------------------------------------------------------------------------------------------------------------------------------------------------------------------------------------------------------------------------------------------------------------------------------------------------------------------------------------------------------------------------------------------------------------------------------------------------------------------------------------------------------------------------------------------------------------------------------------------------------------------------------------------------------------------------------------------------------------------------------------------------------------------------------------------------------------------------------------------------------------------------------------------------------------------------------------------------------------------------------------------------------------------------------------------------------------------------------------------------------------------------------------------------------------------------------------------------------------------------------------------------------------------------------------------------------------------------------------------------------------------------------------------------------------------------------------------------------------------------------------------------------------------------------------------------------------------------------------------------------------------------------------------------------------------------------------------------------------------------------------------------------------------------------------------------------------------------------------------------------------------------------------------------------------------------------------------------|
| Search Date           | Query String                                                                                                                                                                                                                                                                                                                                                                                                                                                                                                                                                                                                                                                                                                                                                                                                                                                                                                                                                                                                                                                                                                                                                                                                                                                                                                                                                                                                                                                                                                                                                                                                                                                                                                                                                                                                                                                                                                                                                                                                                                                                                                                                                                                                                                                                                                                                                                                                                                                                                                                                                                                                                                                                                                                                                                                                                      |
| 02/17/2013            | <p>(((91-20-3[rn]) OR ((91-20-3[tw] OR naphthalene[tw] OR albocarbon[tw] OR naphthalin[tw] OR naphthaline[tw] OR naphthene[tw] OR naphtalene[tw] OR "camph[tw] OR tar[tw] OR "tar camphor"[tw] OR "white tar"[tw] OR "moth balls"[tw] OR "moth flakes"[tw] OR mothballs[tw]) AND ("naphthalenes"[mh:noexp]))) AND (("naphthalenes/toxicity"[MeSH Terms] OR "naphthalenes/adverse effects"[MeSH Terms] OR "naphthalenes/poisoning"[MeSH Terms] OR "naphthalenes/pharmacokinetics"[MeSH Terms]) OR ("naphthalenes/blood"[MeSH Terms] OR "naphthalenes/cerebrospinal fluid"[MeSH Terms] OR "naphthalenes/urine"[MeSH Terms]) OR ("naphthalenes/metabolism"[MeSH Terms] AND ("humans"[MeSH Terms] OR "animals"[MeSH Terms])) OR ("naphthalenes/antagonists and inhibitors"[MeSH Terms]) OR ("chemically induced"[MeSH Subheading] OR "environmental exposure"[MeSH Terms]) OR ("endocrine system"[mh] OR "hormones, hormone substitutes, and hormone antagonists"[mh] OR "endocrine disruptors"[mh]) OR (cancer[sb]) OR ("Computational biology"[mh] OR "Medical Informatics"[mh] OR Genomics[mh] OR Genome[mh] OR Proteomics[mh] OR Proteome[mh] OR Metabolomics[mh] OR Metabolome[mh] OR Genes[mh] OR "Gene expression"[mh] OR Phenotype[mh] OR genetics[mh] OR genotype[mh] OR Transcriptome[mh] OR ("Systems Biology"[mh] AND ("Environmental Exposure"[mh] OR "Epidemiological Monitoring"[mh] OR analysis[sh])) OR "Transcription, Genetic "[mh] OR "Reverse transcription"[mh] OR "Transcriptional activation"[mh] OR "Transcription factors"[mh] OR ("biosynthesis"[sh] AND (RNA[mh] OR DNA[mh])) OR "RNA, Messenger "[mh] OR "RNA, Transfer"[mh] OR "peptide biosynthesis"[mh] OR "protein biosynthesis"[mh] OR "Reverse Transcriptase Polymerase Chain Reaction"[mh] OR "Base Sequence"[mh] OR "Trans-activators"[mh] OR "Gene Expression Profiling"[mh]) OR (rat[tw] OR rats[tw] OR mouse[tw] OR mice[tw] OR muridae[tw] OR rabbit[tw] OR rabbits[tw] OR hamster[tw] OR hamsters[tw] OR ferret[tw] OR ferrets[tw] OR gerbil[tw] OR gerbils[tw] OR rodent[tw] OR rodents[tw] OR rodentia[tw] OR dog[tw] OR dogs[tw] OR beagle[tw] OR beagles[tw] OR canine[tw] OR cats[tw] OR feline[tw] OR pig[tw] OR pigs[tw] OR swine[tw] OR porcine[tw] OR monkey[tw] OR monkeys[tw] OR macaque[tw] OR macaques[tw] OR baboon[tw] OR baboons[tw] OR marmoset[tw] OR marmosets[tw] OR "animals, laboratory"[mh]) OR (((pharmacokinetics[mh] OR metabolism[mh]) AND (humans[mh] OR animals[mh])) OR "dose-response relationship, drug"[mh] OR risk[mh])))) OR ((91-20-3[tw] OR naphthalene[tw] OR albocarbon[tw] OR naphthalin[tw] OR naphthaline[tw] OR naphthene[tw] OR naphtalene[tw] OR "camph[tw] OR tar[tw] OR "tar camphor"[tw] OR "white tar"[tw] OR "moth balls"[tw] OR "moth flakes"[tw] OR mothballs[tw]) NOT medline[sb])</p> |
| <b>Web of Science</b> |                                                                                                                                                                                                                                                                                                                                                                                                                                                                                                                                                                                                                                                                                                                                                                                                                                                                                                                                                                                                                                                                                                                                                                                                                                                                                                                                                                                                                                                                                                                                                                                                                                                                                                                                                                                                                                                                                                                                                                                                                                                                                                                                                                                                                                                                                                                                                                                                                                                                                                                                                                                                                                                                                                                                                                                                                                   |
| 1/28/2021             | <p>(TS="naphthalene" OR TS="albocarbon" OR TS="naphthalin" OR TS="naphthaline" OR TS="naphthene" OR TS="naphtalene" OR TS="camphor tar" OR TS="tar camphor" OR TS="white tar" OR TS="moth balls" OR TS="moth flakes" OR TS="mothballs" OR TS="Naphtalinum" OR TS="Naphthalinum" OR TS="Dezodorator" OR TS="Mighty 150" OR TS="Mighty RD1") AND ((WC=("Toxicology" OR "Endocrinology &amp; Metabolism" OR "Gastroenterology &amp; Hepatology" OR "Gastroenterology &amp; Hepatology" OR "Hematology" OR "Neurosciences" OR "Obstetrics &amp; Gynecology" OR "Pharmacology &amp; Pharmacy" OR "Physiology" OR "Respiratory System" OR "Urology &amp; Nephrology" OR "Anatomy &amp; Morphology" OR "Andrology" OR "Pathology" OR "Veterinary Sciences" OR "Otorhinolaryngology" OR "Ophthalmology" OR "Pediatrics" OR "Oncology" OR "Reproductive Biology" OR "Developmental Biology" OR "Biology" OR</p>                                                                                                                                                                                                                                                                                                                                                                                                                                                                                                                                                                                                                                                                                                                                                                                                                                                                                                                                                                                                                                                                                                                                                                                                                                                                                                                                                                                                                                                                                                                                                                                                                                                                                                                                                                                                                                                                                                                            |



| Database<br>Search Date | Query String                                                                                                                                                                                                                                                                                                                                                                                                                                                                                                                                                                                                                                                                                                                                                                                                                                                                                                                                                                                                                                                                                                                                                                                                                                                                                                                                                                                                                                                                                                                                                                                                                                                                                                                                                                                                                                                                                                                                                                                                                                                                                                                                                                                                      |
|-------------------------|-------------------------------------------------------------------------------------------------------------------------------------------------------------------------------------------------------------------------------------------------------------------------------------------------------------------------------------------------------------------------------------------------------------------------------------------------------------------------------------------------------------------------------------------------------------------------------------------------------------------------------------------------------------------------------------------------------------------------------------------------------------------------------------------------------------------------------------------------------------------------------------------------------------------------------------------------------------------------------------------------------------------------------------------------------------------------------------------------------------------------------------------------------------------------------------------------------------------------------------------------------------------------------------------------------------------------------------------------------------------------------------------------------------------------------------------------------------------------------------------------------------------------------------------------------------------------------------------------------------------------------------------------------------------------------------------------------------------------------------------------------------------------------------------------------------------------------------------------------------------------------------------------------------------------------------------------------------------------------------------------------------------------------------------------------------------------------------------------------------------------------------------------------------------------------------------------------------------|
|                         | <p>"Dermatology" OR "Allergy" OR "Public, Environmental &amp; Occupational Health") OR SU=("Anatomy &amp; Morphology" OR "Cardiovascular System &amp; Cardiology" OR "Developmental Biology" OR "Endocrinology &amp; Metabolism" OR "Gastroenterology &amp; Hepatology" OR "Hematology" OR "Immunology" OR "Neurosciences &amp; Neurology" OR "Obstetrics &amp; Gynecology" OR "Oncology" OR "Ophthalmology" OR "Pathology" OR "Pediatrics" OR "Pharmacology &amp; Pharmacy" OR "Physiology" OR "Public, Environmental &amp; Occupational Health" OR "Respiratory System" OR "Toxicology" OR "Urology &amp; Nephrology" OR "Reproductive Biology" OR "Dermatology" OR "Allergy")) AND (TS="rat" OR TS="rats" OR TS="mouse" OR TS="murine" OR TS="mice" OR TS="guinea" OR TS="muridae" OR TS=rabbit* OR TS=lagomorph* OR TS=hamster* OR TS=ferret* OR TS=gerbil* OR TS=rodent* OR TS="dog" OR TS="dogs" OR TS=beagle* OR TS="canine" OR TS="cats" OR TS="feline" OR TS="pig" OR TS="pigs" OR TS="swine" OR TS="porcine" OR TS=monkey* OR TS=macaque* OR TS=baboon* OR TS=marmoset* OR TS=toxic*) AND (TS="rat" OR TS="rats" OR TS="mouse" OR TS="murine" OR TS="mice" OR TS="guinea" OR TS="muridae" OR TS=rabbit* OR TS=lagomorph* OR TS=hamster* OR TS=ferret* OR TS=gerbil* OR TS=rodent* OR TS="dog" OR TS="dogs" OR TS=beagle* OR TS="canine" OR TS="cats" OR TS="feline" OR TS="pig" OR TS="pigs" OR TS="swine" OR TS="porcine" OR TS=monkey* OR TS=macaque* OR TS=baboon* OR TS=marmoset*) OR (TS="child" OR TS="children" OR TS=adolescen* OR TS=infant* OR TS="WORKER" OR TS="WORKERS" OR TS="HUMAN" OR TS=patient* OR TS="mother" OR TS="fetal" OR TS="fetus" OR TS="citizens" OR TS="milk" OR TS="formula")) AND PY=(2019-2021)</p>                                                                                                                                                                                                                                                                                                                                                                                                                                                                     |
| 2/8/2019                | <p>(TS="naphthalene" OR TS="albicarbon" OR TS="naphthalin" OR TS="naphthaline" OR TS="naphthene" OR TS="naphtalene" OR TS="camphor tar" OR TS="tar camphor" OR TS="white tar" OR TS="moth balls" OR TS="moth flakes" OR TS="mothballs" OR TS="Naphtalinum" OR TS="Naphthalinum" OR TS="Dezodorator" OR TS="Mighty 150" OR TS="Mighty RD1") AND ((WC="Toxicology" OR WC="Endocrinology &amp; Metabolism" OR WC="Gastroenterology &amp; Hepatology" OR WC="Gastroenterology &amp; Hepatology" OR WC="Hematology" OR WC="Neurosciences" OR WC="Obstetrics &amp; Gynecology" OR WC="Pharmacology &amp; Pharmacy" OR WC="Physiology" OR WC="Respiratory System" OR WC="Urology &amp; Nephrology" OR WC="Anatomy &amp; Morphology" OR WC="Andrology" OR WC="Pathology" OR WC="Otorhinolaryngology" OR WC="Ophthalmology" OR WC="Pediatrics" OR WC="Oncology" OR WC="Reproductive Biology" OR WC="Developmental Biology" OR WC="Biology" OR WC="Dermatology" OR WC="Allergy" OR WC="Public, Environmental &amp; Occupational Health" OR SU="Anatomy &amp; Morphology" OR SU="Cardiovascular System &amp; Cardiology" OR SU="Developmental Biology" OR SU="Endocrinology &amp; Metabolism" OR SU="Gastroenterology &amp; Hepatology" OR SU="Hematology" OR SU="Immunology" OR SU="Neurosciences &amp; Neurology" OR SU="Obstetrics &amp; Gynecology" OR SU="Oncology" OR SU="Ophthalmology" OR SU="Pathology" OR SU="Pediatrics" OR SU="Pharmacology &amp; Pharmacy" OR SU="Physiology" OR SU="Public, Environmental &amp; Occupational Health" OR SU="Respiratory System" OR SU="Toxicology" OR SU="Urology &amp; Nephrology" OR SU="Reproductive Biology" OR SU="Dermatology" OR SU="Allergy") OR (WC="veterinary sciences" AND (TS="rat" OR TS="rats" OR TS="mouse" OR TS="murine" OR TS="mice" OR TS="guinea" OR TS="muridae" OR TS=rabbit* OR TS=lagomorph* OR TS=hamster* OR TS=ferret* OR TS=gerbil* OR TS=rodent* OR TS="dog" OR TS="dogs" OR TS=beagle* OR TS="canine" OR TS="cats" OR TS="feline" OR TS="pig" OR TS="pigs" OR TS="swine" OR TS="porcine" OR TS=monkey* OR TS=macaque* OR TS=baboon* OR TS=marmoset*)) OR (TS=toxic* AND (TS="rat" OR TS="rats" OR TS="mouse" OR TS="murine" OR TS="mice" OR</p> |

| Database<br>Search Date | Query String                                                                                                                                                                                                                                                                                                                                                                                                                                                                                                                                                                                                                                                                                                                                                                                                                                                                                                                                                                                                                                                                                                                                                                                                                                                                                                                                                                                                                                                                                                                                                                                                                                                                                                                                                                                                                                                                                                                                                                                                                                                                                                                                                                                                                                                                                                                                                                                                                                                                                                                                                                |
|-------------------------|-----------------------------------------------------------------------------------------------------------------------------------------------------------------------------------------------------------------------------------------------------------------------------------------------------------------------------------------------------------------------------------------------------------------------------------------------------------------------------------------------------------------------------------------------------------------------------------------------------------------------------------------------------------------------------------------------------------------------------------------------------------------------------------------------------------------------------------------------------------------------------------------------------------------------------------------------------------------------------------------------------------------------------------------------------------------------------------------------------------------------------------------------------------------------------------------------------------------------------------------------------------------------------------------------------------------------------------------------------------------------------------------------------------------------------------------------------------------------------------------------------------------------------------------------------------------------------------------------------------------------------------------------------------------------------------------------------------------------------------------------------------------------------------------------------------------------------------------------------------------------------------------------------------------------------------------------------------------------------------------------------------------------------------------------------------------------------------------------------------------------------------------------------------------------------------------------------------------------------------------------------------------------------------------------------------------------------------------------------------------------------------------------------------------------------------------------------------------------------------------------------------------------------------------------------------------------------|
|                         | TS="guinea" OR TS="muridae" OR TS=rabbit* OR TS=lagomorph* OR TS=hamster* OR TS=ferret* OR TS=gerbil* OR TS=rodent* OR TS="dog" OR TS="dogs" OR TS=beagle* OR TS="canine" OR TS="cats" OR TS="feline" OR TS="pig" OR TS="pigs" OR TS="swine" OR TS="porcine" OR TS=monkey* OR TS=macaque* OR TS=baboon* OR TS=marmoset*) OR (TS="child" OR TS="children" OR TS=adolescen* OR TS=infant* OR TS="WORKER" OR TS="WORKERS" OR TS="HUMAN" OR TS=patient* OR TS=mother OR TS=fetal OR TS=fetus OR TS=citizens OR TS=milk OR TS=formula)) OR TI=toxic*) AND PY=(2017-2019)                                                                                                                                                                                                                                                                                                                                                                                                                                                                                                                                                                                                                                                                                                                                                                                                                                                                                                                                                                                                                                                                                                                                                                                                                                                                                                                                                                                                                                                                                                                                                                                                                                                                                                                                                                                                                                                                                                                                                                                                         |
| 9/29/2017               | (TS="naphthalene" OR TS="albo carbon" OR TS="naphthalin" OR TS="naphthaline" OR TS="naphthene" OR TS="naphtalene" OR TS="camphor tar" OR TS="tar camphor" OR TS="white tar" OR TS="moth balls" OR TS="moth flakes" OR TS="mothballs" OR TS="Naphtalinum" OR TS="Naphthalinum" OR TS="Dezodorator" OR TS="Mighty 150" OR TS="Mighty RD1") AND ((WC=("Toxicology" OR "Endocrinology & Metabolism" OR "Gastroenterology & Hepatology" OR "Gastroenterology & Hepatology" OR "Hematology" OR "Neurosciences" OR "Obstetrics & Gynecology" OR "Pharmacology & Pharmacy" OR "Physiology" OR "Respiratory System" OR "Urology & Nephrology" OR "Anatomy & Morphology" OR "Andrology" OR "Pathology" OR "Otorhinolaryngology" OR "Ophthalmology" OR "Pediatrics" OR "Oncology" OR "Reproductive Biology" OR "Developmental Biology" OR "Biology" OR "Dermatology" OR "Allergy" OR "Public, Environmental & Occupational Health") OR SU=("Anatomy & Morphology" OR "Cardiovascular System & Cardiology" OR "Developmental Biology" OR "Endocrinology & Metabolism" OR "Gastroenterology & Hepatology" OR "Hematology" OR "Immunology" OR "Neurosciences & Neurology" OR "Obstetrics & Gynecology" OR "Oncology" OR "Ophthalmology" OR "Pathology" OR "Pediatrics" OR "Pharmacology & Pharmacy" OR "Physiology" OR "Public, Environmental & Occupational Health" OR "Respiratory System" OR "Toxicology" OR "Urology & Nephrology" OR "Reproductive Biology" OR "Dermatology" OR "Allergy")) OR (WC="veterinary sciences" AND (TS="rat" OR TS="rats" OR TS="mouse" OR TS="murine" OR TS="mice" OR TS="guinea" OR TS="muridae" OR TS=rabbit* OR TS=lagomorph* OR TS=hamster* OR TS=ferret* OR TS=gerbil* OR TS=rodent* OR TS="dog" OR TS="dogs" OR TS=beagle* OR TS="canine" OR TS="cats" OR TS="feline" OR TS="pig" OR TS="pigs" OR TS="swine" OR TS="porcine" OR TS=monkey* OR TS=macaque* OR TS=baboon* OR TS=marmoset*)) OR (TS=toxic* AND (TS="rat" OR TS="rats" OR TS="mouse" OR TS="murine" OR TS="mice" OR TS="guinea" OR TS="muridae" OR TS=rabbit* OR TS=lagomorph* OR TS=hamster* OR TS=ferret* OR TS=gerbil* OR TS=rodent* OR TS="dog" OR TS="dogs" OR TS=beagle* OR TS="canine" OR TS="cats" OR TS="feline" OR TS="pig" OR TS="pigs" OR TS="swine" OR TS="porcine" OR TS=monkey* OR TS=macaque* OR TS=baboon* OR TS=marmoset*) OR (TS="child" OR TS="children" OR TS=adolescen* OR TS=infant* OR TS="WORKER" OR TS="WORKERS" OR TS="HUMAN" OR TS=patient* OR TS=mother OR TS=fetal OR TS=fetus OR TS=citizens OR TS=milk OR TS=formula)) OR TI=toxic*) AND PY=(2017-2017) |
| 01/04/2017              | (TS="naphthalene" OR TS="albo carbon" OR TS="naphthalin" OR TS="naphthaline" OR TS="naphthene" OR TS="naphtalene" OR TS="camphor tar" OR TS="tar camphor" OR TS="white tar" OR TS="moth balls" OR TS="moth flakes" OR TS="mothballs" OR TS="Naphtalinum" OR TS="Naphthalinum" OR TS="Dezodorator" OR TS="Mighty 150" OR TS="Mighty RD1") AND ((WC=("Toxicology" OR "Endocrinology & Metabolism" OR "Gastroenterology & Hepatology" OR "Gastroenterology & Hepatology" OR "Hematology" OR "Neurosciences" OR "Obstetrics & Gynecology" OR "Pharmacology & Pharmacy" OR "Physiology" OR "Respiratory System" OR                                                                                                                                                                                                                                                                                                                                                                                                                                                                                                                                                                                                                                                                                                                                                                                                                                                                                                                                                                                                                                                                                                                                                                                                                                                                                                                                                                                                                                                                                                                                                                                                                                                                                                                                                                                                                                                                                                                                                               |

| Database<br>Search Date | Query String                                                                                                                                                                                                                                                                                                                                                                                                                                                                                                                                                                                                                                                                                                                                                                                                                                                                                                                                                                                                                                                                                                                                                                                                                                                                                                                                                                                                                                                                                                                                                                                                                                                                                                                                                                                                                                                                                                                                                                                                                            |
|-------------------------|-----------------------------------------------------------------------------------------------------------------------------------------------------------------------------------------------------------------------------------------------------------------------------------------------------------------------------------------------------------------------------------------------------------------------------------------------------------------------------------------------------------------------------------------------------------------------------------------------------------------------------------------------------------------------------------------------------------------------------------------------------------------------------------------------------------------------------------------------------------------------------------------------------------------------------------------------------------------------------------------------------------------------------------------------------------------------------------------------------------------------------------------------------------------------------------------------------------------------------------------------------------------------------------------------------------------------------------------------------------------------------------------------------------------------------------------------------------------------------------------------------------------------------------------------------------------------------------------------------------------------------------------------------------------------------------------------------------------------------------------------------------------------------------------------------------------------------------------------------------------------------------------------------------------------------------------------------------------------------------------------------------------------------------------|
|                         | <p>"Urology &amp; Nephrology" OR "Anatomy &amp; Morphology" OR "Andrology" OR "Pathology" OR "Otorhinolaryngology" OR "Ophthalmology" OR "Pediatrics" OR "Oncology" OR "Reproductive Biology" OR "Developmental Biology" OR "Biology" OR "Dermatology" OR "Allergy" OR "Public, Environmental &amp; Occupational Health") OR SU=("Anatomy &amp; Morphology" OR "Cardiovascular System &amp; Cardiology" OR "Developmental Biology" OR "Endocrinology &amp; Metabolism" OR "Gastroenterology &amp; Hepatology" OR "Hematology" OR "Immunology" OR "Neurosciences &amp; Neurology" OR "Obstetrics &amp; Gynecology" OR "Oncology" OR "Ophthalmology" OR "Pathology" OR "Pediatrics" OR "Pharmacology &amp; Pharmacy" OR "Physiology" OR "Public, Environmental &amp; Occupational Health" OR "Respiratory System" OR "Toxicology" OR "Urology &amp; Nephrology" OR "Reproductive Biology" OR "Dermatology" OR "Allergy")) OR (WC="veterinary sciences" AND (TS="rat" OR TS="rats" OR TS="mouse" OR TS="murine" OR TS="mice" OR TS="guinea" OR TS="muridae" OR TS=rabbit* OR TS=lagomorph* OR TS=hamster* OR TS=ferret* OR TS=gerbil* OR TS=rodent* OR TS="dog" OR TS="dogs" OR TS=beagle* OR TS="canine" OR TS="cats" OR TS="feline" OR TS="pig" OR TS="pigs" OR TS="swine" OR TS="porcine" OR TS=monkey* OR TS=macaque* OR TS=baboon* OR TS=marmoset*)) OR (TS=toxic* AND (TS="rat" OR TS="rats" OR TS="mouse" OR TS="murine" OR TS="mice" OR TS="guinea" OR TS="muridae" OR TS=rabbit* OR TS=lagomorph* OR TS=hamster* OR TS=ferret* OR TS=gerbil* OR TS=rodent* OR TS="dog" OR TS="dogs" OR TS=beagle* OR TS="canine" OR TS="cats" OR TS="feline" OR TS="pig" OR TS="pigs" OR TS="swine" OR TS="porcine" OR TS=monkey* OR TS=macaque* OR TS=baboon* OR TS=marmoset*)) OR (TS="child" OR TS="children" OR TS=adolescen* OR TS=infant* OR TS="WORKER" OR TS="WORKERS" OR TS="HUMAN" OR TS=patient* OR TS=mother OR TS=fetal OR TS=fetus OR TS=citizens OR TS=milk OR TS=formula)) OR TI=toxic*) AND PY=(2015-2017)</p>                   |
| 11/04/2015              | <p>(TS="naphthalene" OR TS="albicarbon" OR TS="naphthalin" OR TS="naphthaline" OR TS="naphthene" OR TS="naphtalene" OR TS="camphor tar" OR TS="tar camphor" OR TS="white tar" OR TS="moth balls" OR TS="moth flakes" OR TS="mothballs" OR TS="Naphtalinum" OR TS="Naphthalinum" OR TS="Dezodorator" OR TS="Mighty 150" OR TS="Mighty RD1") AND ((WC=("Toxicology" OR "Endocrinology &amp; Metabolism" OR "Gastroenterology &amp; Hepatology" OR "Gastroenterology &amp; Hepatology" OR "Hematology" OR "Neurosciences" OR "Obstetrics &amp; Gynecology" OR "Pharmacology &amp; Pharmacy" OR "Physiology" OR "Respiratory System" OR "Urology &amp; Nephrology" OR "Anatomy &amp; Morphology" OR "Andrology" OR "Pathology" OR "Otorhinolaryngology" OR "Ophthalmology" OR "Pediatrics" OR "Oncology" OR "Reproductive Biology" OR "Developmental Biology" OR "Biology" OR "Dermatology" OR "Allergy" OR "Public, Environmental &amp; Occupational Health") OR SU=("Anatomy &amp; Morphology" OR "Cardiovascular System &amp; Cardiology" OR "Developmental Biology" OR "Endocrinology &amp; Metabolism" OR "Gastroenterology &amp; Hepatology" OR "Hematology" OR "Immunology" OR "Neurosciences &amp; Neurology" OR "Obstetrics &amp; Gynecology" OR "Oncology" OR "Ophthalmology" OR "Pathology" OR "Pediatrics" OR "Pharmacology &amp; Pharmacy" OR "Physiology" OR "Public, Environmental &amp; Occupational Health" OR "Respiratory System" OR "Toxicology" OR "Urology &amp; Nephrology" OR "Reproductive Biology" OR "Dermatology" OR "Allergy")) OR (WC="veterinary sciences" AND (TS="rat" OR TS="rats" OR TS="mouse" OR TS="murine" OR TS="mice" OR TS="guinea" OR TS="muridae" OR TS=rabbit* OR TS=lagomorph* OR TS=hamster* OR TS=ferret* OR TS=gerbil* OR TS=rodent* OR TS="dog" OR TS="dogs" OR TS=beagle* OR TS="canine" OR TS="cats" OR TS="feline" OR TS="pig" OR TS="pigs" OR TS="swine" OR TS="porcine" OR TS=monkey* OR TS=macaque* OR TS=baboon* OR TS=marmoset*)) OR (TS=toxic* AND (TS="rat" OR TS="rats" OR</p> |

| Database<br>Search Date | Query String                                                                                                                                                                                                                                                                                                                                                                                                                                                                                                                                                                                                                                                                                                                                                                                                                                                                                                                                                                                                                                                                                                                                                                                                                                                                                                                                                                                                                                                                                                                                                                                                                                                                                                                                                                                                                                                                                                                                                                                                                                                                                                                                                                                                                                                                                                                                                                                                                                                                                                                                                                                                                                                   |
|-------------------------|----------------------------------------------------------------------------------------------------------------------------------------------------------------------------------------------------------------------------------------------------------------------------------------------------------------------------------------------------------------------------------------------------------------------------------------------------------------------------------------------------------------------------------------------------------------------------------------------------------------------------------------------------------------------------------------------------------------------------------------------------------------------------------------------------------------------------------------------------------------------------------------------------------------------------------------------------------------------------------------------------------------------------------------------------------------------------------------------------------------------------------------------------------------------------------------------------------------------------------------------------------------------------------------------------------------------------------------------------------------------------------------------------------------------------------------------------------------------------------------------------------------------------------------------------------------------------------------------------------------------------------------------------------------------------------------------------------------------------------------------------------------------------------------------------------------------------------------------------------------------------------------------------------------------------------------------------------------------------------------------------------------------------------------------------------------------------------------------------------------------------------------------------------------------------------------------------------------------------------------------------------------------------------------------------------------------------------------------------------------------------------------------------------------------------------------------------------------------------------------------------------------------------------------------------------------------------------------------------------------------------------------------------------------|
|                         | TS="mouse" OR TS="murine" OR TS="mice" OR TS="guinea" OR TS="muridae" OR TS=rabbit* OR<br>TS=lagomorph* OR TS=hamster* OR TS=ferret* OR TS=gerbil* OR TS=rodent* OR TS="dog" OR<br>TS="dogs" OR TS=beagle* OR TS="canine" OR TS="cats" OR TS="feline" OR TS="pig" OR TS="pigs"<br>OR TS="swine" OR TS="porcine" OR TS=monkey* OR TS=macaque* OR TS=baboon* OR<br>TS=marmoset*) OR (TS="child" OR TS="children" OR TS=adolescen* OR TS=infant* OR<br>TS="WORKER" OR TS="WORKERS" OR TS="HUMAN" OR TS=patient* OR TS=mother OR TS=fetal OR<br>TS=fetus OR TS=citizens OR TS=milk OR TS=formula)) OR TI=toxic*) AND PY=(2014-2016)                                                                                                                                                                                                                                                                                                                                                                                                                                                                                                                                                                                                                                                                                                                                                                                                                                                                                                                                                                                                                                                                                                                                                                                                                                                                                                                                                                                                                                                                                                                                                                                                                                                                                                                                                                                                                                                                                                                                                                                                                                |
| 12/16/2014              | ((TS="naphthalene" OR TS="albobarbon" OR TS="naphthalin" OR TS="naphthaline" OR<br>TS="naphthene" OR TS="naphtalene" OR TS="camphor tar" OR TS="tar camphor" OR TS="white<br>tar" OR TS="moth balls" OR TS="moth flakes" OR TS="mothballs" OR TS="Naphtalinum" OR<br>TS="Naphthalinum" OR TS="Dezodorator" OR TS="Mighty 150" OR TS="Mighty RD1") AND<br>((WC=("Toxicology" OR "Endocrinology & Metabolism" OR "Gastroenterology & Hepatology" OR<br>"Gastroenterology & Hepatology" OR "Hematology" OR "Neurosciences" OR "Obstetrics &<br>Gynecology" OR "Pharmacology & Pharmacy" OR "Physiology" OR "Respiratory System" OR<br>"Urology & Nephrology" OR "Anatomy & Morphology" OR "Andrology" OR "Pathology" OR<br>"Otorhinolaryngology" OR "Ophthalmology" OR "Pediatrics" OR "Oncology" OR "Reproductive<br>Biology" OR "Developmental Biology" OR "Biology" OR "Dermatology" OR "Allergy" OR "Public,<br>Environmental & Occupational Health") OR SU=("Anatomy & Morphology" OR "Cardiovascular<br>System & Cardiology" OR "Developmental Biology" OR "Endocrinology & Metabolism" OR<br>"Gastroenterology & Hepatology" OR "Hematology" OR "Immunology" OR "Neurosciences &<br>Neurology" OR "Obstetrics & Gynecology" OR "Oncology" OR "Ophthalmology" OR "Pathology" OR<br>"Pediatrics" OR "Pharmacology & Pharmacy" OR "Physiology" OR "Public, Environmental &<br>Occupational Health" OR "Respiratory System" OR "Toxicology" OR "Urology & Nephrology" OR<br>"Reproductive Biology" OR "Dermatology" OR "Allergy")) OR (WC="veterinary sciences" AND<br>(TS="rat" OR TS="rats" OR TS="mouse" OR TS="murine" OR TS="mice" OR TS="guinea" OR<br>TS="muridae" OR TS=rabbit* OR TS=lagomorph* OR TS=hamster* OR TS=ferret* OR TS=gerbil* OR<br>TS=rodent* OR TS="dog" OR TS="dogs" OR TS=beagle* OR TS="canine" OR TS="cats" OR<br>TS="feline" OR TS="pig" OR TS="pigs" OR TS="swine" OR TS="porcine" OR TS=monkey* OR<br>TS=macaque* OR TS=baboon* OR TS=marmoset*)) OR (TS=toxic* AND (TS="rat" OR TS="rats" OR<br>TS="mouse" OR TS="murine" OR TS="mice" OR TS="guinea" OR TS="muridae" OR TS=rabbit* OR<br>TS=lagomorph* OR TS=hamster* OR TS=ferret* OR TS=gerbil* OR TS=rodent* OR TS="dog" OR<br>TS="dogs" OR TS=beagle* OR TS="canine" OR TS="cats" OR TS="feline" OR TS="pig" OR TS="pigs"<br>OR TS="swine" OR TS="porcine" OR TS=monkey* OR TS=macaque* OR TS=baboon* OR<br>TS=marmoset*) OR (TS="child" OR TS="children" OR TS=adolescen* OR TS=infant* OR<br>TS="WORKER" OR TS="WORKERS" OR TS="HUMAN" OR TS=patient* OR TS=mother OR TS=fetal OR<br>TS=fetus OR TS=citizens OR TS=milk OR TS=formula)) OR TI=toxic*)) AND PY=2012-2015 |
| 02/21/2013              | ((TS="naphthalene" OR TS="albobarbon" OR TS="naphthalin" OR TS="naphthaline" OR<br>TS="naphthene" OR TS="naphtalene" OR TS="camphor tar" OR TS="tar camphor" OR TS="white<br>tar" OR TS="moth balls" OR TS="moth flakes" OR TS=mothballs) NOT TS="naphthalene acetic<br>acid") AND (TS="chronic" OR TS=immun* OR TS=lymph* OR TS=neurotox* OR TS=toxicokin* OR<br>TS=pharmacokin* OR TS=biomarker* OR TS=neurolog* OR TS="subchronic" OR TS="pbpk" OR<br>TS=epidemiolog* OR TS="acute" OR TS="subacute" OR TS="ld50")                                                                                                                                                                                                                                                                                                                                                                                                                                                                                                                                                                                                                                                                                                                                                                                                                                                                                                                                                                                                                                                                                                                                                                                                                                                                                                                                                                                                                                                                                                                                                                                                                                                                                                                                                                                                                                                                                                                                                                                                                                                                                                                                          |

| Database    |                                                                                                                                                                                                                                                                                                                                                                                                                                                                                                                                                                                                                                                                         |
|-------------|-------------------------------------------------------------------------------------------------------------------------------------------------------------------------------------------------------------------------------------------------------------------------------------------------------------------------------------------------------------------------------------------------------------------------------------------------------------------------------------------------------------------------------------------------------------------------------------------------------------------------------------------------------------------------|
| Search Date | Query String                                                                                                                                                                                                                                                                                                                                                                                                                                                                                                                                                                                                                                                            |
|             | <p>((TS="naphthalene" OR TS="albo carbon" OR TS="naphthalin" OR TS="naphthaline" OR TS="naphthene" OR TS="naphtalene" OR TS="camphor tar" OR TS="tar camphor" OR TS="white tar" OR TS="moth balls" OR TS="moth flakes" OR TS=mothballs) NOT TS="naphthalene acetic acid") AND (TS="lc50" OR TS=inhal* OR TS=pulmon* OR TS="nasal" OR TS=lung* OR TS=respir* OR TS=occupation* OR TS="workplace" OR TS=worker* OR TS="oral" OR TS="orally" OR TS=ingest* OR TS="gavage" OR TS="diet" OR TS="diets" OR TS="dietary" OR TS="drinking" OR TS=gastr* OR TS=intestin* OR TS=liver* OR TS=hepat* OR TS=kidney* OR TS=neph*)</p>                                                |
|             | <p>((TS="naphthalene" OR TS="albo carbon" OR TS="naphthalin" OR TS="naphthaline" OR TS="naphthene" OR TS="naphtalene" OR TS="camphor tar" OR TS="tar camphor" OR TS="white tar" OR TS="moth balls" OR TS="moth flakes" OR TS=mothballs) NOT TS="naphthalene acetic acid") AND (TS="gut" OR TS=sensitiz* OR TS=abort* OR TS=abnormalit* OR TS=embryo* OR TS=cleft* OR TS=fetus* OR TS=foetus* OR TS=fetal* OR TS=foetal* OR TS=fertil* OR TS=infertil* OR TS="fertilization" OR TS="fertilisation" OR TS=malform* OR TS="ovum" OR TS="ova" OR TS="ovary" OR TS="ovaries" OR TS="ovarian" OR TS=placenta* OR TS=pregnan*)</p>                                             |
|             | <p>((TS="naphthalene" OR TS="albo carbon" OR TS="naphthalin" OR TS="naphthaline" OR TS="naphthene" OR TS="naphtalene" OR TS="camphor tar" OR TS="tar camphor" OR TS="white tar" OR TS="moth balls" OR TS="moth flakes" OR TS=mothballs) NOT TS="naphthalene acetic acid") AND (TS=dermal* OR TS="dermis" OR TS="skin" OR TS=epiderm* OR TS="cutaneous" OR TS=carcinog* OR TS=cocarcinog* OR TS="cancer" OR TS="precancer" OR TS=neoplas* OR TS=tumor* OR TS=tumour* OR TS=oncogen* OR TS=lymphoma* OR TS=carcinom* OR TS=genetox* OR TS=genotox* OR TS=mutagen* OR TS=nephrotox* OR TS=hepatotox* OR TS=endocrin* OR TS=estrogen* OR TS=androgen*)</p>                  |
|             | <p>((TS="naphthalene" OR TS="albo carbon" OR TS="naphthalin" OR TS="naphthaline" OR TS="naphthene" OR TS="naphtalene" OR TS="camphor tar" OR TS="tar camphor" OR TS="white tar" OR TS="moth balls" OR TS="moth flakes" OR TS=mothballs) NOT TS="naphthalene acetic acid") AND (TS=hormon* OR TS="blood" OR TS="serum" OR TS="urine" OR TS="bone" OR TS="bones" OR TS=skelet* OR TS="rat" OR TS="rats" OR TS="mouse")</p>                                                                                                                                                                                                                                                |
|             | <p>((TS="naphthalene" OR TS="albo carbon" OR TS="naphthalin" OR TS="naphthaline" OR TS="naphthene" OR TS="naphtalene" OR TS="camphor tar" OR TS="tar camphor" OR TS="white tar" OR TS="moth balls" OR TS="moth flakes" OR TS=mothballs) NOT TS="naphthalene acetic acid") AND (TS="mice" OR TS="guinea" OR TS="muridae" OR TS=rabbit* OR TS=lagomorph* OR TS=hamster* OR TS=ferret* OR TS=gerbil* OR TS=rodent* OR TS="dog" OR TS="dogs" OR TS=beagle* OR TS="canine" OR TS="cats" OR TS="feline" OR TS="pig" OR TS="pigs" OR TS="swine" OR TS="porcine" OR TS=monkey* OR TS=macaque* OR TS=baboon* OR TS=marmoset* OR TS=toxic* OR TS="adverse" OR TS="poisoning")</p> |
|             | <p>((TS="naphthalene" OR TS="albo carbon" OR TS="naphthalin" OR TS="naphthaline" OR TS="naphthene" OR TS="naphtalene" OR TS="camphor tar" OR TS="tar camphor" OR TS="white tar" OR TS="moth balls" OR TS="moth flakes" OR TS=mothballs) NOT TS="naphthalene acetic acid") AND (TS="prenatal" OR TS="perinatal" OR TS="postnatal" OR TS="reproduce" OR TS=reproduct* OR TS=steril* OR TS=teratogen* OR TS=sperm* OR TS=neonat* OR TS=newborn*)</p>                                                                                                                                                                                                                       |

| Database    |                                                                                                                                                                                                                                                                                                                                                                                                                                                                                                                                               |
|-------------|-----------------------------------------------------------------------------------------------------------------------------------------------------------------------------------------------------------------------------------------------------------------------------------------------------------------------------------------------------------------------------------------------------------------------------------------------------------------------------------------------------------------------------------------------|
| Search Date | Query String                                                                                                                                                                                                                                                                                                                                                                                                                                                                                                                                  |
|             | OR TS=development* OR TS=zygote* OR TS="child" OR TS="children" OR TS=adolescen* OR TS=infant* OR TS=wean* OR TS="offspring" OR TS="age factor" OR TS="age factors")                                                                                                                                                                                                                                                                                                                                                                          |
|             | ((TS="naphthalene" OR TS="albicarbon" OR TS="naphthalin" OR TS="naphthaline" OR TS="naphthene" OR TS="naphtalene" OR TS="camphor tar" OR TS="tar camphor" OR TS="white tar" OR TS="moth balls" OR TS="moth flakes" OR TS=mothballs) NOT TS="naphthalene acetic acid") AND (TS="Genomics" OR TS="Proteomics" OR TS="Metabolic Profile" OR TS="Metabolome" OR TS="Metabolomics" OR TS="Microarray" OR TS="Nanoarray")                                                                                                                           |
|             | ((TS="naphthalene" OR TS="albicarbon" OR TS="naphthalin" OR TS="naphthaline" OR TS="naphthene" OR TS="naphtalene" OR TS="camphor tar" OR TS="tar camphor" OR TS="white tar" OR TS="moth balls" OR TS="moth flakes" OR TS=mothballs) NOT TS="naphthalene acetic acid") AND (TS="Gene expression" OR TS="Transcript expression" OR TS="transcriptomes" OR TS="transcriptome" OR TS="Phenotype" OR TS="Transcription" OR TS="Trans-act*" OR TS="transact*" OR TS="trans act*" OR TS=genetic OR TS="genetics" OR TS="genotype")                   |
|             | ((TS="naphthalene" OR TS="albicarbon" OR TS="naphthalin" OR TS="naphthaline" OR TS="naphthene" OR TS="naphtalene" OR TS="camphor tar" OR TS="tar camphor" OR TS="white tar" OR TS="moth balls" OR TS="moth flakes" OR TS=mothballs) NOT TS="naphthalene acetic acid") AND (TS="Informatics" OR (TS="Information Science" AND TS=Medical OR TS="Systems biology" OR (TS="Biological systems" AND (TS=monit* OR TS=data OR TS=analysis))))                                                                                                      |
|             | ((TS="naphthalene" OR TS="albicarbon" OR TS="naphthalin" OR TS="naphthaline" OR TS="naphthene" OR TS="naphtalene" OR TS="camphor tar" OR TS="tar camphor" OR TS="white tar" OR TS="moth balls" OR TS="moth flakes" OR TS=mothballs) NOT TS="naphthalene acetic acid") AND (TS="Genetic transcription" OR TS="Gene transcription" OR TS="Gene Activation" OR TS="Genetic induction" OR TS="Reverse transcription" OR TS="Transcriptional activation" OR TS="Transcription factors" OR (TS="Biosynthesis" AND (TS=RNA OR TS=DNA)) OR TS="mRNA") |
|             | ((TS="naphthalene" OR TS="albicarbon" OR TS="naphthalin" OR TS="naphthaline" OR TS="naphthene" OR TS="naphtalene" OR TS="camphor tar" OR TS="tar camphor" OR TS="white tar" OR TS="moth balls" OR TS="moth flakes" OR TS=mothballs) NOT TS="naphthalene acetic acid") AND (TS="messenger RNA" OR TS="transfer RNA" OR TS="peptide biosynthesis" OR TS="protein biosynthesis" OR TS="protein synthesis" OR TS="RT-PCR" OR TS="RTPCR" OR TS="Reverse Transcriptase Polymerase Chain Reaction" OR TS="DNA sequence")                             |
| ToxLine     |                                                                                                                                                                                                                                                                                                                                                                                                                                                                                                                                               |
| 2/8/2019    | @syn0+@AND+@OR+(naphthalene+albicarbon+naphthalin+naphthaline+naphthene+naphtalene+"camphor+tar"+"tar+camphor"+"white+tar"+"moth+balls"+"moth+flakes"+mothballs+Naphtalinum+Naphthalinum+Dezodorator+"Mighty+150"+"Mighty+RD1"+@term+@rn+91+20+3)+@and+@range+yr+2017+2019+@not+@org+pubmed                                                                                                                                                                                                                                                   |
| 9/29/2017   | @syn0+@AND+@OR+(naphthalene+albicarbon+naphthalin+naphthaline+naphthene+naphtalene+"camphor+tar"+"tar+camphor"+"white+tar"+"moth+balls"+"moth+flakes"+mothballs+Naphtalinum                                                                                                                                                                                                                                                                                                                                                                   |

| Database                                                                           | Query String                                                                                                                                                                                                                                                                                                                            |
|------------------------------------------------------------------------------------|-----------------------------------------------------------------------------------------------------------------------------------------------------------------------------------------------------------------------------------------------------------------------------------------------------------------------------------------|
| Search Date                                                                        |                                                                                                                                                                                                                                                                                                                                         |
|                                                                                    | m+Naphthalinum+Dezodorator+"Mighty+150"+"Mighty+RD1"+@term+@rn+91+20+3)+@and+@range+yr+2017+@not+@org+pubmed                                                                                                                                                                                                                            |
| 01/04/2017                                                                         | @syn0+@OR+(piscsqcorrection+naphthalene+albobcarbon+naphthalin+naphthaline+naphthene+naphthalene+"camphor tar"+"tar camphor"+"white tar"+"moth balls"+"moth flakes"+mothballs+Naphtalinum+Naphthalinum+Dezodorator+"Mighty 150"+"Mighty RD1"+@term+@rn+91-20-3)+@and+@range+yr+2015+2017+@not+@org+pubmed+pubdart+"nih+reporter"+tscats |
| 11/09/2015                                                                         | @syn0+@OR+(piscsqcorrection+naphthalene+albobcarbon+naphthalin+naphthaline+naphthene+naphthalene+"camphor tar"+"tar camphor"+"white tar"+"moth balls"+"moth flakes"+mothballs+Naphtalinum+Naphthalinum+Dezodorator+"Mighty 150"+"Mighty RD1"+@term+@rn+91-20-3)+@and+@range+yr+2014+2016+@not+@org+pubmed+pubdart+"nih+reporter"+tscats |
| 12/16/2014                                                                         | @OR+(naphthalene+albobcarbon+naphthalin+naphthaline+naphthene+naphthalene+mothballs+@term+@rn+91-20-3)+@AND+@range+yr+2012+2015+@NOT+@org+pubmed+pubdart+"nih+reporter"+tscats<br>@OR+("camphor+tar"+"tar+camphor"+"white+tar"+"moth+balls"+"moth+flakes")+@AND+@range+yr+2012+2015+@NOT+@org+pubmed+pubdart+"nih+reporter"+tscats      |
| 02/18/2013                                                                         | @OR+(naphthalene+albobcarbon+naphthalin+naphthaline+naphthene+naphthalene+mothballs+@term+@rn+91-20-3)+@NOT+@org+pubmed+pubdart+crisp+tscats<br>@OR+("camphor+tar"+"tar+camphor"+"white+tar"+"moth+balls"+"moth+flakes")+@NOT+@org+pubmed+pubdart+crisp+tscats                                                                          |
| <b>Toxic Substances Control Act Test Submissions (TSCATS) via CDAT<sup>a</sup></b> |                                                                                                                                                                                                                                                                                                                                         |
|                                                                                    |                                                                                                                                                                                                                                                                                                                                         |
| 01/04/2017                                                                         | 91-20-3<br>Mail Received Date Range 10/01/2015 to 01/04/2017                                                                                                                                                                                                                                                                            |
| 11/04/2015                                                                         | 91-20-3<br>Mail Received Date Range 01/01/2014 to 11/04/2015                                                                                                                                                                                                                                                                            |

| Database                                                  | Query String                                             |
|-----------------------------------------------------------|----------------------------------------------------------|
| Search Date                                               | Query String                                             |
| <b>TSCATS 2<sup>b</sup></b>                               |                                                          |
| 01/04/2017                                                | 91-20-3<br>EPA receipt date 10/01/2015 to date of search |
| 12/16/2014                                                | 91-20-3<br>EPA receipt date 02/01/2013 to date of search |
| 05/01/2013                                                | 91-20-3 date limited, 2000 to date of search             |
| <b>TSCATS 1<sup>c</sup></b>                               |                                                          |
| 02/18/2013                                                | @term+@rn+91-20-3+@AND+@org+tscats                       |
| <b>TSCA section 8e/FYI recent submissions<sup>d</sup></b> |                                                          |
| 01/04/2017                                                | Google: 91-20-3 (8e or fyi) tsca                         |
| 12/16/2014                                                | Google: 91-20-3 (8e or fyi) tsca                         |
| 05/01/2013                                                | Google: 91-20-3 (8e or fyi) tsca                         |

<sup>a</sup> CDAT (Chemical Data Access Tool); formerly available at [http://java.epa.gov/oppt\\_chemical\\_search/](http://java.epa.gov/oppt_chemical_search/). Information from CDAT has since been incorporated into EPA's ChemView database at <https://chemview.epa.gov/chemview>.

<sup>b</sup> TSCATS 2 was searched via the following database URL: <https://catalog.data.gov/dataset/toxic-substances-control-act-test-submissions-2-0-tscats-2-0>

<sup>c</sup> TSCATS 1 was searched via Toxline

<sup>d</sup> TSCA section 8e/FYI recent submissions were searched via Google

**Table S3. Processes used to augment the search of core databases for naphthalene**

| System Used                     | Selected Reference(s) or Sources                                                                                                                                | Date    | Additional References Identified |
|---------------------------------|-----------------------------------------------------------------------------------------------------------------------------------------------------------------|---------|----------------------------------|
| Manual search of citations from | Bailey et al. (2015). "Hypothesis-based weight-of-evidence evaluation and risk assessment for naphthalene carcinogenesis." Critical Reviews in Toxicology: 1-42 | 12/2015 | 12 citations added               |



| System Used                                                                        | Selected Reference(s) or Sources                                                                                                                                                                                                                                                                     | Date    | Additional References Identified |
|------------------------------------------------------------------------------------|------------------------------------------------------------------------------------------------------------------------------------------------------------------------------------------------------------------------------------------------------------------------------------------------------|---------|----------------------------------|
| published reviews                                                                  | Lewis (2012). "Naphthalene animal carcinogenicity and human relevancy: overview of industries with naphthalene-containing streams." <i>Regulatory Toxicology and Pharmacology</i> 62(1): 131-137                                                                                                     | 12/2015 | 1 citations added                |
|                                                                                    | Piccirillo et al. (2012). "Preliminary evaluation of the human relevance of respiratory tumors observed in rodents exposed to naphthalene." <i>Regulatory Toxicology and Pharmacology</i> 62(3): 433-440.                                                                                            | 12/2015 | 0 citations added                |
|                                                                                    | Magee et al. (2010). "Screening-level population risk assessment of nasal tumors in the US due to naphthalene exposure." <i>Regulatory Toxicology and Pharmacology</i> 57(2-3): 168-180.                                                                                                             | 12/2015 | 0 citations added                |
|                                                                                    | Rhomberg et al. (2010). "Hypothesis-based weight of evidence: a tool for evaluating and communicating uncertainties and inconsistencies in the large body of evidence in proposing a carcinogenic mode of action-- naphthalene as an example." <i>Critical Reviews in Toxicology</i> 40(8): 671-696. | 12/2015 | 0 citations added                |
| Manual search of citations from national and international health agency documents | NTP (2016). Naphthalene (14th ed.). Research Triangle Park, NC: National Toxicology Program. <a href="https://ntp.niehs.nih.gov/ntp/roc/content/profiles/naphthalene.pdf">https://ntp.niehs.nih.gov/ntp/roc/content/profiles/naphthalene.pdf</a>                                                     | 1/2017  | 0 citations added                |
|                                                                                    | ACGIH (2001). Naphthalene. Documentation of the threshold limit values and biological exposure indices. Cincinnati, OH: American Conference of Industrial Hygienists.                                                                                                                                | 5/2013  | 4 citations added                |
|                                                                                    | ATSDR (2005). Toxicological Profile for Naphthalene, 1-Methylnaphthalene, and 2-Methylnaphthalene. Atlanta, GA: Agency for Toxic Substances and Disease Registry.                                                                                                                                    | 5/2013  | 7 citations added                |
|                                                                                    | IARC (2002). IARC Monographs on the evaluation of the carcinogenic risk of chemicals to humans: Some traditional herbal medicines, some mycotoxins, naphthalene, and styrene [IARC Monograph]. Lyon, France.                                                                                         | 5/2013  | 3 citations added                |

| System Used                                       | Selected Reference(s) or Sources                                                                                                                                      | Date    | Additional References Identified |
|---------------------------------------------------|-----------------------------------------------------------------------------------------------------------------------------------------------------------------------|---------|----------------------------------|
|                                                   | <a href="http://monographs.iarc.fr/ENG/Monographs/vol82/mono82.pdf">http://monographs.iarc.fr/ENG/Monographs/vol82/mono82.pdf</a>                                     |         |                                  |
|                                                   | NTP (2011). Naphthalene. In Report on Carcinogens, 12 <sup>th</sup> Edition. National Toxicology Program.                                                             | 5/2013  | 0 citations added                |
|                                                   | WHO (1998). Selected non-heterocyclic polycyclic aromatic hydrocarbons. Environmental Health Criteria, 202. Geneva, Switzerland, World Health Organization.           | 5/2013  | 2 citations added                |
| Web of Science, "forward" search <sup>a</sup>     | Abdo et al. (2001). Toxicity and carcinogenicity study in F344 rats following 2 years of whole-body exposure to naphthalene vapors. Inhalation Toxicology 13:931-950. | 1/2017  | 0 citations added                |
|                                                   |                                                                                                                                                                       | 5/2013  | 0 citations added                |
|                                                   | Dodd et al. (2012). Nasal epithelial lesions in F344 rats following a 90-day inhalation exposure to naphthalene. Inhalation Toxicology 24:70-79.                      | 1/2017  | 0 citations added                |
|                                                   |                                                                                                                                                                       | 5/2013  | 0 citations added                |
|                                                   | Shopp et al. (1984). Naphthalene toxicity in CD-1 mice: general toxicology and immunotoxicology. Toxicological Sciences 4:406-419.                                    | 1/2017  | 0 citations added                |
|                                                   |                                                                                                                                                                       | 5/2013  | 0 citations added                |
| Web of Science, "backward" search <sup>b</sup>    | Abdo et al. (2001). Toxicity and carcinogenicity study in F344 rats following 2 years of whole-body exposure to naphthalene vapors. Inhalation Toxicology 13:931-950. | 5/2013  | 2 citations added                |
|                                                   | Dodd et al. (2012). Nasal epithelial lesions in F344 rats following a 90-day inhalation exposure to naphthalene. Inhalation Toxicology 24:70-79.                      | 5/2013  | 0 citations added                |
|                                                   | Shopp et al. (1984). Naphthalene toxicity in CD-1 mice: general toxicology and immunotoxicology. Toxicological Sciences 4:406-419.                                    | 5/2013  | 5 citations added                |
| References obtained during the assessment process | References that had been previously added to the HERO project page for the naphthalene assessment during the development of earlier draft materials.                  | 3/2017  | 2 citations added                |
|                                                   |                                                                                                                                                                       | 1/2017  | 9 citations added                |
|                                                   |                                                                                                                                                                       | 12/2015 | 22 citations added               |

| System Used                                           | Selected Reference(s) or Sources                                                                                                                                                                                                                                                                                                                                                                                                                                                                                                                                                                                                                                                                                                                                                                                                                                                                                                                                                                                                                                                                                                                                                                                                                                                                                                                                                                                                                                                                                                                                                                                                                                                                                                                                                                                                       | Date    | Additional References Identified |
|-------------------------------------------------------|----------------------------------------------------------------------------------------------------------------------------------------------------------------------------------------------------------------------------------------------------------------------------------------------------------------------------------------------------------------------------------------------------------------------------------------------------------------------------------------------------------------------------------------------------------------------------------------------------------------------------------------------------------------------------------------------------------------------------------------------------------------------------------------------------------------------------------------------------------------------------------------------------------------------------------------------------------------------------------------------------------------------------------------------------------------------------------------------------------------------------------------------------------------------------------------------------------------------------------------------------------------------------------------------------------------------------------------------------------------------------------------------------------------------------------------------------------------------------------------------------------------------------------------------------------------------------------------------------------------------------------------------------------------------------------------------------------------------------------------------------------------------------------------------------------------------------------------|---------|----------------------------------|
|                                                       |                                                                                                                                                                                                                                                                                                                                                                                                                                                                                                                                                                                                                                                                                                                                                                                                                                                                                                                                                                                                                                                                                                                                                                                                                                                                                                                                                                                                                                                                                                                                                                                                                                                                                                                                                                                                                                        | 5/2013  | 36 citations added               |
| Search of Online Chemical Assessment-Related Websites | Searched a combination of CASRNs and synonyms on the following databases:                                                                                                                                                                                                                                                                                                                                                                                                                                                                                                                                                                                                                                                                                                                                                                                                                                                                                                                                                                                                                                                                                                                                                                                                                                                                                                                                                                                                                                                                                                                                                                                                                                                                                                                                                              | 1/2017  | 1 citation added                 |
|                                                       | American Conference of Governmental Industrial Hygienists (ACGIH): <a href="https://www.acgih.org/">https://www.acgih.org/</a>                                                                                                                                                                                                                                                                                                                                                                                                                                                                                                                                                                                                                                                                                                                                                                                                                                                                                                                                                                                                                                                                                                                                                                                                                                                                                                                                                                                                                                                                                                                                                                                                                                                                                                         | 12/2015 | 13 citations added               |
|                                                       | <p>American Industrial Hygiene Association (AIHA):</p> <p>Workplace Environmental Exposure Levels (WEELs) (<a href="https://www.tera.org/OARS/PDF_documents/OARS_WEEL_Table.pdf">https://www.tera.org/OARS/PDF_documents/OARS_WEEL_Table.pdf</a>)</p> <p>Emergency Response Planning Guidelines (ERPGs) (<a href="https://www.aiha.org/get-involved/AIHAGuidelineFoundation/EmergencyResponsePlanningGuidelines/Pages/default.aspx">https://www.aiha.org/get-involved/AIHAGuidelineFoundation/EmergencyResponsePlanningGuidelines/Pages/default.aspx</a>)</p> <p>Agency for Toxic Substances and Disease Registry (ATSDR): <a href="https://wwwn.cdc.gov/TSP/index.aspx">https://wwwn.cdc.gov/TSP/index.aspx</a></p> <p>CalEPA Office of Environmental Health Hazard Assessment (OEHHA): <a href="http://www.oehha.ca.gov/risk.html">http://www.oehha.ca.gov/risk.html</a></p> <p>OEHHA Toxicity Criteria Database (<a href="http://www.oehha.ca.gov/tcdb/index.asp">http://www.oehha.ca.gov/tcdb/index.asp</a>)</p> <p>Biomonitoring California-Priority Chemicals (<a href="https://biomonitoring.ca.gov/chemicals/priority-chemicals">https://biomonitoring.ca.gov/chemicals/priority-chemicals</a>)</p> <p>Biomonitoring California-Designated Chemicals (<a href="https://biomonitoring.ca.gov/chemicals/designated-chemicals">https://biomonitoring.ca.gov/chemicals/designated-chemicals</a>)</p> <p>Cal/Ecotox Database (<a href="https://ecotox.oehha.ca.gov/">https://ecotox.oehha.ca.gov/</a>)</p> <p>OEHHA Fact Sheets (<a href="http://www.oehha.ca.gov/public_info/facts/index.html">http://www.oehha.ca.gov/public_info/facts/index.html</a>)</p> <p>Non-cancer health effects [reference exposure levels (RELs)] (<a href="http://www.oehha.ca.gov/air/allrels.html">http://www.oehha.ca.gov/air/allrels.html</a>)</p> | 4/2012  | 19 citations added               |

| System Used | Selected Reference(s) or Sources                                                                                                                                                                                                                                                                                                                                                                                                                                                                                                                                                                                                                                                                                                                                                                                                                                                                                                                                                                                                                                                                                                                                                                                                                                                                                                                                                                                                                                                                                                                                                                                                                                                                                                                                                                                                                                                                                                                                                                                                                                                                                | Date | Additional References Identified |
|-------------|-----------------------------------------------------------------------------------------------------------------------------------------------------------------------------------------------------------------------------------------------------------------------------------------------------------------------------------------------------------------------------------------------------------------------------------------------------------------------------------------------------------------------------------------------------------------------------------------------------------------------------------------------------------------------------------------------------------------------------------------------------------------------------------------------------------------------------------------------------------------------------------------------------------------------------------------------------------------------------------------------------------------------------------------------------------------------------------------------------------------------------------------------------------------------------------------------------------------------------------------------------------------------------------------------------------------------------------------------------------------------------------------------------------------------------------------------------------------------------------------------------------------------------------------------------------------------------------------------------------------------------------------------------------------------------------------------------------------------------------------------------------------------------------------------------------------------------------------------------------------------------------------------------------------------------------------------------------------------------------------------------------------------------------------------------------------------------------------------------------------|------|----------------------------------|
|             | <p>Cancer Potency Factors (Appendix A and B)<br/> <a href="http://www.oehha.ca.gov/air/hot_spots/tsd052909.html">http://www.oehha.ca.gov/air/hot_spots/tsd052909.html</a>)</p> <p>Consumer Product Safety Commission (CPSC):<br/> <a href="http://www.cpsc.gov">http://www.cpsc.gov</a></p> <p>Centre for Chemical Safety Assessment (ECETOC):<br/> <a href="http://www.ecetoc.org/publications">http://www.ecetoc.org/publications</a></p> <p>European Chemicals Agency (ECHA):</p> <p>General site (<a href="http://echa.europa.eu/information-on-chemicals">http://echa.europa.eu/information-on-chemicals</a>)</p> <p>Registered Substances<br/> <a href="https://echa.europa.eu/information-on-chemicals/registered-substances">https://echa.europa.eu/information-on-chemicals/registered-substances</a>)</p> <p>Existing Substances Regulation (ESR)<br/> <a href="http://echa.europa.eu/information-on-chemicals/information-from-existing-substances-regulation">http://echa.europa.eu/information-on-chemicals/information-from-existing-substances-regulation</a>)</p> <p>Environment Canada:</p> <p>Toxic Substances Managed Under Canadian Environmental Protection Act<br/> <a href="http://www.ec.gc.ca/toxiques-toxics/Default.asp?lang=En&amp;n=98E80CC6-1">http://www.ec.gc.ca/toxiques-toxics/Default.asp?lang=En&amp;n=98E80CC6-1</a>)</p> <p>Final Assessments (<a href="http://www.ec.gc.ca/lcpe-cepa/default.asp?lang=En&amp;xml=09F567A7-B1EE-1FEE-73DB-8AE6C1EB7658">http://www.ec.gc.ca/lcpe-cepa/default.asp?lang=En&amp;xml=09F567A7-B1EE-1FEE-73DB-8AE6C1EB7658</a>)</p> <p>Draft Assessments (<a href="http://www.ec.gc.ca/lcpe-cepa/default.asp?lang=En&amp;xml=6892C255-5597-C162-95FC-4B905320F8C9">http://www.ec.gc.ca/lcpe-cepa/default.asp?lang=En&amp;xml=6892C255-5597-C162-95FC-4B905320F8C9</a>)</p> <p>Federal Docket: <a href="http://www.regulations.gov">www.regulations.gov</a></p> <p>Health Canada:</p> <p>Health Canada Drinking Water Documents<br/> <a href="http://www.hc-sc.gc.ca/ewh-semt/pubs/water-">http://www.hc-sc.gc.ca/ewh-semt/pubs/water-</a></p> |      |                                  |

| System Used | Selected Reference(s) or Sources                                                                                                                                                                                                                                                                                                                                                                                                                                                                                                                                                                                                                                                                                                                                                                                                                                                                                                                                                                                                                                                                                                                                                                                                                                                                                                                                                                                                                                                                                                                                                                                                                                                                                                                                                                                                                                                                                                                                                                                                                                                                                                                                            | Date | Additional References Identified |
|-------------|-----------------------------------------------------------------------------------------------------------------------------------------------------------------------------------------------------------------------------------------------------------------------------------------------------------------------------------------------------------------------------------------------------------------------------------------------------------------------------------------------------------------------------------------------------------------------------------------------------------------------------------------------------------------------------------------------------------------------------------------------------------------------------------------------------------------------------------------------------------------------------------------------------------------------------------------------------------------------------------------------------------------------------------------------------------------------------------------------------------------------------------------------------------------------------------------------------------------------------------------------------------------------------------------------------------------------------------------------------------------------------------------------------------------------------------------------------------------------------------------------------------------------------------------------------------------------------------------------------------------------------------------------------------------------------------------------------------------------------------------------------------------------------------------------------------------------------------------------------------------------------------------------------------------------------------------------------------------------------------------------------------------------------------------------------------------------------------------------------------------------------------------------------------------------------|------|----------------------------------|
|             | <p><a href="#">eau/index-eng.php#tech_doc</a>)</p> <p>Health Canada First Priority List Assessments<br/>(<a href="http://www.hc-sc.gc.ca/ewh-semt/pubs/contaminants/psl1-lsp1/index-eng.php">http://www.hc-sc.gc.ca/ewh-semt/pubs/contaminants/psl1-lsp1/index-eng.php</a>)</p> <p>Health Canada Second Priority List Assessments<br/>(<a href="http://www.hc-sc.gc.ca/ewh-semt/pubs/contaminants/psl2-lsp2/index-eng.php">http://www.hc-sc.gc.ca/ewh-semt/pubs/contaminants/psl2-lsp2/index-eng.php</a>)</p> <p>International Agency for Research on Cancer (IARC):<br/><a href="http://monographs.iarc.fr/ENG/Monographs/vol101/mono101-B02-B03.pdf">http://monographs.iarc.fr/ENG/Monographs/vol101/mono101-B02-B03.pdf</a></p> <p>International Toxicity Estimates for Risk (ITER):<br/><a href="https://iter.tera.org/">https://iter.tera.org/</a></p> <p>Japan Existing Chemical Data Base:<br/><a href="http://dra4.nihs.go.jp/mhlw_data/jsp/SearchPageENG.jsp">http://dra4.nihs.go.jp/mhlw_data/jsp/SearchPageENG.jsp</a></p> <p>National Academies of Sciences, Engineering, and Medicine (NASEM): <a href="http://www.nap.edu/">http://www.nap.edu/</a></p> <p>National Cancer Institute (NCI): <a href="http://www.cancer.gov">http://www.cancer.gov</a></p> <p>National Industrial Chemicals Notification and Assessment Scheme (NICNAS) (Australia):</p> <p>Australian Inventory of Chemical Substances (AICS)<br/>(<a href="http://www.cirs-reach.com/Inventory/Australian_Inventory_of_Chemical_Substances_AICS.html">http://www.cirs-reach.com/Inventory/Australian_Inventory_of_Chemical_Substances_AICS.html</a>)</p> <p>National Institute of Environmental Health Sciences (NIEHS): <a href="http://www.niehs.nih.gov/">http://www.niehs.nih.gov/</a></p> <p>National Institute of Occupational Safety and Health (NIOSH):</p> <p>All Workplace Safety &amp; Health Topics<br/>(<a href="http://www.cdc.gov/niosh/topics/">http://www.cdc.gov/niosh/topics/</a>)</p> <p>NIOSHTIC 2 Publications Search:<br/><a href="http://www2a.cdc.gov/nioshtic-2/">http://www2a.cdc.gov/nioshtic-2/</a></p> <p>Registry of Toxic Effects of Chemical Substances</p> |      |                                  |

| System Used | Selected Reference(s) or Sources                                                                                                                                                                                                                                                                                                                                                                                                                                                                                                                                                                                                                                                                                                                                                                                                                                                                                                                                                                                                                                                                                                                                                                                                                                                                                                                                                                                                                                                                                                                                                                                                                                                                                                                                                                                                                                                                                                                                                                                                                                                                                        | Date | Additional References Identified |
|-------------|-------------------------------------------------------------------------------------------------------------------------------------------------------------------------------------------------------------------------------------------------------------------------------------------------------------------------------------------------------------------------------------------------------------------------------------------------------------------------------------------------------------------------------------------------------------------------------------------------------------------------------------------------------------------------------------------------------------------------------------------------------------------------------------------------------------------------------------------------------------------------------------------------------------------------------------------------------------------------------------------------------------------------------------------------------------------------------------------------------------------------------------------------------------------------------------------------------------------------------------------------------------------------------------------------------------------------------------------------------------------------------------------------------------------------------------------------------------------------------------------------------------------------------------------------------------------------------------------------------------------------------------------------------------------------------------------------------------------------------------------------------------------------------------------------------------------------------------------------------------------------------------------------------------------------------------------------------------------------------------------------------------------------------------------------------------------------------------------------------------------------|------|----------------------------------|
|             | <p>(<a href="https://www.cdc.gov/niosh/rtecs/default.html">https://www.cdc.gov/niosh/rtecs/default.html</a>)</p> <p>National Institute of Technology and Evaluation Chemical Risk Information Platform (NITE-CHIRP) (Japan):<br/> <a href="http://www.safe.nite.go.jp/english/db.html">http://www.safe.nite.go.jp/english/db.html</a></p> <p>National Toxicology Program (NTP):</p> <p>Report on Carcinogens (RoC)<br/> <a href="https://ntp.niehs.nih.gov/whatwestudy/assessments/cancer/roc/index.html">https://ntp.niehs.nih.gov/whatwestudy/assessments/cancer/roc/index.html</a></p> <p>NTP Site Search (<a href="https://ntpsearch.niehs.nih.gov/">https://ntpsearch.niehs.nih.gov/</a>)</p> <p>Occupational Safety and Health Administration (OSHA):<br/> <a href="http://www.osha.gov/dts/chemicalsampling/toc/toc_chemsamp.html">http://www.osha.gov/dts/chemicalsampling/toc/toc_chemsamp.html</a></p> <p>Organisation for Economic Cooperation and Development (OECD)<sup>c</sup>:</p> <p>eChemPortal<br/> <a href="https://www.echemportal.org/echemportal/substance-search">https://www.echemportal.org/echemportal/substance-search</a></p> <p>OECD Existing Chemicals Database<br/> <a href="https://hpvchemicals.oecd.org/ui/Search.aspx">https://hpvchemicals.oecd.org/ui/Search.aspx</a></p> <p>U.S. Environmental Protection Agency (EPA):</p> <p>Acute Exposure Guideline Levels<br/> <a href="https://www.epa.gov/aegl/access-acute-exposure-guideline-levels-aegls-values#chemicals">https://www.epa.gov/aegl/access-acute-exposure-guideline-levels-aegls-values#chemicals</a></p> <p>Integrated Risk Information System (IRIS)<br/> <a href="http://www.epa.gov/iris/">http://www.epa.gov/iris/</a></p> <p>National Service Center for Environmental Publications (NSCEP) (<a href="https://www.epa.gov/nscep">https://www.epa.gov/nscep</a>)</p> <p>RfD/RfC and Carcinogen Risk Assessment Verification Endeavor (CRAVE) meeting notes</p> <p>Science Inventory (<a href="http://cfpub.epa.gov/si/">http://cfpub.epa.gov/si/</a>)</p> <p>High Production Volume Information System (HPVIS)</p> |      |                                  |

| System Used | Selected Reference(s) or Sources                                                                                                                                                                                                                                                                                                                                                                                                                                                                                                                                                                                                                                                                                                                                                                                                                                                                                                                                                                                      | Date | Additional References Identified |
|-------------|-----------------------------------------------------------------------------------------------------------------------------------------------------------------------------------------------------------------------------------------------------------------------------------------------------------------------------------------------------------------------------------------------------------------------------------------------------------------------------------------------------------------------------------------------------------------------------------------------------------------------------------------------------------------------------------------------------------------------------------------------------------------------------------------------------------------------------------------------------------------------------------------------------------------------------------------------------------------------------------------------------------------------|------|----------------------------------|
|             | <p>(<a href="https://ofmpub.epa.gov/opthpv/metadata.html">https://ofmpub.epa.gov/opthpv/metadata.html</a>)</p> <p>Chemical Data Access Tool (formerly available at <a href="http://java.epa.gov/oppt_chemical_search/">http://java.epa.gov/oppt_chemical_search/</a>; information from CDAT has been incorporated into EPA's ChemView database at <a href="https://chemview.epa.gov/chemview">https://chemview.epa.gov/chemview</a>)</p> <p>Office of Pesticide Programs<br/>(<a href="http://iaspub.epa.gov/apex/pesticides/f?p=chemicalsearch:1">http://iaspub.epa.gov/apex/pesticides/f?p=chemicalsearch:1</a>)</p> <p>U.S. Food and Drug Administration (FDA):<br/><a href="http://www.fda.gov/">http://www.fda.gov/</a></p> <p>National Center for Toxicological Research (NCTR)<br/>(<a href="http://www.fda.gov/AboutFDA/CentersOffices/OC/OfficeofScientificandMedicalPrograms/NCTR/default.htm">http://www.fda.gov/AboutFDA/CentersOffices/OC/OfficeofScientificandMedicalPrograms/NCTR/default.htm</a>)</p> |      |                                  |

<sup>a</sup> "Forward" search for records that cite included studies

<sup>b</sup> "Backward" search for records cited by included studies

<sup>c</sup> Searched for OECD High Production Volume (HPV) chemicals, Screening Information Dataset (SIDS) International Uniform Chemicals Information Database (IUCLID), and SIDS United Nations Environment Programme (UNEP)

**Table S4. Electronic screening inclusion terms for naphthalene (listed alphabetically by organ/health system)**

| Category                           | Terms              |                              |             |                     |
|------------------------------------|--------------------|------------------------------|-------------|---------------------|
| Organ/Health System Specific Terms |                    |                              |             |                     |
| Cardiovascular                     | angio              | blood AND vessel             | endotheli   | thrombus            |
|                                    | aort               | capillar                     | heart       | valve               |
|                                    | arrhythm           | cardiac, cardio, cardium     | hypertens   | vascular, vaso      |
|                                    | artery, arteri     | circulat                     | infarct     | vein, venous        |
|                                    | blood AND pressure | coronary                     | myocardi    | ventricle           |
| Dermal/<br>Integumentary<br>system | blister            | epiderm, epidermal           | nail        | sweat, perspiration |
|                                    | bulla, bullous     | erythema                     | pruritus    | tooth, teeth        |
|                                    | cutaneous          | hair                         | sebaceous   |                     |
|                                    | dermal, dermis     | keratin, kerato              | skin        |                     |
| Developmental                      | abnormalit         | fetal, fetus, foetal, foetus | parturition | terato              |
|                                    | abort              | gestation                    | perinatal   | uterus, uterine     |
|                                    | cleft              | implantation                 | postnatal   | viable, viabil      |
|                                    | congenital         | malform                      | puberty     | visceral            |
|                                    | defect             | neonat                       | pregnan     | wean                |
|                                    | development        | newborn                      | prenatal    | zygote              |
|                                    | embryo             | neural AND tube              | resorption  |                     |



| Category                                  | Terms                                                                                      |                                                                                |                                                                                                     |                                                           |
|-------------------------------------------|--------------------------------------------------------------------------------------------|--------------------------------------------------------------------------------|-----------------------------------------------------------------------------------------------------|-----------------------------------------------------------|
| <b>Organ/Health System Specific Terms</b> |                                                                                            |                                                                                |                                                                                                     |                                                           |
| Endocrine                                 | adipokine<br>adipocyt<br>adrenal<br>hormone                                                | hypothalamus<br>insulin<br>pancreas, pancreat<br>pineal                        | pituitary<br>triiodo<br>tetraiodo<br>thymus, thymic                                                 | thyro                                                     |
| Gastrointestinal                          | abdomen<br>anus, anal<br>bucca<br>bowel<br>cecum, cecal<br>colon                           | constipation<br>diarrhea<br>digestive<br>duoden<br>esophagus<br>gastric        | gastrointestinal<br>ileum, ileal, ileus<br>intestin<br>jejunum, jejunal<br>mouth<br>oral AND cavity | peptic<br>rectum, rectal<br>salivary<br>stomach<br>tongue |
| Hematologic                               | albumin<br>anemia, anemic, anaemia,<br>anaemic<br>blood<br>cholesterol<br>clot<br>coagulat | cytopenia<br>erythro<br>hemoly, haemoly<br>hemat<br>hemocoagulat<br>hemoglobin | histamine<br>hypoxemi<br>granulocyt<br>plasma<br>platelet<br>polycythemia                           | RBC (red blood cell)<br>reticulocyt<br>serum<br>thrombo   |

| Category                                  | Terms                                                                                                                     |                                                                                                                                                 |                                                                                                                                              |                                                                                                                                                                                         |
|-------------------------------------------|---------------------------------------------------------------------------------------------------------------------------|-------------------------------------------------------------------------------------------------------------------------------------------------|----------------------------------------------------------------------------------------------------------------------------------------------|-----------------------------------------------------------------------------------------------------------------------------------------------------------------------------------------|
| <b>Organ/Health System Specific Terms</b> |                                                                                                                           |                                                                                                                                                 |                                                                                                                                              |                                                                                                                                                                                         |
| Hepatic                                   | alkaline AND phosphatase<br>aminotransferase<br>bile, biliary<br>bilirubin<br>centrilobular                               | cholesta<br>cholangio<br>cirrho<br>gall AND bladder<br>glycogen                                                                                 | glutamyltransferase<br>hepat<br>hydropic<br>Ito<br>Kupffer                                                                                   | liver<br>peroxisome<br>portal, periportal<br>steatosis<br>stellate                                                                                                                      |
| Immune                                    | adenopath<br>allerg<br>anaphyla<br>antibod<br>antigen<br>asthma<br>basophil, basopenia<br>B-cell<br>cytokine<br>chemokine | complement<br>dendrocyt, dendritic<br>eosinophil, eosinopenia<br>epitope<br>globulin<br>granuloma<br>haptent<br>humoral<br>hypersensit<br>immun | inflamm<br>interferon<br>leukocyt<br>lymph<br>macrophag<br>major histocompatibility complex, MHC<br>marrow<br>mast AND cell<br>macroglobulin | monocyt<br>natural AND killer<br>neutrophil, neutropenia<br>phagocyt<br>polymorphonuclear<br>sensitize, sensitis<br>sensitivity<br>spleen, splenous<br>WBC (white blood cell)<br>T-cell |

| Category                                  | Terms                                                                                                      |                                                                                                                  |                                                                                                     |                                                                                                                      |
|-------------------------------------------|------------------------------------------------------------------------------------------------------------|------------------------------------------------------------------------------------------------------------------|-----------------------------------------------------------------------------------------------------|----------------------------------------------------------------------------------------------------------------------|
| <b>Organ/Health System Specific Terms</b> |                                                                                                            |                                                                                                                  |                                                                                                     |                                                                                                                      |
| Musculoskeletal                           | articular<br>bone<br>bursa<br>calcitonin                                                                   | cartilage<br>collagen<br>connective<br>ligament                                                                  | muscle, muscul<br>osteo<br>pyridinoline<br>skelet                                                   | tendon<br>vertebra                                                                                                   |
| Nervous                                   | autonomic<br>axon<br>behavior, behaviour<br>brain<br>CNS (central nervous system)<br>Cognitive<br>dendrite | efferent<br>electrophysiol<br>encephalo<br>fatigue<br>FOB (functional observational battery)<br>ganglia, ganglio | memory<br>myelin AND sheath<br>locomotor<br>nerve<br>nervous AND system<br>neuro<br>parasympathetic | PNS (peripheral nervous system)<br>Ranvier<br>Schwann<br>sensory, sensori<br>spinal AND cord<br>sympathetic<br>synap |
| Ocular                                    | cataract<br>cornea<br>eye                                                                                  | harderian<br>lachrymal, lacrimal<br>lens, lenticular                                                             | ocular<br>ophthalm<br>retina                                                                        |                                                                                                                      |

| Category                                  | Terms                        |                            |                     |                        |
|-------------------------------------------|------------------------------|----------------------------|---------------------|------------------------|
| <b>Organ/Health System Specific Terms</b> |                              |                            |                     |                        |
| Reproductive                              | androgen                     | fertilit                   | ova, ovum           | seminiferous           |
|                                           | breast                       | follicle                   | penis               | sexual                 |
|                                           | cervical, cervix             | FSH                        | placenta            | sperm                  |
|                                           | coagulating AND gland        | gamete                     | primordial          | sterility              |
|                                           | corpora lutea, corpus luteum | gonad                      | progesterone        | testes, testic, testis |
|                                           | endometrium                  | infertility                | prolactin           | testosterone           |
|                                           | epididym                     | lacto, lacta               | prostate            | urogenital             |
|                                           | estrogen, estradiol          | LH (luteinizing hormone)   | reproduct           | vagina                 |
|                                           | estrus, estrous              | lordosis                   | scrotum             | vulva                  |
|                                           | fallopian                    | mammar                     | seminal AND vesicle |                        |
| Respiratory                               | airway                       | cough                      | intratrach          | pharyn                 |
|                                           | alveolar                     | crackle                    | laryn               | pneumon                |
|                                           | BAL (bronchoalveolar lavage) | diffusing AND capacity     | lung                | pulmonary              |
|                                           | bleb                         | dyspnea                    | nasal               | rale                   |
|                                           | bronch                       | FEV, forced AND expiratory | nose                | respir                 |
|                                           | chest                        | FVC, forced AND vital      | olfactory           | trach                  |

| Category                                  | Terms             |                      |                                 |            |
|-------------------------------------------|-------------------|----------------------|---------------------------------|------------|
| <b>Organ/Health System Specific Terms</b> |                   |                      |                                 |            |
| Urinary                                   | alpha 2u globulin | creatinine           | kidney                          | urethra    |
|                                           | anion AND gap     | dilation, dilatation | nephro                          | uria       |
|                                           | BUN               | genitourinary        | proximal AND tubule, distal AND | urinalysis |
|                                           | bladder           | glomerul             | tubule                          | urinary    |
|                                           | Bowman's          | Henle                | renal                           | urine      |

### 3. Study evaluation methods

Table S5. Questions to guide the development of criteria for each domain in epidemiology studies

| Domain and core question                                                                                                                                                                                                          | Prompting questions                                                                                                                                                                                                                                                                                                                                                                                                                                                                                                                                                                                                    | Follow-up questions                                                                                                                                                                                                                                                                                                                                                                                                                 | Considerations that apply to most exposures and outcomes                                                                                                                                                                                                                                                                                                                                                                                                                                                                                                                                                                                                  |
|-----------------------------------------------------------------------------------------------------------------------------------------------------------------------------------------------------------------------------------|------------------------------------------------------------------------------------------------------------------------------------------------------------------------------------------------------------------------------------------------------------------------------------------------------------------------------------------------------------------------------------------------------------------------------------------------------------------------------------------------------------------------------------------------------------------------------------------------------------------------|-------------------------------------------------------------------------------------------------------------------------------------------------------------------------------------------------------------------------------------------------------------------------------------------------------------------------------------------------------------------------------------------------------------------------------------|-----------------------------------------------------------------------------------------------------------------------------------------------------------------------------------------------------------------------------------------------------------------------------------------------------------------------------------------------------------------------------------------------------------------------------------------------------------------------------------------------------------------------------------------------------------------------------------------------------------------------------------------------------------|
| <p><b>Exposure measurement</b></p> <p>Does the exposure measure reliably distinguish between levels of exposure in a time window considered most relevant for a causal effect with respect to the development of the outcome?</p> | <p>For all:</p> <ul style="list-style-type: none"> <li>Does the exposure measure capture the variability in exposure among the participants, considering intensity, frequency, and duration of exposure?</li> <li>Does the exposure measure reflect a relevant time window? If not, can the relationship between measures in this time and the relevant time window be estimated reliably?</li> <li>Was the exposure measurement likely to be affected by a knowledge of the outcome?</li> <li>Was the exposure measurement likely to be affected by the presence of the outcome (i.e., reverse causality)?</li> </ul> | <p>Is the degree of exposure misclassification likely to vary by exposure level?</p> <p>If the correlation between exposure measurements is <i>moderate</i>, is there an adequate statistical approach to ameliorate variability in measurements?</p> <p>If there is a concern about the potential for bias, what is the predicted direction or distortion of the bias on the effect estimate (if there is enough information)?</p> | <p>These considerations require customization to the exposure and outcome (relevant timing of exposure)</p> <p><b>Good</b></p> <ul style="list-style-type: none"> <li>Valid exposure assessment methods used, which represent the etiologically relevant time period of interest.</li> <li>Exposure misclassification is expected to be minimal.</li> </ul> <p><b>Adequate</b></p> <ul style="list-style-type: none"> <li>Valid exposure assessment methods used, which represent the etiologically relevant time period of interest.</li> <li>Exposure misclassification may exist but is not expected to greatly change the effect estimate.</li> </ul> |

| Domain and core question                                                                                                                                                                                                                          | Prompting questions                                                                                                                                                                                                                                                                                                                                                                                                                                                                                                                                                                                                                                                                                                               | Follow-up questions                                                                                                                                                                                                                                                                                                                                                                                                                             | Considerations that apply to most exposures and outcomes                                                                                                                                                                                                                                                                                                                                                                                                                                                                                                                                                                                                                                                                                                                                                                                                                                                                                                                                                                                                            |
|---------------------------------------------------------------------------------------------------------------------------------------------------------------------------------------------------------------------------------------------------|-----------------------------------------------------------------------------------------------------------------------------------------------------------------------------------------------------------------------------------------------------------------------------------------------------------------------------------------------------------------------------------------------------------------------------------------------------------------------------------------------------------------------------------------------------------------------------------------------------------------------------------------------------------------------------------------------------------------------------------|-------------------------------------------------------------------------------------------------------------------------------------------------------------------------------------------------------------------------------------------------------------------------------------------------------------------------------------------------------------------------------------------------------------------------------------------------|---------------------------------------------------------------------------------------------------------------------------------------------------------------------------------------------------------------------------------------------------------------------------------------------------------------------------------------------------------------------------------------------------------------------------------------------------------------------------------------------------------------------------------------------------------------------------------------------------------------------------------------------------------------------------------------------------------------------------------------------------------------------------------------------------------------------------------------------------------------------------------------------------------------------------------------------------------------------------------------------------------------------------------------------------------------------|
| <p><b><u>Exposure measurement</u></b><br/>Does the exposure measure reliably distinguish between levels of exposure in a time window considered most relevant for a causal effect with respect to the development of the outcome? (continued)</p> | <p>For case-control studies of occupational exposures:</p> <ul style="list-style-type: none"> <li>• Is exposure based on a comprehensive job history describing tasks, setting, time period, and use of specific materials?</li> </ul> <p>For biomarkers of exposure, general population:</p> <ul style="list-style-type: none"> <li>• Is a standard assay used? What are the intra- and interassay coefficients of variation? Is the assay likely to be affected by contamination? Are values less than the limit of detection dealt with adequately?</li> <li>• What exposure time period is reflected by the biomarker? If the half-life is short, what is the correlation between serial measurements of exposure?</li> </ul> | <p>Is the degree of exposure misclassification likely to vary by exposure level?</p> <p>If the correlation between exposure measurements is <i>moderate</i>, is there an adequate statistical approach to ameliorate variability in measurements?</p> <p>If there is a concern about the potential for bias, what is the predicted direction or distortion of the bias on the effect estimate (if there is enough information)? (continued)</p> | <p><b>Deficient</b></p> <ul style="list-style-type: none"> <li>• Valid exposure assessment methods used, which represent the etiologically relevant time period of interest. Specific knowledge about the exposure and outcome raise concerns about reverse causality, but there is uncertainty whether it is influencing the effect estimate.</li> <li>• Exposed groups are expected to contain a notable proportion of unexposed or minimally exposed individuals, the method did not capture important temporal or spatial variation, or there is other evidence of exposure misclassification that would be expected to notably change the effect estimate.</li> </ul> <p><b>Critically deficient</b></p> <ul style="list-style-type: none"> <li>• Exposure measurement does not characterize the etiologically relevant time period of exposure or is not valid.</li> <li>• There is evidence that reverse causality is very likely to account for the observed association.</li> <li>• Exposure measurement was not independent of outcome status.</li> </ul> |

| Domain and core question                                                                                                                                 | Prompting questions                                                                                                                                                                                                                                                                                                                                                                                                                                                                                                                                                                                                                                                                                                                                                                                                                                                                                                                                                                                                                                                                                                                                                                                                                                                                                                | Follow-up questions                                                                                                                                                                                                               | Considerations that apply to most exposures and outcomes                                                                                                                                                                                                                                                                                                                                                                                                                                                                                                                                                                                                                                                                                                                                                                                                                                                                                                                                                                                                                                                                                                                                                                                                                                                                         |
|----------------------------------------------------------------------------------------------------------------------------------------------------------|--------------------------------------------------------------------------------------------------------------------------------------------------------------------------------------------------------------------------------------------------------------------------------------------------------------------------------------------------------------------------------------------------------------------------------------------------------------------------------------------------------------------------------------------------------------------------------------------------------------------------------------------------------------------------------------------------------------------------------------------------------------------------------------------------------------------------------------------------------------------------------------------------------------------------------------------------------------------------------------------------------------------------------------------------------------------------------------------------------------------------------------------------------------------------------------------------------------------------------------------------------------------------------------------------------------------|-----------------------------------------------------------------------------------------------------------------------------------------------------------------------------------------------------------------------------------|----------------------------------------------------------------------------------------------------------------------------------------------------------------------------------------------------------------------------------------------------------------------------------------------------------------------------------------------------------------------------------------------------------------------------------------------------------------------------------------------------------------------------------------------------------------------------------------------------------------------------------------------------------------------------------------------------------------------------------------------------------------------------------------------------------------------------------------------------------------------------------------------------------------------------------------------------------------------------------------------------------------------------------------------------------------------------------------------------------------------------------------------------------------------------------------------------------------------------------------------------------------------------------------------------------------------------------|
| <p><b>Outcome ascertainment</b></p> <p>Does the outcome measure reliably distinguish the presence or absence (or degree of severity) of the outcome?</p> | <p>For all:</p> <ul style="list-style-type: none"> <li>Is outcome ascertainment likely to be affected by knowledge of, or presence of, exposure (e.g., consider access to health care, if based on self-reported history of diagnosis)?</li> </ul> <p>For case-control studies:</p> <ul style="list-style-type: none"> <li>Is the comparison group without the outcome (e.g., controls in a case-control study) based on objective criteria with little or no likelihood of inclusion of people with the disease?</li> </ul> <p>For mortality measures:</p> <ul style="list-style-type: none"> <li>How well does cause of death data reflect occurrence of the disease in an individual? How well do mortality data reflect incidence of the disease?</li> </ul> <p>For diagnosis of disease measures:</p> <ul style="list-style-type: none"> <li>Is the diagnosis based on standard clinical criteria? If it is based on self-report of the diagnosis, what is the validity of this measure?</li> </ul> <p>For laboratory-based measures (e.g., hormone levels):</p> <ul style="list-style-type: none"> <li>Is a standard assay used? Does the assay have an acceptable level of interassay variability? Is the sensitivity of the assay appropriate for the outcome measure in this study population?</li> </ul> | <p>Is there a concern that any outcome misclassification is nondifferential, differential, or both?</p> <p>What is the predicted direction or distortion of the bias on the effect estimate (if there is enough information)?</p> | <p>These considerations require customization to the outcome.</p> <p><b>Good</b></p> <ul style="list-style-type: none"> <li>High certainty in the outcome definition (i.e., specificity and sensitivity), minimal concerns with respect to misclassification.</li> <li>Assessment instrument was validated in a population comparable to the one from which the study group was selected.</li> </ul> <p><b>Adequate</b></p> <ul style="list-style-type: none"> <li><i>Moderate</i> confidence that outcome definition was specific and sensitive, some uncertainty with respect to misclassification but not expected to greatly change the effect estimate.</li> <li>Assessment instrument was validated but not necessarily in a population comparable to the study group.</li> </ul> <p><b>Deficient</b></p> <ul style="list-style-type: none"> <li>Outcome definition was not specific or sensitive.</li> <li>Uncertainty regarding validity of assessment instrument.</li> </ul> <p><b>Critically deficient</b></p> <ul style="list-style-type: none"> <li>Invalid/insensitive marker of outcome.</li> <li>Outcome ascertainment is very likely to be affected by knowledge of, or presence of, exposure.</li> </ul> <p>Note: Lack of blinding should not be automatically construed to be <i>critically deficient</i>.</p> |



| Domain and core question                                                                                                                                                      | Prompting questions                                                                                                                                                                                                                                                                                                                                                                                                                                                                                                                                                                                                                                                                                                                                                                                                                                                                                                                                                                                                                                                                                                                                                       | Follow-up questions                                                                                                                                                                                                                                                                                                                                                                                                                                                                                       | Considerations that apply to most exposures and outcomes                                                                                                                                                                                                                                                                                                                                                                                                                                                                                                                                                                                                                                                                                                                                                                                                                                                                                                                                                                                                                                       |
|-------------------------------------------------------------------------------------------------------------------------------------------------------------------------------|---------------------------------------------------------------------------------------------------------------------------------------------------------------------------------------------------------------------------------------------------------------------------------------------------------------------------------------------------------------------------------------------------------------------------------------------------------------------------------------------------------------------------------------------------------------------------------------------------------------------------------------------------------------------------------------------------------------------------------------------------------------------------------------------------------------------------------------------------------------------------------------------------------------------------------------------------------------------------------------------------------------------------------------------------------------------------------------------------------------------------------------------------------------------------|-----------------------------------------------------------------------------------------------------------------------------------------------------------------------------------------------------------------------------------------------------------------------------------------------------------------------------------------------------------------------------------------------------------------------------------------------------------------------------------------------------------|------------------------------------------------------------------------------------------------------------------------------------------------------------------------------------------------------------------------------------------------------------------------------------------------------------------------------------------------------------------------------------------------------------------------------------------------------------------------------------------------------------------------------------------------------------------------------------------------------------------------------------------------------------------------------------------------------------------------------------------------------------------------------------------------------------------------------------------------------------------------------------------------------------------------------------------------------------------------------------------------------------------------------------------------------------------------------------------------|
| <p><b><u>Participant selection</u></b><br/>Is there evidence that selection into or out of the study (or analysis sample) was jointly related to exposure and to outcome?</p> | <p>For longitudinal cohort:</p> <ul style="list-style-type: none"> <li>Did participants volunteer for the cohort based on knowledge of exposure and/or preclinical disease symptoms? Was entry into the cohort or continuation in the cohort related to exposure and outcome?</li> </ul> <p>For occupational cohort:</p> <ul style="list-style-type: none"> <li>Did entry into the cohort begin with the start of the exposure?</li> <li>Was follow-up or outcome assessment incomplete, and if so, was follow-up related to both exposure and outcome status?</li> <li>Could exposure produce symptoms that would result in a change in work assignment/work status (“healthy worker survivor effect”)?</li> </ul> <p>For case-control study:</p> <ul style="list-style-type: none"> <li>Were controls representative of population and time periods from which cases were drawn?</li> <li>Are hospital controls selected from a group whose reason for admission is independent of exposure?</li> <li>Could recruitment strategies, eligibility criteria, or participation rates result in differential participation relating to both disease and exposure?</li> </ul> | <p>Were differences in participant enrollment and follow-up evaluated to assess bias?</p> <p>If there is a concern about the potential for bias, what is the predicted direction or distortion of the bias on the effect estimate (if there is enough information)?</p> <p>Were appropriate analyses performed to address changing exposures over time in relation to symptoms?</p> <p>Is there a comparison of participants and nonparticipants to address whether differential selection is likely?</p> | <p>These considerations may require customization to the outcome. This could include determining what study designs effectively allow analyses of associations appropriate to the outcome measures (e.g., design to capture incident vs. prevalent cases, design to capture early pregnancy loss).</p> <p><b>Good</b></p> <ul style="list-style-type: none"> <li>Minimal concern for selection bias based on description of recruitment process (e.g., selection of comparison population, population-based random sample selection, recruitment from sampling frame including current and previous employees).</li> <li>Exclusion and inclusion criteria specified and would not induce bias.</li> <li>Participation rate is reported at all steps of study (e.g., initial enrollment, follow-up, selection into analysis sample). If rate is not high, there is appropriate rationale for why it is unlikely to be related to exposure (e.g., comparison between participants and nonparticipants or other available information indicates differential selection is not likely).</li> </ul> |

| Domain and core question                                                                                                                                                                  | Prompting questions                                                                                                                                                                         | Follow-up questions                                                                                                                                                                                                                                                                                                                                                                                                                                                                                                   | Considerations that apply to most exposures and outcomes                                                                                                                                                                                                                                                                                                                                                                                                                                                                                                                                                                                                                                                                                                                                                                                                                                                                                                                                                                                                                                                                                                                                                                                                                                                               |
|-------------------------------------------------------------------------------------------------------------------------------------------------------------------------------------------|---------------------------------------------------------------------------------------------------------------------------------------------------------------------------------------------|-----------------------------------------------------------------------------------------------------------------------------------------------------------------------------------------------------------------------------------------------------------------------------------------------------------------------------------------------------------------------------------------------------------------------------------------------------------------------------------------------------------------------|------------------------------------------------------------------------------------------------------------------------------------------------------------------------------------------------------------------------------------------------------------------------------------------------------------------------------------------------------------------------------------------------------------------------------------------------------------------------------------------------------------------------------------------------------------------------------------------------------------------------------------------------------------------------------------------------------------------------------------------------------------------------------------------------------------------------------------------------------------------------------------------------------------------------------------------------------------------------------------------------------------------------------------------------------------------------------------------------------------------------------------------------------------------------------------------------------------------------------------------------------------------------------------------------------------------------|
| <p><b><u>Participant selection</u></b><br/>Is there evidence that selection into or out of the study (or analysis sample) was jointly related to exposure and to outcome? (continued)</p> | <p>For population based-survey:</p> <ul style="list-style-type: none"> <li>Was recruitment based on advertisement to people with knowledge of exposure, outcome, and hypothesis?</li> </ul> | <p>Were differences in participant enrollment and follow-up evaluated to assess bias?</p> <p>If there is a concern about the potential for bias, what is the predicted direction or distortion of the bias on the effect estimate (if there is enough information)?</p> <p>Were appropriate analyses performed to address changing exposures over time in relation to symptoms?</p> <p>Is there a comparison of participants and nonparticipants to address whether differential selection is likely? (continued)</p> | <p><b>Adequate</b></p> <ul style="list-style-type: none"> <li>Enough of a description of the recruitment process to be comfortable that there is no serious risk of bias.</li> <li>Inclusion and exclusion criteria specified and would not induce bias.</li> <li>Participation rate is incompletely reported but available information indicates participation is unlikely to be related to exposure.</li> </ul> <p><b>Deficient</b></p> <ul style="list-style-type: none"> <li>Little information on recruitment process, selection strategy, sampling framework and/or participation OR aspects of these processes raises the potential for bias (e.g., healthy worker effect, survivor bias).</li> </ul> <p><b>Critically deficient</b></p> <ul style="list-style-type: none"> <li>Aspects of the processes for recruitment, selection strategy, sampling framework, or participation result in concern that selection bias is likely to have had a large impact on effect estimates (e.g., convenience sample with no information about recruitment and selection, cases and controls are recruited from different sources with different likelihood of exposure, recruitment materials stated outcome of interest and potential participants are aware of or are concerned about specific exposures).</li> </ul> |

| Domain and core question                                                           | Prompting questions                                                                                                                                                                                                                                                                                                                                                                                                                                                                                                                                                                                                                                                                                                          | Follow-up questions                                                                                                                                                           | Considerations that apply to most exposures and outcomes                                                                                                                                                                                                                                                                                                                                                                                                                                                                                                                                                                                                                                                                                                                                                                                                                                                                                                                                                                                                                                                                                                                                                                                                                                                                                                                                                                                                                                                                                                                                                                                             |
|------------------------------------------------------------------------------------|------------------------------------------------------------------------------------------------------------------------------------------------------------------------------------------------------------------------------------------------------------------------------------------------------------------------------------------------------------------------------------------------------------------------------------------------------------------------------------------------------------------------------------------------------------------------------------------------------------------------------------------------------------------------------------------------------------------------------|-------------------------------------------------------------------------------------------------------------------------------------------------------------------------------|------------------------------------------------------------------------------------------------------------------------------------------------------------------------------------------------------------------------------------------------------------------------------------------------------------------------------------------------------------------------------------------------------------------------------------------------------------------------------------------------------------------------------------------------------------------------------------------------------------------------------------------------------------------------------------------------------------------------------------------------------------------------------------------------------------------------------------------------------------------------------------------------------------------------------------------------------------------------------------------------------------------------------------------------------------------------------------------------------------------------------------------------------------------------------------------------------------------------------------------------------------------------------------------------------------------------------------------------------------------------------------------------------------------------------------------------------------------------------------------------------------------------------------------------------------------------------------------------------------------------------------------------------|
| <p><b>Confounding</b><br/>Is confounding of the effect of the exposure likely?</p> | <p>Is confounding adequately addressed by considerations in:</p> <ul style="list-style-type: none"> <li>• Participant selection (matching or restriction)?</li> <li>• Accurate information on potential confounders and statistical adjustment procedures?</li> <li>• Lack of association between confounder and outcome, or confounder and exposure in the study?</li> <li>• Information from other sources?</li> </ul> <p>Is the assessment of confounders based on a thoughtful review of published literature, potential relationships (e.g., as can be gained through directed acyclic graphing), and minimizing potential overcontrol (e.g., inclusion of a variable on the pathway between exposure and outcome)?</p> | <p>If there is a concern about the potential for bias, what is the predicted direction or distortion of the bias on the effect estimate (if there is enough information)?</p> | <p>These considerations require customization to the exposure and outcome, but this may be limited to identifying key covariates.</p> <p><b>Good</b></p> <ul style="list-style-type: none"> <li>• Conveys strategy for identifying key confounders. This may include: a priori biological considerations, published literature, causal diagrams, or statistical analyses; with recognition that not all “risk factors” are confounders.</li> <li>• Inclusion of potential confounders in statistical models not based solely on statistical significance criteria (e.g., <math>p &lt; 0.05</math> from stepwise regression).</li> <li>• Does not include variables in the models that are likely to be influential colliders or intermediates on the causal pathway.</li> <li>• Key confounders are evaluated appropriately and considered to be unlikely sources of substantial confounding. This often will include: <ul style="list-style-type: none"> <li>○ Presenting the distribution of potential confounders by levels of the exposure of interest and/or the outcomes of interest (with amount of missing data noted);</li> <li>○ Consideration that potential confounders were rare among the study population, or were expected to be poorly correlated with exposure of interest;</li> <li>○ Consideration of the most relevant functional forms of potential confounders;</li> <li>○ Examination of the potential impact of measurement error or missing data on confounder adjustment;</li> <li>○ Presenting a progression of model results with adjustments for different potential confounders, if warranted.</li> </ul> </li> </ul> |

| Domain and core question                                                                       | Prompting questions                                                                                                                                                                                                                                                                                                                                                                                                                                                                                                                                                                                                                                                                                                                      | Follow-up questions                                                                                                                                                                       | Considerations that apply to most exposures and outcomes                                                                                                                                                                                                                                                                                                                                                                                                                                                                                                                                                                                                                                                                                                                                                                                                                                                                                                                                                                                                                                                                                                                                                                                                                                                                                                                                                                                                                                                                                                                                               |
|------------------------------------------------------------------------------------------------|------------------------------------------------------------------------------------------------------------------------------------------------------------------------------------------------------------------------------------------------------------------------------------------------------------------------------------------------------------------------------------------------------------------------------------------------------------------------------------------------------------------------------------------------------------------------------------------------------------------------------------------------------------------------------------------------------------------------------------------|-------------------------------------------------------------------------------------------------------------------------------------------------------------------------------------------|--------------------------------------------------------------------------------------------------------------------------------------------------------------------------------------------------------------------------------------------------------------------------------------------------------------------------------------------------------------------------------------------------------------------------------------------------------------------------------------------------------------------------------------------------------------------------------------------------------------------------------------------------------------------------------------------------------------------------------------------------------------------------------------------------------------------------------------------------------------------------------------------------------------------------------------------------------------------------------------------------------------------------------------------------------------------------------------------------------------------------------------------------------------------------------------------------------------------------------------------------------------------------------------------------------------------------------------------------------------------------------------------------------------------------------------------------------------------------------------------------------------------------------------------------------------------------------------------------------|
| <p><b>Confounding</b><br/>Is confounding of the effect of the exposure likely? (continued)</p> | <p>Is confounding adequately addressed by considerations in:</p> <ul style="list-style-type: none"> <li>• Participant selection (matching or restriction)?</li> <li>• Accurate information on potential confounders and statistical adjustment procedures?</li> <li>• Lack of association between confounder and outcome, or confounder and exposure in the study?</li> <li>• Information from other sources?</li> </ul> <p>Is the assessment of confounders based on a thoughtful review of published literature, potential relationships (e.g., as can be gained through directed acyclic graphing), and minimizing potential overcontrol (e.g., inclusion of a variable on the pathway between exposure and outcome)? (continued)</p> | <p>If there is a concern about the potential for bias, what is the predicted direction or distortion of the bias on the effect estimate (if there is enough information)? (continued)</p> | <p><b>Adequate</b><br/>Similar to <i>good</i> but may not have included all key confounders, or less detail may be available on the evaluation of confounders (e.g., subbullets in <i>good</i>). It is possible that residual confounding could explain part of the observed effect, but concern is minimal.</p> <p><b>Deficient</b></p> <ul style="list-style-type: none"> <li>• Does not include variables in the models that are likely to be influential colliders or intermediates on the causal pathway.</li> <li>• And any of the following: <ul style="list-style-type: none"> <li>○ The potential for bias to explain some of the results is high based on an inability to rule out residual confounding, such as a lack of demonstration that key confounders of the exposure-outcome relationships were considered;</li> <li>○ Descriptive information on key confounders (e.g., their relationship relative to the outcomes and exposure levels) are not presented; or</li> <li>○ Strategy of evaluating confounding is unclear or is not recommended (e.g., only based on statistical significance criteria or stepwise regression [forward or backward elimination]).</li> </ul> </li> </ul> <p><b>Critically deficient</b></p> <ul style="list-style-type: none"> <li>• Includes variables in the models that are colliders and/or intermediates in the causal pathway, indicating that substantial bias is likely from this adjustment; or</li> <li>• Confounding is likely present and not accounted for, indicating that all of the results were most likely due to bias.</li> </ul> |

| Domain and core question                                                                                                               | Prompting questions                                                                                                                                                                                                                                                                                                                                                                                                                                                                                                                                                                        | Follow-up questions                                                                                                                                                           | Considerations that apply to most exposures and outcomes                                                                                                                                                                                                                                                                                                                                                                                                                                                                                                                                                                                                                                                                                                                                                                                                                                                                                                                                                                                                                                                                                                                                                                                                                                                                                                                                        |
|----------------------------------------------------------------------------------------------------------------------------------------|--------------------------------------------------------------------------------------------------------------------------------------------------------------------------------------------------------------------------------------------------------------------------------------------------------------------------------------------------------------------------------------------------------------------------------------------------------------------------------------------------------------------------------------------------------------------------------------------|-------------------------------------------------------------------------------------------------------------------------------------------------------------------------------|-------------------------------------------------------------------------------------------------------------------------------------------------------------------------------------------------------------------------------------------------------------------------------------------------------------------------------------------------------------------------------------------------------------------------------------------------------------------------------------------------------------------------------------------------------------------------------------------------------------------------------------------------------------------------------------------------------------------------------------------------------------------------------------------------------------------------------------------------------------------------------------------------------------------------------------------------------------------------------------------------------------------------------------------------------------------------------------------------------------------------------------------------------------------------------------------------------------------------------------------------------------------------------------------------------------------------------------------------------------------------------------------------|
| <p><b>Analysis</b><br/>Does the analysis strategy and presentation convey the necessary familiarity with the data and assumptions?</p> | <ul style="list-style-type: none"> <li>• Are missing outcome, exposure, and covariate data recognized, and if necessary, accounted for in the analysis?</li> <li>• Does the analysis appropriately consider variable distributions and modeling assumptions?</li> <li>• Does the analysis appropriately consider subgroups of interest (e.g., based on variability in exposure level or duration or susceptibility)?</li> <li>• Is an appropriate analysis used for the study design?</li> <li>• Is effect modification considered, based on considerations developed a priori?</li> </ul> | <p>If there is a concern about the potential for bias, what is the predicted direction or distortion of the bias on the effect estimate (if there is enough information)?</p> | <p>These considerations may require customization to the outcome. This could include the optimal characterization of the outcome variable and ideal statistical test (e.g., Cox regression).</p> <p><b>Good</b></p> <ul style="list-style-type: none"> <li>• Use of an optimal characterization of the outcome variable.</li> <li>• Quantitative results presented (effect estimates and confidence limits or variability in estimates; i.e., not presented only as a <i>p</i>-value or “significant”/“not significant”).</li> <li>• Descriptive information about outcome and exposure provided (where applicable).</li> <li>• Amount of missing data noted and addressed appropriately (discussion of selection issues—missing at random vs. differential).</li> <li>• Where applicable, for exposure, includes LOD (and percentage below the LOD), and decision to use log transformation.</li> <li>• Includes analyses that address robustness of findings, e.g., examination of exposure-response (explicit consideration of nonlinear possibilities, quadratic, spline, or threshold/ceiling effects included, when feasible); relevant sensitivity analyses; effect modification examined based only on a priori rationale with sufficient numbers.</li> <li>• No deficiencies in analysis evident. Discussion of some details may be absent (e.g., examination of outliers).</li> </ul> |

| Domain and core question                                                                                                                               | Prompting questions                                                                                                                                                   | Follow-up questions                                                                                                                                                                           | Considerations that apply to most exposures and outcomes                                                                                                                                                                                                                                                                                                                                                                                                                                                                                                                                                                                                                                                                                                                                                                                                                                                                                                                                                                                                                                                                                                                                                                                                                   |
|--------------------------------------------------------------------------------------------------------------------------------------------------------|-----------------------------------------------------------------------------------------------------------------------------------------------------------------------|-----------------------------------------------------------------------------------------------------------------------------------------------------------------------------------------------|----------------------------------------------------------------------------------------------------------------------------------------------------------------------------------------------------------------------------------------------------------------------------------------------------------------------------------------------------------------------------------------------------------------------------------------------------------------------------------------------------------------------------------------------------------------------------------------------------------------------------------------------------------------------------------------------------------------------------------------------------------------------------------------------------------------------------------------------------------------------------------------------------------------------------------------------------------------------------------------------------------------------------------------------------------------------------------------------------------------------------------------------------------------------------------------------------------------------------------------------------------------------------|
| <p><b>Analysis</b><br/>Does the analysis strategy and presentation convey the necessary familiarity with the data and assumptions?<br/>(continued)</p> | <ul style="list-style-type: none"> <li>Does the study include additional analyses addressing potential biases or limitations (i.e., sensitivity analyses)?</li> </ul> | <p>If there is a concern about the potential for bias, what is the predicted direction or distortion of the bias on the effect estimate (if there is enough information)?<br/>(continued)</p> | <p><b>Adequate</b><br/>Same as <i>good</i>, except:</p> <ul style="list-style-type: none"> <li>Descriptive information about exposure provided (where applicable) but may be incomplete; might not have discussed missing data, cutpoints, or shape of distribution.</li> <li>Includes analyses that address robustness of findings (examples in <i>good</i>), but some important analyses are not performed.</li> </ul> <p><b>Deficient</b></p> <ul style="list-style-type: none"> <li>Does not conduct analysis using optimal characterization of the outcome variable.</li> <li>Descriptive information about exposure levels not provided (where applicable).</li> <li>Effect estimate and <i>p</i>-value presented, without standard error or confidence interval.</li> <li>Results presented as statistically “significant”/“not significant.”</li> </ul> <p><b>Critically deficient</b></p> <ul style="list-style-type: none"> <li>Results of analyses of effect modification examined without clear a priori rationale and without providing main/principal effects (e.g., presentation only of statistically significant interactions that were not hypothesis driven).</li> <li>Analysis methods are not appropriate for design or data of the study.</li> </ul> |

| Domain and core question                                                                         | Prompting questions                                                                                                                                                                                                                                                                                                    | Follow-up questions                                                                                                                                                           | Considerations that apply to most exposures and outcomes                                                                                                                                                                                                                                                                                                                                                                                                                                                                                                                                                                                                                                                                                                                                                                                                                                                                                                                                                                                                                                          |
|--------------------------------------------------------------------------------------------------|------------------------------------------------------------------------------------------------------------------------------------------------------------------------------------------------------------------------------------------------------------------------------------------------------------------------|-------------------------------------------------------------------------------------------------------------------------------------------------------------------------------|---------------------------------------------------------------------------------------------------------------------------------------------------------------------------------------------------------------------------------------------------------------------------------------------------------------------------------------------------------------------------------------------------------------------------------------------------------------------------------------------------------------------------------------------------------------------------------------------------------------------------------------------------------------------------------------------------------------------------------------------------------------------------------------------------------------------------------------------------------------------------------------------------------------------------------------------------------------------------------------------------------------------------------------------------------------------------------------------------|
| <p><b>Selective reporting</b><br/>Is there reason to be concerned about selective reporting?</p> | <ul style="list-style-type: none"> <li>• Were results provided for all the primary analyses described in the methods section?</li> <li>• Is there appropriate justification for restricting the amount and type of results that are shown?</li> <li>• Are only statistically significant results presented?</li> </ul> | <p>If there is a concern about the potential for bias, what is the predicted direction or distortion of the bias on the effect estimate (if there is enough information)?</p> | <p>These considerations generally do not require customization and may have fewer than four levels.</p> <p><b>Good</b></p> <ul style="list-style-type: none"> <li>• The results reported by study authors are consistent with the primary and secondary analyses described in a registered protocol or methods paper.</li> </ul> <p><b>Adequate</b></p> <ul style="list-style-type: none"> <li>• The authors described their primary (and secondary) analyses in the methods section and results were reported for all primary analyses.</li> </ul> <p><b>Deficient</b></p> <ul style="list-style-type: none"> <li>• Concerns were raised based on previous publications, a methods paper, or a registered protocol indicating that analyses were planned or conducted that were not reported, or that hypotheses originally considered to be secondary were represented as primary in the reviewed paper.</li> <li>• Only subgroup analyses were reported suggesting that results for the entire group were omitted.</li> <li>• Only statistically significant results were reported.</li> </ul> |

| Domain and core question                                                                                                   | Prompting questions                                                                                                                                                                                                                                                                                                                                                                                                 | Follow-up questions | Considerations that apply to most exposures and outcomes                                                                                                                                                                                                                                                                                                                                                                                                                                                                                                                                                                                                                                                                                                                                                                                                                                                                                                                                                                                                                                                                                                                                                                                                                             |
|----------------------------------------------------------------------------------------------------------------------------|---------------------------------------------------------------------------------------------------------------------------------------------------------------------------------------------------------------------------------------------------------------------------------------------------------------------------------------------------------------------------------------------------------------------|---------------------|--------------------------------------------------------------------------------------------------------------------------------------------------------------------------------------------------------------------------------------------------------------------------------------------------------------------------------------------------------------------------------------------------------------------------------------------------------------------------------------------------------------------------------------------------------------------------------------------------------------------------------------------------------------------------------------------------------------------------------------------------------------------------------------------------------------------------------------------------------------------------------------------------------------------------------------------------------------------------------------------------------------------------------------------------------------------------------------------------------------------------------------------------------------------------------------------------------------------------------------------------------------------------------------|
| <p><b><u>Sensitivity</u></b><br/>Is there a concern that sensitivity of the study is not adequate to detect an effect?</p> | <ul style="list-style-type: none"> <li>• Is the exposure range adequate?</li> <li>• Was the appropriate population included?</li> <li>• Was the length of follow-up adequate?<br/>Is the time/age of outcome ascertainment optimal given the interval of exposure and the health outcome?</li> <li>• Are there other aspects related to risk of bias or otherwise that raise concerns about sensitivity?</li> </ul> |                     | <p>These considerations may require customization to the exposure and outcome and may have fewer than four levels. Some study features that affect study sensitivity may have already been included in the other evaluation domains. Other features that have not been addressed should be included here. Some examples include:</p> <p><b>Adequate</b></p> <ul style="list-style-type: none"> <li>• The range of exposure levels provides adequate variability to evaluate primary hypotheses in study.</li> <li>• The population was exposed to levels expected to have an impact on response.</li> <li>• The study population was sensitive to the development of the outcomes of interest (e.g., ages, life stage, sex).</li> <li>• The timing of outcome ascertainment was appropriate given expected latency for outcome development (i.e., adequate follow-up interval).</li> <li>• The study was adequately powered to observe an effect.</li> <li>• No other concerns raised regarding study sensitivity.</li> </ul> <p><b>Deficient</b></p> <ul style="list-style-type: none"> <li>• Concerns were raised about the issues described for <i>good</i> that are expected to notably decrease the sensitivity of the study to detect associations for the outcome.</li> </ul> |



**Table S6. Information relevant to evaluation domains for epidemiology studies**

| <b>Domain</b>         | <b>Types of information that may need to be collected or are important for evaluating the domain</b>                                                                                                                                                                                                                                                                                                             |
|-----------------------|------------------------------------------------------------------------------------------------------------------------------------------------------------------------------------------------------------------------------------------------------------------------------------------------------------------------------------------------------------------------------------------------------------------|
| Exposure measurement  | Source(s) of exposure (e.g., consumer products, occupational, an industrial accident) and source(s) of exposure data, blinding to outcome, level of detail for job history data, when measurements were taken, type of biomarker(s), assay information, reliability data from repeat measures studies, validation studies.                                                                                       |
| Outcome ascertainment | Source of outcome (effect) measure, blinding to exposure status or level, how measured/classified, incident vs. prevalent disease, evidence from validation studies, prevalence (or distribution summary statistics for continuous measures).                                                                                                                                                                    |
| Participant selection | Study design, where and when was the study conducted, and who was included? Recruitment process, exclusion and inclusion criteria, type of controls, total eligible, comparison between participants and nonparticipants (or followed and not followed), and final analysis group. Does the study include potential susceptible populations or life stages (see discussion in Section 9)?                        |
| Confounding           | Background research on key confounders for specific populations or settings; participant characteristic data, by group; strategy/approach for consideration of potential confounding; strength of associations between exposure and potential confounders and between potential confounders and outcome; and degree of exposure to the confounder in the population.                                             |
| Analysis              | Extent (and if applicable, treatment) of missing data for exposure, outcome, and confounders; approach to modeling; classification of exposure and outcome variables (continuous vs. categorical); testing of assumptions; sample size for specific analyses; and relevant sensitivity analyses.                                                                                                                 |
| Sensitivity           | What are the ages of participants (e.g., not too young in studies of pubertal development)? What is the length of follow-up (for outcomes with long latency periods)? Choice of referent group, the exposure range, and the level of exposure contrast between groups (i.e., the extent to which the “unexposed group” is truly unexposed, and the prevalence of exposure in the group designated as “exposed”). |
| Selective reporting   | Are results presented with adequate detail for all the endpoints and exposure measures reported in the methods section, and are they relevant to the PECO? Are results presented for the full sample as well as for specified subgroups? Were stratified analyses (effect modification) motivated by a specific hypothesis?                                                                                      |

**Table S7. Questions to guide the development of criteria for each domain in experimental animal toxicology studies**

| Evaluation type   | Domain name – core question                                                                                                                                             | Prompting questions                                                                                                                                                                                                                                                                                                                                                                                                                                                                                                                                                                                                                                                                                                                                                                                                                                                                                                         | Basic considerations                                                                                                                                                                                                                                                                                                                                                                                                                                                                                                                                                                                                                                                                                                                                                                                                                                                                                                                                                                                                                                                                                                                                                                                                                                                                                                                                                                                                                              |
|-------------------|-------------------------------------------------------------------------------------------------------------------------------------------------------------------------|-----------------------------------------------------------------------------------------------------------------------------------------------------------------------------------------------------------------------------------------------------------------------------------------------------------------------------------------------------------------------------------------------------------------------------------------------------------------------------------------------------------------------------------------------------------------------------------------------------------------------------------------------------------------------------------------------------------------------------------------------------------------------------------------------------------------------------------------------------------------------------------------------------------------------------|---------------------------------------------------------------------------------------------------------------------------------------------------------------------------------------------------------------------------------------------------------------------------------------------------------------------------------------------------------------------------------------------------------------------------------------------------------------------------------------------------------------------------------------------------------------------------------------------------------------------------------------------------------------------------------------------------------------------------------------------------------------------------------------------------------------------------------------------------------------------------------------------------------------------------------------------------------------------------------------------------------------------------------------------------------------------------------------------------------------------------------------------------------------------------------------------------------------------------------------------------------------------------------------------------------------------------------------------------------------------------------------------------------------------------------------------------|
| Reporting quality | <p><b>Reporting quality</b></p> <p>Does the study report information for evaluating the design and conduct of the study for the endpoint(s)/outcome(s) of interest?</p> | <p>Does the study report the following?</p> <ul style="list-style-type: none"> <li>• <b>Critical information</b> necessary to perform study evaluation: <ul style="list-style-type: none"> <li>○ Species, test article name, levels and duration of exposure, route (e.g., oral, inhalation), qualitative or quantitative results for at least one endpoint of interest</li> </ul> </li> <li>• <b>Important information</b> for evaluating the study methods: <ul style="list-style-type: none"> <li>○ Test animal: strain, sex, source, and general husbandry procedures</li> <li>○ Exposure methods: source, purity, method of administration</li> <li>○ Experimental design: frequency of exposure, animal age, and life stage during exposure and at endpoint/outcome evaluation</li> <li>○ Endpoint evaluation methods: assays or procedures used to measure the endpoints/outcomes of interest</li> </ul> </li> </ul> | <p>These considerations typically do not need to be refined by assessment teams, although in some instances the <b>important information</b> may be refined depending on the endpoints/outcomes of interest or the chemical under investigation.</p> <p>A judgment and rationale for this domain should be given for the study. Typically, these will not change regardless of the endpoints/outcomes investigated by the study. <b>In the rationale, reviewers should indicate whether the study adhered to GLP, OECD, or other testing guidelines.</b></p> <ul style="list-style-type: none"> <li>• <i>Good:</i> All <b>critical and important information</b> is reported or inferable for the endpoints/outcomes of interest.</li> <li>• <i>Adequate:</i> All <b>critical information</b> is reported but some <b>important information</b> is missing. However, the missing information is not expected to significantly impact the study evaluation.</li> <li>• <i>Deficient:</i> All <b>critical information</b> is reported but <b>important information</b> is missing that is expected to significantly reduce the ability to evaluate the study.</li> <li>• <i>Critically Deficient:</i> Study report is missing any pieces of <b>critical information</b>. Studies that are Critically Deficient for reporting are Uninformative for the overall rating and not considered further for evidence synthesis and integration.</li> </ul> |

| Evaluation type |                                | Domain name -- core question                                                                                               | Prompting questions                                                                                                                                                                                                                                                                                                                                                          | Basic considerations                                                                                                                                                                                                                                                                                                                                                                                                                                                                                                                                                                                                                                                                                                                                                                                                                                                                                                                                                                                                                                                                                                                        |
|-----------------|--------------------------------|----------------------------------------------------------------------------------------------------------------------------|------------------------------------------------------------------------------------------------------------------------------------------------------------------------------------------------------------------------------------------------------------------------------------------------------------------------------------------------------------------------------|---------------------------------------------------------------------------------------------------------------------------------------------------------------------------------------------------------------------------------------------------------------------------------------------------------------------------------------------------------------------------------------------------------------------------------------------------------------------------------------------------------------------------------------------------------------------------------------------------------------------------------------------------------------------------------------------------------------------------------------------------------------------------------------------------------------------------------------------------------------------------------------------------------------------------------------------------------------------------------------------------------------------------------------------------------------------------------------------------------------------------------------------|
| Risk of bias    | Selection and performance bias | <p><b>Allocation</b></p> <p>Were animals assigned to experimental groups using a method that minimizes selection bias?</p> | <p>For each study:</p> <ul style="list-style-type: none"> <li>• Did each animal or litter have an equal chance of being assigned to any experimental group (i.e., random allocation)?</li> <li>• Is the allocation method described?</li> <li>• Aside from randomization, were any steps taken to balance variables across experimental groups during allocation?</li> </ul> | <p>These considerations typically do not need to be refined by assessment teams.</p> <p>A judgment and rationale for this domain should be given for each cohort or experiment in the study.</p> <ul style="list-style-type: none"> <li>• <i>Good</i>: Experimental groups were randomized and any specific randomization procedure was described or inferable (e.g., computer-generated scheme). <i>Note: Normalization is not the same as randomization (see response for Adequate).</i></li> <li>• <i>Adequate</i>: Authors report that groups were randomized but do not describe the specific procedure used (e.g., “animals were randomized”). Alternatively, authors used a nonrandom method to control for important modifying factors across experimental groups (e.g., body-weight normalization).</li> <li>• <i>Not Reported</i> (interpreted as Deficient): No indication of randomization of groups or other methods (e.g., normalization) to control for important modifying factors across experimental groups.</li> <li>• <i>Critically Deficient</i>: Bias in the animal allocations was reported or inferable.</li> </ul> |

| Evaluation type | Domain name -- core question   | Prompting questions                                                                                                                                                                                                                                                                                                                                                                                                                                                   | Basic considerations                                                                                                                                                                                                                                                                                                                                                                                                                                                                                                                                                                                                                                                                                                                                                                                                                                                                                                                                                                                                                                                                                                                                                                                                                                                                                                                                                                                                                                                                                                                                  |
|-----------------|--------------------------------|-----------------------------------------------------------------------------------------------------------------------------------------------------------------------------------------------------------------------------------------------------------------------------------------------------------------------------------------------------------------------------------------------------------------------------------------------------------------------|-------------------------------------------------------------------------------------------------------------------------------------------------------------------------------------------------------------------------------------------------------------------------------------------------------------------------------------------------------------------------------------------------------------------------------------------------------------------------------------------------------------------------------------------------------------------------------------------------------------------------------------------------------------------------------------------------------------------------------------------------------------------------------------------------------------------------------------------------------------------------------------------------------------------------------------------------------------------------------------------------------------------------------------------------------------------------------------------------------------------------------------------------------------------------------------------------------------------------------------------------------------------------------------------------------------------------------------------------------------------------------------------------------------------------------------------------------------------------------------------------------------------------------------------------------|
| Risk of bias    | Selection and performance bias | <p>For each endpoint/outcome or grouping of endpoints/outcomes in a study:</p> <ul style="list-style-type: none"> <li>• Does the study report blinding or other methods/procedures for reducing observational bias?</li> <li>• If not, did the study use a design or approach for which such procedures can be inferred?</li> <li>• What is the expected impact of failure to implement (or report implementation) of these methods/procedures on results?</li> </ul> | <p>These considerations typically do not need to be refined by the assessment teams.</p> <p><i>Note: It can be useful for teams to identify highly subjective measures of endpoints/outcomes where observational bias may strongly influence results prior to performing evaluations.</i></p> <p>A judgment and rationale for this domain should be given for each endpoint/outcome or group of endpoints/outcomes investigated in the study.</p> <ul style="list-style-type: none"> <li>• <i>Good:</i> Measures to reduce observational bias were described (e.g., blinding to conceal treatment groups during endpoint evaluation; consensus-based evaluations of histopathology lesions).<sup>a</sup></li> <li>• <i>Adequate:</i> Methods for reducing observational bias (e.g., blinding) can be inferred or were reported but described incompletely.</li> <li>• <i>Not Reported:</i> Measures to reduce observational bias were not described. <ul style="list-style-type: none"> <li>○ Interpreted as Adequate: The potential concern for bias was mitigated based on the use of automated/computer-driven systems; standard laboratory kits; relatively simple, objective measures (e.g., body or tissue weight); or screening-level evaluations of histopathology.</li> <li>○ Interpreted as Deficient: The potential impact on the results is major (e.g., outcome measures are highly subjective).</li> </ul> </li> <li>• <i>Critically Deficient:</i> Strong evidence for observational bias that could have impacted results.</li> </ul> |

| Evaluation type |                              | Domain name -- core question                                                                                                                              | Prompting questions                                                                                                                                                                                                                                                                                                                           | Basic considerations                                                                                                                                                                                                                                                                                                                                                                                                                                                                                                                                                                                                                                                                                                                                                                                                                                                                                                                                                                                                                                                                                                                                                                     |
|-----------------|------------------------------|-----------------------------------------------------------------------------------------------------------------------------------------------------------|-----------------------------------------------------------------------------------------------------------------------------------------------------------------------------------------------------------------------------------------------------------------------------------------------------------------------------------------------|------------------------------------------------------------------------------------------------------------------------------------------------------------------------------------------------------------------------------------------------------------------------------------------------------------------------------------------------------------------------------------------------------------------------------------------------------------------------------------------------------------------------------------------------------------------------------------------------------------------------------------------------------------------------------------------------------------------------------------------------------------------------------------------------------------------------------------------------------------------------------------------------------------------------------------------------------------------------------------------------------------------------------------------------------------------------------------------------------------------------------------------------------------------------------------------|
| Risk of bias    | Confounding/variable control | <p><b>Confounding</b></p> <p>Are variables with the potential to confound or modify results controlled and consistent across all experimental groups?</p> | <p>For each study:</p> <ul style="list-style-type: none"> <li>• Are there differences across the treatment groups (e.g., co-exposures, vehicle, diet, palatability, husbandry, health status, etc.) that could bias the results?</li> <li>• If differences are identified, to what extent are they expected to impact the results?</li> </ul> | <p>These considerations may need to be refined by assessment teams, as the specific variables of concern can vary by experiment or chemical.</p> <p>A judgment and rationale for this domain should be given for each cohort or experiment in the study, noting when the potential for confounding is restricted to specific endpoints/outcomes.</p> <ul style="list-style-type: none"> <li>• <i>Good</i>: Outside of the exposure of interest, variables that are likely to confound or modify results appear to be controlled and consistent across experimental groups.</li> <li>• <i>Adequate</i>: Some concern that variables that were likely to confound or modify results were uncontrolled or inconsistent across groups, but are expected to have a minimal impact on the results.</li> <li>• <i>Deficient</i>: Notable concern that potentially confounding variables were uncontrolled or inconsistent across groups, and are expected to substantially impact the results.</li> <li>• <i>Critically Deficient</i>: Confounding variables were presumed to be uncontrolled or inconsistent across groups, and are expected to be a primary driver of the results.</li> </ul> |

| Evaluation type | Domain name -- core question                                                                                                          | Prompting questions                                                                                                                                                                                                                                                                                                                                                                                                                                                                                                                                                                                                              | Basic considerations                                                                                                                                                                                                                                                                                                                                                                                                                                                                                                                                                                                                                                                                                                                                                                                                                                                                                                                                                                                                                                                                                                                                                                                                                                                                                                                                                                                                                                                                                                 |
|-----------------|---------------------------------------------------------------------------------------------------------------------------------------|----------------------------------------------------------------------------------------------------------------------------------------------------------------------------------------------------------------------------------------------------------------------------------------------------------------------------------------------------------------------------------------------------------------------------------------------------------------------------------------------------------------------------------------------------------------------------------------------------------------------------------|----------------------------------------------------------------------------------------------------------------------------------------------------------------------------------------------------------------------------------------------------------------------------------------------------------------------------------------------------------------------------------------------------------------------------------------------------------------------------------------------------------------------------------------------------------------------------------------------------------------------------------------------------------------------------------------------------------------------------------------------------------------------------------------------------------------------------------------------------------------------------------------------------------------------------------------------------------------------------------------------------------------------------------------------------------------------------------------------------------------------------------------------------------------------------------------------------------------------------------------------------------------------------------------------------------------------------------------------------------------------------------------------------------------------------------------------------------------------------------------------------------------------|
| Risk of bias    | <p><b>Selective reporting and attrition</b></p> <p>Did the study report results for all prespecified outcomes and tested animals?</p> | <p>For each study:</p> <p><i>Selective reporting bias:</i></p> <ul style="list-style-type: none"> <li>• Are all results presented for endpoints/outcomes described in the methods (see note under core question)?</li> </ul> <p><i>Attrition bias:</i></p> <ul style="list-style-type: none"> <li>• Are all animals accounted for in the results?</li> <li>• If there are discrepancies, do authors provide an explanation (e.g., death or unscheduled sacrifice during the study)?</li> <li>• If omitted results and/or attrition are unexplained, what is the expected impact on the interpretation of the results?</li> </ul> | <p>These considerations typically do not need to be refined by assessment teams.</p> <p>A judgment and rationale for this domain should be given for each cohort or experiment in the study.</p> <ul style="list-style-type: none"> <li>• <i>Good:</i> Quantitative or qualitative results were reported for all prespecified outcomes (explicitly stated or inferred), exposure groups and evaluation timepoints. Data not reported in the primary article is available from supplemental material. If results omissions or animal attrition are identified, the authors provide an explanation and these are not expected to impact the interpretation of the results.</li> <li>• <i>Adequate:</i> Quantitative or qualitative results are reported for most prespecified outcomes (explicitly stated or inferred), exposure groups and evaluation time points. Omissions and/or attrition are not explained, but are not expected to significantly impact the interpretation of the results.</li> <li>• <i>Deficient:</i> Quantitative or qualitative results are missing for many prespecified outcomes (explicitly stated or inferred), exposure groups and evaluation time points and/or high animal attrition; omissions and/or attrition are not explained and may significantly impact the interpretation of the results.</li> <li>• <i>Critically Deficient:</i> Extensive results omission and/or animal attrition are identified and prevents comparisons of results across treatment groups.</li> </ul> |
|                 |                                                                                                                                       |                                                                                                                                                                                                                                                                                                                                                                                                                                                                                                                                                                                                                                  |                                                                                                                                                                                                                                                                                                                                                                                                                                                                                                                                                                                                                                                                                                                                                                                                                                                                                                                                                                                                                                                                                                                                                                                                                                                                                                                                                                                                                                                                                                                      |

|             |                              |                                                                                                                                                                                       |                                                                                                                                                                                                                                                                                                                                                                                                                                                                                                                                                                                                                                                                                                                                                                                                                                                                                                                                                                                                                                                                                                                                                                   |                                                                                                                                                                                                                                                                                                                                                                                                                                                                                                                                                                                                                                                                                                                                                                                                                                                                                                                                                                                                                                                                                                                                                                                                                                                                                                                                                                                                                                                                                                                                                                                                                                                                                                                                                                                                                                                                                                                                                                                                |
|-------------|------------------------------|---------------------------------------------------------------------------------------------------------------------------------------------------------------------------------------|-------------------------------------------------------------------------------------------------------------------------------------------------------------------------------------------------------------------------------------------------------------------------------------------------------------------------------------------------------------------------------------------------------------------------------------------------------------------------------------------------------------------------------------------------------------------------------------------------------------------------------------------------------------------------------------------------------------------------------------------------------------------------------------------------------------------------------------------------------------------------------------------------------------------------------------------------------------------------------------------------------------------------------------------------------------------------------------------------------------------------------------------------------------------|------------------------------------------------------------------------------------------------------------------------------------------------------------------------------------------------------------------------------------------------------------------------------------------------------------------------------------------------------------------------------------------------------------------------------------------------------------------------------------------------------------------------------------------------------------------------------------------------------------------------------------------------------------------------------------------------------------------------------------------------------------------------------------------------------------------------------------------------------------------------------------------------------------------------------------------------------------------------------------------------------------------------------------------------------------------------------------------------------------------------------------------------------------------------------------------------------------------------------------------------------------------------------------------------------------------------------------------------------------------------------------------------------------------------------------------------------------------------------------------------------------------------------------------------------------------------------------------------------------------------------------------------------------------------------------------------------------------------------------------------------------------------------------------------------------------------------------------------------------------------------------------------------------------------------------------------------------------------------------------------|
| Sensitivity | Exposure methods sensitivity | <p><b>Chemical administration and characterization</b></p> <p>Did the study adequately characterize exposure to the chemical of interest and the exposure administration methods?</p> | <p>For each study:</p> <ul style="list-style-type: none"> <li>• Does the study report the source and purity and/or composition (e.g., identity and percent distribution of different isomers) of the chemical? If not, can the purity and/or composition be obtained from the supplier (e.g., as reported on the website)?</li> <li>• Was independent analytical verification of the test article purity and composition performed?</li> <li>• Did the authors take steps to ensure the reported exposure levels were accurate? <ul style="list-style-type: none"> <li>○ For inhalation studies: Were target concentrations confirmed using reliable analytical measurements in chamber air?</li> <li>○ For oral studies: If necessary based on consideration of chemical-specific knowledge (e.g., instability in solution; volatility) and/or exposure design (e.g., the frequency and duration of exposure), were chemical concentrations in the dosing solutions or diet analytically confirmed?</li> </ul> </li> <li>• Are there concerns about the methods used to administer the chemical (e.g., inhalation chamber type, gavage volume, etc.)?</li> </ul> | <p>It is essential that these criteria are considered, and potentially refined, by assessment teams, as the specific variables of concern can vary by chemical.</p> <p>A judgment and rationale for this domain should be given for each cohort or experiment in the study.</p> <ul style="list-style-type: none"> <li>• <i>Good</i>: Chemical administration and characterization is complete (i.e., source, purity, and analytical verification of the test article are provided). There are no concerns about the composition, stability, or purity of the administered chemical or the specific methods of administration. For inhalation studies, chemical concentrations in the exposure chambers are verified using reliable analytical methods.</li> <li>• <i>Adequate</i>: Some uncertainties in the chemical administration and characterization are identified but these are expected to have minimal impact on interpretation of the results (e.g., source and vendor-reported purity are presented, but not independently verified; purity of the test article is suboptimal but not concerning; for inhalation studies, actual exposure concentrations are missing or verified with less reliable methods).</li> <li>• <i>Deficient</i>: Uncertainties in the exposure characterization are identified and expected to substantially impact the results (e.g., source of the test article is not reported; levels of impurities are substantial or concerning; deficient administration methods, such as the use of static inhalation chambers or a gavage volume considered too large for the species and/or life stage at exposure).</li> <li>• <i>Critically Deficient</i>: Uncertainties in the exposure characterization are identified and there is reasonable certainty that the results are largely attributable to factors other than exposure to the chemical of interest (e.g., identified impurities are expected to be a primary driver of the results).</li> </ul> |
|             |                              |                                                                                                                                                                                       |                                                                                                                                                                                                                                                                                                                                                                                                                                                                                                                                                                                                                                                                                                                                                                                                                                                                                                                                                                                                                                                                                                                                                                   |                                                                                                                                                                                                                                                                                                                                                                                                                                                                                                                                                                                                                                                                                                                                                                                                                                                                                                                                                                                                                                                                                                                                                                                                                                                                                                                                                                                                                                                                                                                                                                                                                                                                                                                                                                                                                                                                                                                                                                                                |

| Evaluation type |                              | Domain name -- core question                                                                                                                                           | Prompting questions                                                                                                                                                                                                                                                                                             | Basic considerations                                                                                                                                                                                                                                                                                                                                                                                                                                                                                                                                                                                                                                                                                                                                                                                                                                                                                                                                                                                                                                                                                                               |
|-----------------|------------------------------|------------------------------------------------------------------------------------------------------------------------------------------------------------------------|-----------------------------------------------------------------------------------------------------------------------------------------------------------------------------------------------------------------------------------------------------------------------------------------------------------------|------------------------------------------------------------------------------------------------------------------------------------------------------------------------------------------------------------------------------------------------------------------------------------------------------------------------------------------------------------------------------------------------------------------------------------------------------------------------------------------------------------------------------------------------------------------------------------------------------------------------------------------------------------------------------------------------------------------------------------------------------------------------------------------------------------------------------------------------------------------------------------------------------------------------------------------------------------------------------------------------------------------------------------------------------------------------------------------------------------------------------------|
| Sensitivity     | Exposure methods sensitivity | <p><b>Exposure timing, frequency and duration</b></p> <p>Was the timing, frequency, and duration of exposure sensitive for the endpoint(s)/outcome(s) of interest?</p> | <p>For each endpoint/outcome or grouping of endpoints/outcomes in a study:</p> <ul style="list-style-type: none"> <li>• Does the exposure period include the critical window of sensitivity?</li> <li>• Was the duration and frequency of exposure sensitive for detecting the endpoint of interest?</li> </ul> | <p>Considerations for this domain are highly variable depending on the endpoint(s)/outcome(s) of interest and must be refined by assessment teams.</p> <p>A judgment and rationale for this domain should be given for each endpoint/outcome or group of endpoints/outcomes investigated in the study.</p> <ul style="list-style-type: none"> <li>• <i>Good</i>: The duration and frequency of the exposure was sensitive and the exposure included the critical window of sensitivity (if known).</li> <li>• <i>Adequate</i>: The duration and frequency of the exposure was sensitive and the exposure covered most of the critical window of sensitivity (if known).</li> <li>• <i>Deficient</i>: The duration and/or frequency of the exposure is not sensitive and did not include most of the critical window of sensitivity (if known). These limitations are expected to bias the results towards the null.</li> <li>• <i>Critically Deficient</i>: The exposure design was not sensitive and is expected to strongly bias the results towards the null. The rationale should indicate the specific concern(s).</li> </ul> |



| Evaluation type |                                      | Domain name -- core question                                                                                                                                                                                                                                              | Prompting questions                                                                                                                                                                                                                                                                                                                                                       | Basic considerations                                                                                                                                                                                                                                                                                                                                                                                                                                                                                                                                                                                                                                                                                                                                                                                                                                                                                                                                                                                                         |
|-----------------|--------------------------------------|---------------------------------------------------------------------------------------------------------------------------------------------------------------------------------------------------------------------------------------------------------------------------|---------------------------------------------------------------------------------------------------------------------------------------------------------------------------------------------------------------------------------------------------------------------------------------------------------------------------------------------------------------------------|------------------------------------------------------------------------------------------------------------------------------------------------------------------------------------------------------------------------------------------------------------------------------------------------------------------------------------------------------------------------------------------------------------------------------------------------------------------------------------------------------------------------------------------------------------------------------------------------------------------------------------------------------------------------------------------------------------------------------------------------------------------------------------------------------------------------------------------------------------------------------------------------------------------------------------------------------------------------------------------------------------------------------|
| Sensitivity     | Outcome measures and results display | <p><b>Endpoint sensitivity and specificity</b></p> <p>Are the procedures sensitive and specific for evaluating the endpoint(s)/outcome(s) of interest?</p> <p><i>Note: Sample size alone is not a reason to conclude an individual study is critically deficient.</i></p> | <p>For each endpoint/outcome or grouping of endpoints/outcomes in a study:</p> <ul style="list-style-type: none"> <li>• Are there concerns regarding the specificity and validity of the protocols?</li> <li>• Are there serious concerns regarding the sample size (see note)?</li> <li>• Are there concerns regarding the timing of the endpoint assessment?</li> </ul> | <p>Considerations for this domain are highly variable depending on the endpoint(s)/outcome(s) of interest and must be refined by assessment teams.</p> <p>A judgment and rationale for this domain should be given for each endpoint/outcome or group of endpoints/outcomes investigated in the study.</p> <p>Examples of potential concerns include:</p> <ul style="list-style-type: none"> <li>• Selection of protocols that are insensitive or nonspecific for the endpoint of interest</li> <li>• Use of unreliable methods to assess the outcome</li> <li>• Assessment of endpoints at inappropriate or insensitive ages, or without addressing known endpoint variation (e.g., due to circadian rhythms, estrous cyclicity, etc.).</li> <li>• Decreased specificity or sensitivity of the response due to the timing of endpoint evaluation, as compared to exposure (e.g., short-acting depressant or irritant effects of chemicals; insensitivity due to prolonged period of nonexposure before testing).</li> </ul> |

| Evaluation type |                                      | Domain name -- core question                                                                                             | Prompting questions                                                                                                                                                                                                                                                                                                     | Basic considerations                                                                                                                                                                                                                                                                                                                                                                                                                                                                                                                                                                                                                                                                                                                                                                                                                                                                                                                                                                             |
|-----------------|--------------------------------------|--------------------------------------------------------------------------------------------------------------------------|-------------------------------------------------------------------------------------------------------------------------------------------------------------------------------------------------------------------------------------------------------------------------------------------------------------------------|--------------------------------------------------------------------------------------------------------------------------------------------------------------------------------------------------------------------------------------------------------------------------------------------------------------------------------------------------------------------------------------------------------------------------------------------------------------------------------------------------------------------------------------------------------------------------------------------------------------------------------------------------------------------------------------------------------------------------------------------------------------------------------------------------------------------------------------------------------------------------------------------------------------------------------------------------------------------------------------------------|
| Sensitivity     | Outcome measures and results display | <p><b>Results presentation</b></p> <p>Are the results presented in a way that makes the data usable and transparent?</p> | <p>For each endpoint/outcome or grouping of endpoints/outcomes in a study:</p> <ul style="list-style-type: none"> <li>• Does the level of detail allow for an informed interpretation of the results?</li> <li>• Are the data analyzed, compared, or presented in a way that is inappropriate or misleading?</li> </ul> | <p>Considerations for this domain are highly variable depending on the outcomes of interest and must be refined by assessment teams.</p> <p>A judgment and rationale for this domain should be given for each endpoint/outcome or group of endpoints/outcomes investigated in the study.</p> <p>Examples of potential concerns include:</p> <ul style="list-style-type: none"> <li>• Nonpreferred presentation, such as developmental toxicity data averaged across pups in a treatment group, when litter responses are more appropriate</li> <li>• Failing to present quantitative results</li> <li>• Pooling data when responses are known or expected to differ substantially (e.g., across sexes or ages)</li> <li>• Failing to report on or address overt toxicity when exposure levels are known or expected to be highly toxic</li> <li>• Lack of full presentation of the data (e.g., presentation of mean without variance data; concurrent control data are not presented)</li> </ul> |

| Evaluation type           | Domain name -- core question                                                                                                                                                    | Prompting questions                                                                                                                                                                                                                                                                                                                                                                                                                                                                                               | Basic considerations                                                                                                                                                                                                                                                                                                                                                                                                                                                                                                                                                                                                                                                                                                                                                                                                                                                                                                                                                                                                                                                                                                                                                                                                                                                                                                                                                                                                                                                                                                        |
|---------------------------|---------------------------------------------------------------------------------------------------------------------------------------------------------------------------------|-------------------------------------------------------------------------------------------------------------------------------------------------------------------------------------------------------------------------------------------------------------------------------------------------------------------------------------------------------------------------------------------------------------------------------------------------------------------------------------------------------------------|-----------------------------------------------------------------------------------------------------------------------------------------------------------------------------------------------------------------------------------------------------------------------------------------------------------------------------------------------------------------------------------------------------------------------------------------------------------------------------------------------------------------------------------------------------------------------------------------------------------------------------------------------------------------------------------------------------------------------------------------------------------------------------------------------------------------------------------------------------------------------------------------------------------------------------------------------------------------------------------------------------------------------------------------------------------------------------------------------------------------------------------------------------------------------------------------------------------------------------------------------------------------------------------------------------------------------------------------------------------------------------------------------------------------------------------------------------------------------------------------------------------------------------|
| <b>Overall confidence</b> | <p><b>Overall confidence</b></p> <p>Considering the identified strengths and limitations, what is the overall confidence rating for the endpoint(s)/outcome(s) of interest?</p> | <p>For each endpoint/outcome or grouping of endpoints/outcomes in a study:</p> <ul style="list-style-type: none"> <li>• Were concerns (i.e., limitations or uncertainties) related to the reporting quality, risk of bias, or sensitivity identified?</li> <li>• If yes, what is their expected impact on the overall interpretation of the reliability and validity of the study results, including (when possible) interpretations of impacts on the magnitude or direction of the reported effects?</li> </ul> | <p>The overall confidence rating considers the likely impact of the noted concerns (i.e., limitations or uncertainties) in reporting, bias, and sensitivity on the results.</p> <p>A confidence rating and rationale should be given for each endpoint/outcome or group of endpoints/outcomes investigated in the study.</p> <ul style="list-style-type: none"> <li>• <i>High Confidence</i>: No notable concerns are identified (e.g. most or all domains rated Good).</li> <li>• <i>Medium Confidence</i>: Some concerns are identified, but expected to have minimal impact on the interpretation of the results (e.g., most domains rated Adequate or Good; may include studies with Deficient ratings if concerns are not expected to strongly impact the magnitude or direction of the results). Any important concerns should be carried forward to evidence synthesis.</li> <li>• <i>Low Confidence</i>: Identified concerns are expected to significantly impact on the study results or their interpretation (e.g., generally, Deficient ratings for one or more domains). The concerns leading to this confidence judgment must be carried forward to evidence synthesis (see note).</li> <li>• <i>Uninformative</i>: Serious flaw(s) that make the study results unusable for informing hazard identification (e.g., generally, a Critically Deficient rating in any domain; many Deficient ratings). Uninformative studies are not considered further in the synthesis and integration of evidence.</li> </ul> |

## 4. Epidemiology studies reporting on other health systems

**Table S8. Summary of eight human studies that did not report any of the health systems selected for further evaluation. These studies did not undergo study evaluation.**

| Author/year                   | Study description                                                             | Route of exposure              | Exposure measurement                                                                 | Outcome(s) evaluated                                                      | Outcomes(s) observed                                                                                                                                                                                                                       | Applicability of exposure data for dose-response                                                                                   |
|-------------------------------|-------------------------------------------------------------------------------|--------------------------------|--------------------------------------------------------------------------------------|---------------------------------------------------------------------------|--------------------------------------------------------------------------------------------------------------------------------------------------------------------------------------------------------------------------------------------|------------------------------------------------------------------------------------------------------------------------------------|
| <b>Neurological</b>           |                                                                               |                                |                                                                                      |                                                                           |                                                                                                                                                                                                                                            |                                                                                                                                    |
| <b>Heaton et al. (2017)</b>   | Occupational cohort study of 74 military Air Force personnel in United States | Inhalation                     | Breathing zone air samples and urinary biomarkers of naphthalene exposure (1N or 2N) | Neurocognitive performance measured using a standardized battery of tests | No significant associations with neurocognitive performance for both those individuals having regular contact vs. minimal/no direct contact and between repeated measures of absorbed dose and reduced proficiency on neurocognitive tasks | <b>Limited suitability.</b> Average 4-day breathing zone exposure levels are used as surrogate indicators of high or low exposure. |
| <b>Hepatic</b>                |                                                                               |                                |                                                                                      |                                                                           |                                                                                                                                                                                                                                            |                                                                                                                                    |
| <b>Sodeinde et al. (1995)</b> | General population case-control study of 194 jaundiced neonates and 80 of     | Non-specific route of exposure | Serum biomarkers of naphthalene exposure (1N or 2N)                                  | Clinically diagnosed jaundice                                             | No significant difference in the frequency of detection of serum                                                                                                                                                                           | <b>Not suitable.</b> Exposure levels in control and jaundice                                                                       |

|                                   |                                                                                                                              |                                |                                                      |                                                                                                                                                                              |                                                                 |                                                                                                                                                                                                                                                                                       |
|-----------------------------------|------------------------------------------------------------------------------------------------------------------------------|--------------------------------|------------------------------------------------------|------------------------------------------------------------------------------------------------------------------------------------------------------------------------------|-----------------------------------------------------------------|---------------------------------------------------------------------------------------------------------------------------------------------------------------------------------------------------------------------------------------------------------------------------------------|
|                                   | their mothers (case) and 48 non-jaundiced neonates and 7 of their mothers (control) in Nigeria                               |                                |                                                      |                                                                                                                                                                              | naphthols between jaundiced and non-jaundiced groups            | groups are reported only as ranges.                                                                                                                                                                                                                                                   |
| <b>Familusi and Dawodu (1985)</b> | General population cross-sectional health survey of 450 mothers and babies (excluding premature infants) in Nigeria          | Non-specific route of exposure | Self-reported use of naphthalene-containing products | Self-reported history of neonatal jaundice. The severity of jaundice was defined as "mild" if blood transfusion was not needed and "severe" if blood transfusion was needed. | Severe jaundice associated with history of naphthalene exposure | <b>Not suitable.</b> No exposure level data. Cross-sectional study design with limited ability to assess temporality.                                                                                                                                                                 |
| <b>Endocrine/Exocrine</b>         |                                                                                                                              |                                |                                                      |                                                                                                                                                                              |                                                                 |                                                                                                                                                                                                                                                                                       |
| <b>Meeker et al. (2006)</b>       | General population cross-sectional health survey of 322 adult men (mean age 36.1 years) from year 2000-2003 in United States | Non-specific route of exposure | Urinary biomarker of naphthalene exposure (1N)       | Serum thyroid hormone levels: free thyroxine, total triiodothyronine, and thyroid stimulating hormone                                                                        | No significant associations with serum thyroid hormone levels   | <b>Limited suitability.</b> Cross-sectional study design with limited ability to assess temporality. Significant concern for exposure misclassification due to use of urinary 1N. Also, insufficient availability of data or models to relate urinary metabolites to exposure levels. |
| <b>Zhu et al. (2009)</b>          | General population cross-sectional health survey of 480 men diagnosed with                                                   | Non-specific route of exposure | Urinary biomarkers of naphthalene exposure           | Serum thyroid hormone levels: free and total thyroxine, free triiodothyronine,                                                                                               | No significant associations with serum thyroid hormone levels   | <b>Limited suitability.</b> Cross-sectional study design with limited ability to                                                                                                                                                                                                      |

|                                       |                                                                                                                                                                                                                                                                                                                                                                                                                                 |                                |                                                          |                                                                                   |                                                                                                                                                                                                                                                             |                                                                                                                           |
|---------------------------------------|---------------------------------------------------------------------------------------------------------------------------------------------------------------------------------------------------------------------------------------------------------------------------------------------------------------------------------------------------------------------------------------------------------------------------------|--------------------------------|----------------------------------------------------------|-----------------------------------------------------------------------------------|-------------------------------------------------------------------------------------------------------------------------------------------------------------------------------------------------------------------------------------------------------------|---------------------------------------------------------------------------------------------------------------------------|
|                                       | unexplained male factor infertility between 2004 and 2007 (200 controls) in China                                                                                                                                                                                                                                                                                                                                               |                                | (1N or 2N)                                               | and thyroid stimulating hormone                                                   |                                                                                                                                                                                                                                                             | assess temporality. Insufficient availability of data or models to relate urinary metabolites to exposure levels          |
| <b>Cardiometabolic</b>                |                                                                                                                                                                                                                                                                                                                                                                                                                                 |                                |                                                          |                                                                                   |                                                                                                                                                                                                                                                             |                                                                                                                           |
| <b>Bushnik et al. (2020)</b>          | Cross-sectional analysis of data from 3667 children aged 3–18 years (excluding 551 due to missing values for at least one metabolites, 21 due to missing values for one of the outcomes, and 206 due to missing values for at least one of the covariates) who participated in the Canadian Health Measures Survey (CHMS, 2009–2015, from the second (2009–2011), third (2012–2013), and fourth (2014–2015) cycles of the CHMS) | Non-specific route of exposure | Urinary naphthalene metabolite levels (sum of 1N and 2N) | BMI (Body mass index), WC (Waist circumference), and WHtR (Waist-to-height ratio) | Statistically significant positive association of BMI, WC, and WHtR with naphthalene metabolites in the total population aged 3–18 and in age groups 6–11 and 12–18; only in age group 3-5 no statistically significant association of BMI with naphthalene | <b>Limited suitability.</b> Insufficient availability of data or models to relate urinary metabolites to exposure levels. |
| <b>Scinicariello and Buser (2014)</b> | Cross-sectional analysis of 3189 individuals 6- 19 yrs                                                                                                                                                                                                                                                                                                                                                                          | Non-specific                   | Urinary biomarkers of                                    | Body mass index (BMI) z-score, waist                                              | Positive association between 2-naphthol or total naphthalene                                                                                                                                                                                                | <b>Limited suitability.</b> Cross-sectional study design with                                                             |

|                              |                                                                                                                |                                |                                                       |                                                                                                                                                                                                                                |                                                                                                                                                                                                                                                             |                                                                                                                                                                                                   |
|------------------------------|----------------------------------------------------------------------------------------------------------------|--------------------------------|-------------------------------------------------------|--------------------------------------------------------------------------------------------------------------------------------------------------------------------------------------------------------------------------------|-------------------------------------------------------------------------------------------------------------------------------------------------------------------------------------------------------------------------------------------------------------|---------------------------------------------------------------------------------------------------------------------------------------------------------------------------------------------------|
|                              | old from 2001-2006 NHANES in United States                                                                     | route of exposure              | naphthalene exposure (1N or 2N)                       | circumference, rate of obesity                                                                                                                                                                                                 | metabolites and BMI, waist circumference, and obesity                                                                                                                                                                                                       | limited ability to assess temporality. Insufficient availability of data or models to relate urinary metabolites to exposure levels                                                               |
| <b>Ranjbar et al. (2015)</b> | Cross-sectional analysis of 4765 adult participants ≥ 20 years old from 2001-2008 NHANES in United States      | Non-specific route of exposure | Urinary biomarkers of naphthalene exposure (1N or 2N) | Obesity, hypertension, dyslipidemia, type 2 diabetes, metabolic syndrome (defined as having at least 3 risk factors including high cholesterol levels, high triglyceride levels, hypertension, or blood glucose abnormalities) | Significant positive association with hypertension (2-naphthol), obesity (2-naphthol), metabolic syndrome (2-naphthol), dyslipidemia (1- and 2-naphthol), type 2 diabetes (1- and 2-naphthol). Significant negative association of 1-naphthol with obesity. | <b>Limited suitability.</b> Cross-sectional study design with limited ability to assess temporality. Insufficient availability of data or models to relate urinary metabolites to exposure levels |
| <b>Clark et al. (2012)</b>   | Cross-sectional analysis of 3,219 people ≥ 20 years of age, from the NHANES 2001-2004 dataset in United States | Non-specific route of exposure | Urinary biomarkers of naphthalene exposure (1N or 2N) | Serum biomarkers of cardiovascular disease (homocysteine, fibrinogen, white blood cell counts)                                                                                                                                 | No significant association with serum biomarkers of cardiovascular disease                                                                                                                                                                                  | <b>Limited suitability.</b> Cross-sectional study design with limited ability to assess temporality. Insufficient availability of data or models to relate urinary metabolites to exposure levels |

## 5. References

- Abdo, KM; Grumbein, S; Chou, BJ; Herbert, R. (2001). Toxicity and carcinogenicity study in F344 rats following 2 years of whole-body exposure to naphthalene vapors. *Inhal Toxicol* 13: 931-950. <http://dx.doi.org/10.1080/089583701752378179>
- ACGIH (American Conference of Governmental Industrial Hygienists). (1992). Naphthalene. In *Documentation of the threshold limit values and biological exposure indices* (6th ed.). Cincinnati, OH.
- ACGIH (American Conference of Governmental Industrial Hygienists). (2001). Naphthalene. In *Documentation of the threshold limit values and biological exposure indices*. Cincinnati, OH.
- ACGIH (American Conference of Governmental Industrial Hygienists). (2007). 2007 TLVs and BEIs: Based on the documentation of the threshold limit values for chemical substances and physical agents and biological exposure indices. Cincinnati, OH.
- AIHA (American Industrial Hygiene Association). (2016). Current ERPG Values (2016). In *2016 ERPG/WEEL Handbook*. Fairfax, VA: American Industrial Hygiene Association Guideline Foundation.
- ATSDR (Agency for Toxic Substances and Disease Registry). (2005). Toxicological profile for naphthalene, 1-methylnaphthalene, and 2-methylnaphthalene. (PB2006100004). Atlanta, GA. <https://ntrl.ntis.gov/NTRL/dashboard/searchResults.xhtml?searchQuery=PB2006100004>
- ATSDR (Agency for Toxic Substances and Disease Registry). (2021a). Minimal risk levels (MRLs). Available online at <https://wwwn.cdc.gov/TSP/MRLS/mrlsListing.aspx> (accessed March 17, 2021).
- ATSDR (Agency for Toxic Substances and Disease Registry). (2021b). Toxic substances portal: Toxicological profiles. Available online at <https://www.atsdr.cdc.gov/toxprofiledocs/index.html> (accessed March 17, 2021).
- Buckpitt, AR; Richieri, P. (1984). Comparative biochemistry and metabolism: Part II: Naphthalene lung toxicity. (AFAMRL-TR-84-058). Wright-Patterson Air Force Base, OH: Air Force Aerospace Medical Research Laboratory.
- Bushnik, T; Wong, SL; Holloway, AC; Thomson, EM. (2020). Association of urinary polycyclic aromatic hydrocarbons and obesity in children aged 3-18: Canadian Health Measures Survey 2009-2015. *Journal of Developmental Origins of Health and Disease* 11: 623-631. <http://dx.doi.org/10.1017/S2040174419000825>
- CalEPA (California Environmental Protection Agency). (2021). OEHHA toxicity criteria database. Available online at <http://www.oehha.ca.gov/tcdb/index.asp> (accessed March 17, 2021).
- Clark, JD, III; Serdar, B; Lee, DJ; Arheart, K; Wilkinson, JD; Fleming, LE. (2012). Exposure to polycyclic aromatic hydrocarbons and serum inflammatory markers of cardiovascular disease. *Environ Res* 117: 132-137. <http://dx.doi.org/10.1016/j.envres.2012.04.012>
- Cock, TC. (1957). Acute hemolytic anemia in the neonatal period. *AMA J Dis Child* 94: 77-79. <http://dx.doi.org/10.1001/archpedi.1957.04030020079013>
- Coombs, D. (1993). Naphthalene 4-Week Inhalation Study in Rats: Lab Project Number: LDA 1/921559. Unpublished study prepared by Huntingdon Research Centre Ltd. 165 p. (MRID 42934901[ZK3]). Coombs, D.
- CT DEEP (Connecticut Department of Energy and Environmental Protection). (2018). Technical support document: Recommended numeric criteria for common additional polluting substances and certain alternative criteria. Hartford, CT. [https://portal.ct.gov/-/media/DEEP/site\\_clean\\_up/remediation\\_regulations/TechnicalSupportDocumentAPSAltCriteria.pdf](https://portal.ct.gov/-/media/DEEP/site_clean_up/remediation_regulations/TechnicalSupportDocumentAPSAltCriteria.pdf)



- Dawson, JP; Thayer, WW; Desforges, JF. (1958). Acute hemolytic anemia in the newborn infant due to naphthalene poisoning: report of two cases, with investigations into the mechanism of the disease. *Blood* 13: 1113-1125.
- DFG (Deutsche Forschungsgemeinschaft). (2020). List of MAK and BAT values 2020: Permanent senate commission for the investigation of health hazards of chemical compounds in the work area. Available online at [http://dx.doi.org/10.34865/mbwl\\_2020\\_eng](http://dx.doi.org/10.34865/mbwl_2020_eng) (accessed March 17, 2021).
- DOE (U.S. Department of Energy). (2009). Table 3: Protective Action Criteria (PAC) Rev 25 based on applicable 60-minute AEGLs, ERPGs, or TEELs. The chemicals are listed by CASRN. August 2009. [https://sp.eota.energy.gov/pac/Docs/Revision\\_25\\_Table3.pdf](https://sp.eota.energy.gov/pac/Docs/Revision_25_Table3.pdf)
- DOE (U.S. Department of Energy). (2018). Table 2: Protective Action Criteria (PAC) Rev. 29a based on applicable 60-minute AEGLs, ERPGs, or TEELs. Available online at <https://edms.energy.gov/pac/TeelDocs> (accessed March 17, 2021).
- Dusseldorp, A; van Bruggen, M; Douwes, J; Janssen, P, J.C.M; Kelfkens, G. (2011). Health-based guideline values for the indoor environment. (RIVM report 609021044/2007). Bilthoven, The Netherlands: National Institute for Public Health and the Environment (RIVM). <https://www.rivm.nl/bibliotheek/rapporten/609021044.pdf>
- ECB (European Chemicals Bureau). (2003). European Union Risk Assessment Report: Naphthalene CAS No: 91-20-3 EINECS No: 202-049-5. European Commission. <http://echa.europa.eu/documents/10162/4c955673-9744-4d1c-a812-2bf97863906a>
- Edwards, DA; Andriot, MD; Amoruso, MA; Tummey, AC; Bevan, CJ; Tveit, A; Hayes, LA; Youngren, SH; Nakles, DV. (1997). Total petroleum hydrocarbon criteria working group series: Volume 4: Development of fraction specific reference doses (RFDs) and reference concentrations (RFCs) for total petroleum hydrocarbons (TPH). Amherst, MA: Amherst Scientific Publishers.
- Familusi, JB; Dawodu, AH. (1985). A survey of neonatal jaundice in association with household drugs and chemicals in Nigeria. *Ann Trop Paediatr* 5: 219-222.
- Gerarde, HW. (1960). Toxicology and biochemistry of aromatic hydrocarbons. In *Toxicology and Biochemistry of Aromatic Hydrocarbons*. Amsterdam, The Netherlands: Elsevier.
- Government of Canada. (2021). Publications: Healthy living. Available online at <https://www.canada.ca/en/services/health/publications/healthy-living.html> (accessed March 17, 2021).
- Grigor, WG; Robin, H; Harley, JD. (1966). An Australian variant on "full-moon disease". *Med J Aust* 2: 1229-1230.
- Gustafson, JB; Griffith Tell, J; Orem, D. (1997). Total Petroleum Hydrocarbon Criteria Working Group series: Volume 3: Selection of representative TPH fractions based on fate and transport considerations. Amherst, MA: Amherst Scientific Publishers. [https://netforum.avectra.com/eweb/shopping/shopping.aspx?pager=1&site=aehs&webcode=sopping&prd\\_key=146b7eaf-c92d-4e4b-af1f-092c5735a10b](https://netforum.avectra.com/eweb/shopping/shopping.aspx?pager=1&site=aehs&webcode=sopping&prd_key=146b7eaf-c92d-4e4b-af1f-092c5735a10b)
- Hanssler, H. (1964). Lebensbedrohliche Naphthalinvergiftung bei einem Saugling durch Vaporin-Dampfe [Life-threatening naphthalene poisoning of an infant by vaporin fumes]. *Dtsch Med Wochenschr* 89: 1794-1797.
- Health Canada. (1996). Health-based tolerable daily intakes/Concentrations and tumorigenic doses/Concentrations for priority substances. (96-EHD-194). Ottawa, ON, Canada: Environmental Health Directorate, Health Protection Branch. <http://publications.gc.ca/site/archivee-archived.html?url=http://publications.gc.ca/collections/Collection/H46-2-96-194E.pdf>
- Health Canada. (2013). Residential indoor air quality guideline: Naphthalene. <https://www.canada.ca/en/health-canada/services/publications/healthy-living/residential-indoor-air-quality-guideline-naphthalene.html>
- Health Canada. (2020). Guidelines for Canadian drinking water quality: Summary table. Ottawa, Ontario. <https://www.canada.ca/content/dam/hc-sc/migration/hc-sc/ewh->

- [semt/alt\\_formats/pdf/pubs/water-eau/sum\\_guide-res\\_recom/summary-table-EN-2020-02-11.pdf](#)
- Heaton, KJ; Maule, AL; Smith, KW; Rodrigues, EG; McClean, MD; Proctor, SP. (2017). JP8 exposure and neurocognitive performance among US Air Force personnel. *Neurotoxicology* 62: 170-180. <http://dx.doi.org/10.1016/j.neuro.2017.07.001>
- HSA (Health and Safety Authority). (2020). Chemical agents and carcinogens: Code of practice 2020. Dublin, Ireland. [https://www.hsa.ie/eng/publications\\_and\\_forms/publications/codes\\_of\\_practice/chemical\\_agents\\_code\\_of\\_practice\\_2020.html](https://www.hsa.ie/eng/publications_and_forms/publications/codes_of_practice/chemical_agents_code_of_practice_2020.html)
- HSL (Health and Safety Laboratory). (2002). Draft 2nd Indicative Occupational Exposure Limit Value (IOELV) List: Workplace Measurement Method Summaries. (HSL/2002/23). Bootle, England. [http://www.hse.gov.uk/research/hsl\\_pdf/2002/hsl02-23.pdf](http://www.hse.gov.uk/research/hsl_pdf/2002/hsl02-23.pdf)
- IDEM (Indiana Department of Environmental Management). (2019). Air Toxics Toxicity Information. Available online at <https://www.in.gov/idem/toxic/2343.htm> (accessed March 17, 2021).
- IFA (Institut für Arbeitsschutz der Deutschen Gesetzlichen Unfallversicherung). (2020). GESTIS International Limit Values. Available online at <https://limitvalue.ifa.dguv.de/> (accessed March 17, 2021).
- Irlé, U. (1964). Akute hämolytische Anämie durch Naphthalin-Inhalation bei zwei Frühgeborenen und einem Neugeborenen. *Dtsch Med Wochenschr* 89: 1798-1800. <http://dx.doi.org/10.1055/s-0028-1113200>
- JSOH (Japan Society for Occupational Health). (2017). Recommendation of occupational exposure limits (2010-2011). *J Occup Health* 52: 308-324. <https://www.sanei.or.jp/?mode=view&cid=328>
- MassDEP (Massachusetts Department of Environmental Protection). (2011). Methodology for updating air guidelines: allowable ambient limits (AALS) and threshold effects exposure limits (TELS). <https://www.mass.gov/files/documents/2016/08/tc/aaltel11.pdf>
- MassDEP (Massachusetts Department of Environmental Protection). (2019). MassDep Ambient Air Toxics Guidelines. Available online at <https://www.mass.gov/service-details/massdep-ambient-air-toxics-guidelines> (accessed March 17, 2021).
- MDH (Minnesota Department of Health). (2004). Naphthalene - Guidance for Air: Acute and Chronic Health-Based Values; Inhalation Unit Risk Consultation. <https://www.health.state.mn.us/communities/environment/risk/docs/guidance/air/naphthalene.pdf>
- MDH (Minnesota Department of Health). (2019). Air values table. Available online at <https://www.health.state.mn.us/communities/environment/risk/guidance/air/table.html> (accessed March 17, 2021).
- Meeker, JD; Barr, DB; Hauser, R. (2006). Thyroid hormones in relation to urinary metabolites of non-persistent insecticides in men of reproductive age. *Reprod Toxicol* 22: 437-442. <http://dx.doi.org/10.1016/j.reprotox.2006.02.005>
- Michigan DEQ (Michigan Department of Environmental Quality). (2016). Cleanup criteria and screening levels development and application: Remediation and redevelopment division resource materials (draft). Lansing, MI. [https://www.michigan.gov/documents/deq/deq-rrd-chem-CleanupCriteriaTSD\\_527410\\_7.pdf](https://www.michigan.gov/documents/deq/deq-rrd-chem-CleanupCriteriaTSD_527410_7.pdf)
- Naiman, JL; Kosoy, MH. (1964). Red cell glucose-6-phosphate dehydrogenase deficiency--a newly recognized cause of neonatal jaundice and kernicterus in Canada. *Can Med Assoc J* 91: 1243-1249.
- NC Department of Environmental Quality (North Carolina Department of Environmental Quality). (2014). Toxic air pollutant guidelines. (15A NCAC 02D .1104). <https://files.nc.gov/ncdeq/Air%20Quality/rules/rules/D1104.pdf>
- NDEP (Nevada Division of Environmental Protection). (2017). Basic Comparison Levels. <https://ndep.nv.gov/uploads/documents/july-2017-ndep-bcls.pdf>

NIOSH (National Institute for Occupational Safety and Health). (1994). Immediately dangerous to life or health concentrations (IDLH): Naphthalene. Available online at <https://www.cdc.gov/niosh/idlh/91203.html> (accessed March 17, 2021).

NIOSH (National Institute for Occupational Safety and Health). (2019). NIOSH pocket guide to chemical hazards. Index of chemical abstracts service registry numbers (CAS No.). Available online at <http://www.cdc.gov/niosh/npg/npgdcas.html> (accessed March 17, 2021).

NJ DEP (New Jersey Department of Environmental Protection). (2020). Toxicity values for inhalation exposure. Trenton, NJ. <https://www.state.nj.us/dep/aqpp/downloads/risk/ToxAll2020.pdf>

NTP (National Toxicology Program). (1980). Unpublished subchronic toxicity study: naphthalene (C52904), Fischer 344 rats.

NTP (National Toxicology Program). (1991). Final study report and appendix: Developmental toxicity of naphthalene (CAS no. 91-20-3) in Sprague-Dawley (CD) rats on gestational days 6 through 15. (TER91006). Research Triangle Park, NC. <https://ntrl.ntis.gov/NTRL/dashboard/searchResults.xhtml?searchQuery=PB92135623>

NTP (National Toxicology Program). (1992). NTP technical report on the toxicology and carcinogenesis studies of naphthalene (CAS no. 91-20-3) in B6C3F1 mice (inhalation studies). (NTP TR 410; NIH Publication No. 92-3141). Research Triangle Park, NC. [http://ntp.niehs.nih.gov/ntp/htdocs/LT\\_rpts/tr410.pdf](http://ntp.niehs.nih.gov/ntp/htdocs/LT_rpts/tr410.pdf)

NTP (National Toxicology Program). (2000). NTP technical report on the toxicology and carcinogenesis studies of naphthalene (CAS no. 91-20-3) in F344/N rats (inhalation studies). (NTP TR 500). Research Triangle Park, NC.

NYSDEC (New York State Department of Environmental Conservation). (2006). New York State Brownfield Cleanup Program: Development of soil cleanup objectives: Technical support document. [https://www.dec.ny.gov/docs/remediation\\_hudson\\_pdf/techsuppdoc.pdf](https://www.dec.ny.gov/docs/remediation_hudson_pdf/techsuppdoc.pdf)

OEHHA (California Office of Environmental Health Hazard Assessment). (2000). Chronic toxicity summary - naphthalene (pp. 413-419). Sacramento, CA: California Environmental Protection Agency. <http://oehha.ca.gov/media/downloads/crn/appendixd3final.pdf>

OEHHA (California Office of Environmental Health Hazard Assessment). (2011). Appendix B. Chemical-specific summaries of the information used to derive unit risk and cancer potency values: Naphthalene (pp. 409-431). <https://oehha.ca.gov/media/downloads/crn/appendixb.pdf>

Ontario Ministry of Labour. (2020). Current Occupational Exposure Limits for Ontario Workplaces Required under Regulation 833. Available online at [https://www.labour.gov.on.ca/english/hs/pubs/oel\\_table.php](https://www.labour.gov.on.ca/english/hs/pubs/oel_table.php) (accessed March 17, 2021).

Oregon DEQ (Oregon Department of Environmental Quality). (2018). Ambient Benchmark Concentrations (ABCs): Based on 2014-2017 ATSAC Review. <https://www.oregon.gov/deq/FilterDocs/airtox-abc.pdf>

OSHA (Occupational Safety & Health Administration). (2019). Permissible exposure limits: OSHA annotated table Z-1. Available online at <https://www.osha.gov/dsg/annotated-pels/tablez-1.html> (accessed March 17, 2021).

OSHA (Occupational Safety & Health Administration). (2020a). Air contaminants: Occupational safety and health standards for shipyard employment, subpart Z, toxic and hazardous substances. Available online at [https://www.osha.gov/pls/oshaweb/owadisp.show\\_document?p\\_table=STANDARDS&p\\_id=10286](https://www.osha.gov/pls/oshaweb/owadisp.show_document?p_table=STANDARDS&p_id=10286) (accessed March 17, 2021).

OSHA (Occupational Safety & Health Administration). (2020b). Safety and health regulations for construction: Occupational health and environmental controls: Gases, vapors, fumes, dusts, and mists: Appendix A. Available online at [http://www.osha.gov/pls/oshaweb/owadisp.show\\_document?p\\_table=STANDARDS&p\\_id=10629](http://www.osha.gov/pls/oshaweb/owadisp.show_document?p_table=STANDARDS&p_id=10629) (accessed March 17, 2021).

- Ranjbar, M; Rotondi, MA; Ardern, CI; Kuk, JL. (2015). Urinary biomarkers of polycyclic aromatic hydrocarbons are associated with cardiometabolic health risk. PLoS ONE 10: e0137536. <http://dx.doi.org/10.1371/journal.pone.0137536>
- Reynolds, S. (1997). Naphthalene: Neurotoxicity Study by a Single Oral Gavage Administration to CD Rats Followed by a 14-Day Observation Period: Final Report: Lab Project Number: 96/1140: 96/RCE001/1140: RCE/001. Unpublished study prepared by Huntingdon Life Sciences Ltd. 383 p. (MRID 44282801). Reynolds, S.
- RI DEM (Rhode Island Department of Environmental Management). (2008). Rhode Island Air Toxics Guidelines. <http://www.dem.ri.gov/programs/benviron/air/pdf/airtoxgl.pdf>
- RIVM (National Institute for Public Health and the Environment (Netherlands)). (2001). Re-evaluation of human-toxicological maximum permissible risk levels. (RIVM report 711701025). Bilthoven, Netherlands: National Institute for Public Health and the Environment (RIVM). <https://www.rivm.nl/bibliotheek/rapporten/711701025.pdf>
- Robbins, MC. (1951). Determination of naphthalene in air. Arch Environ Occup Health 4: 85-87.
- Safe Work Australia. (2019). Workplace exposure standards for airborne contaminants. <https://www.safeworkaustralia.gov.au/system/files/documents/1912/workplace-exposure-standards-airborne-contaminants.pdf>
- Schafer, WB. (1951). Acute hemolytic anemia related to naphthalene: Report of a case in a newborn infant. Pediatrics 7: 172-174.
- Scinicariello, F; Buser, MC. (2014). Urinary Polycyclic Aromatic Hydrocarbons and Childhood Obesity: NHANES (2001-2006). Environ Health Perspect 122: 299-303. <http://dx.doi.org/10.1289/ehp.1307234>
- Sodeinde, O; Chan, MC; Maxwell, SM; Familusi, JB; Hendrickse, RG. (1995). Neonatal jaundice, aflatoxins and naphthols: Report of a study in Ibadan, Nigeria. Ann Trop Paediatr 15: 107-113.
- SWCAA (Southwest Clean Air Agency). (2019). SWCAA pollutant details: Naphthalene. Available online at <http://www.swcleanair.org/epages/pollutantdetail.asp?id=2723> (accessed March 17, 2021).
- SWCAA (Southwest Clean Air Agency). (2021). Pollutant search. Available online at <http://www.swcleanair.gov/epages/polsrch.asp> (accessed March 17, 2021).
- TCEQ (Texas Commission on Environmental Quality). (2018). TRRP protective concentration levels: April 2018 PCL and supporting tables. Available online at <https://www.tceq.texas.gov/remediation/trrp/trrppcls.html> (accessed March 17, 2021).
- TCEQ (Texas Commission on Environmental Quality). (2020). Final development support documents (DSDs). Available online at <https://www.tceq.texas.gov/toxicology/dsd/final> (accessed March 17, 2021).
- TERA (Toxicology Excellence for Risk Assessment). (2021). ITER database. Available online at <https://iter.tera.org/> (accessed March 17, 2021).
- Tiesjema, B; Baars, AJ. (2009). Re-evaluation of some human-toxicological Maximum Permissible Risk levels earlier evaluated in the period 1991-2001. (RIVM Report 711701092). Bilthoven, the Netherlands: National Institute for Public Health and the Environment (Netherlands). <http://www.rivm.nl/bibliotheek/rapporten/711701092.pdf>
- U.S. APHC (U.S. Army Public Health Command). (2013). Environmental health risk assessment and chemical exposure guidelines for deployed military personnel. (Technical guide 230, 2013 revision). Aberdeen Proving Ground, MD. <https://phc.amedd.army.mil/PHC%20Resource%20Library/TG230-DeploymentEHRA-and-MEGs-2013-Revision.pdf>
- U.S. EPA (U.S. Environmental Protection Agency). (1993). NATICH Data base report on state, local and epa air toxics activities. (EPA-453/R-93-041). Research Triangle Park, NC. <http://nepis.epa.gov/exe/ZyPURL.cgi?Dockey=2000NS7S.txt>

- U.S. EPA (U.S. Environmental Protection Agency). (1998). Toxicological review of naphthalene (CAS no. 91-20-3) in support of summary information on the Integrated Risk Information System (IRIS). (NTIS/03010276\_a). Washington, DC: Integrated Risk Information System.
- U.S. EPA (U.S. Environmental Protection Agency). (2018a). 2018 Edition of the drinking water standards and health advisories tables. (EPA 822-F-18-001). Washington, DC: Office of Water, U.S. Environmental Protection Agency. <https://www.epa.gov/sites/production/files/2018-03/documents/dwtable2018.pdf>
- U.S. EPA (U.S. Environmental Protection Agency). (2018b). Access Acute Exposure Guideline Levels (AEGs) Values. Available online at <https://www.epa.gov/aegl/access-acute-exposure-guideline-levels-aegls-values#chemicals> (accessed March 17, 2021).
- U.S. EPA (U.S. Environmental Protection Agency). (2018c). Naphthalene: Human health risk assessment in support of registration review. (EPA-HQ-OPP-2016-0113-0018). <https://www.regulations.gov/document?D=EPA-HQ-OPP-2016-0113-0018>
- U.S. EPA (U.S. Environmental Protection Agency). (2020). Dose-response assessment for assessing health risks associated with exposure to hazardous air pollutants. Available online at <https://www.epa.gov/fera/dose-response-assessment-assessing-health-risks-associated-exposure-hazardous-air-pollutants> (accessed March 17, 2021).
- U.S. EPA (U.S. Environmental Protection Agency). (2021a). Integrated Risk Information System (IRIS) database. Available online at <http://www.epa.gov/iris/> (accessed March 17, 2021).
- U.S. EPA (U.S. Environmental Protection Agency). (2021b). Pesticide chemical search. Available online at <https://iaspub.epa.gov/apex/pesticides/f?p=chemicalsearch:1> (accessed March 17, 2021).
- Valaes, T; Doxiadis, SA; Fessas, P. (1963). Acute hemolysis due to naphthalene inhalation. J Paediatr Child Health 63: 904-915. [http://dx.doi.org/10.1016/S0022-3476\(63\)80221-8](http://dx.doi.org/10.1016/S0022-3476(63)80221-8)
- WHO (World Health Organization). (2017). Guidelines for drinking-water quality, 4th edition, incorporating the 1st addendum. <https://www.who.int/publications/i/item/9789241549950>
- WHO (World Health Organization). (2021). Online catalog for the Environmental Health Criteria (EHC) monographs. Available online at <http://www.who.int/ipcs/publications/ehc/en/> (accessed March 17, 2021).
- Worksafe (Worksafe New Zealand). (2018). Workplace exposure standards and biological exposure indices (10 ed.). <https://www.worksafe.govt.nz/topic-and-industry/work-related-health/monitoring/exposure-standards-and-biological-exposure-indices/>
- Zhu, P; Bian, Z; Xia, Y; Han, Y; Qiao, S; Zhao, R; Jin, N; Wang, S; Peng, Y; Wang, X. (2009). Relationship between urinary metabolites of polycyclic aromatic hydrocarbons and thyroid hormone levels in Chinese non-occupational exposure adult males. Chemosphere 77: 883-888. <http://dx.doi.org/10.1016/j.chemosphere.2009.08.054>

## Appendix: Reference Values Identified for Naphthalene

Table A1. Details on derivation of the available health effect reference values for inhalation exposure to naphthalene (from Figure 1 of the main text) (continued on following pages)

|                    | Reference Value Name | Duration | Reference Value      |       | Health Effect          | Point of Departure | Qualifier | Source       | Uncertainty Factors <sup>a</sup> | Notes on Derivation         | Review Status     |
|--------------------|----------------------|----------|----------------------|-------|------------------------|--------------------|-----------|--------------|----------------------------------|-----------------------------|-------------------|
|                    |                      |          | (mg/m <sup>3</sup> ) | (ppm) |                        |                    |           |              |                                  |                             |                   |
| Emergency Response | PAC-3                | 1 hour   | 2,600                | 500   | Adopted previous IDLH  | --                 | --        | NIOSH (1994) | --                               | Adopted previous IDLH       | Final (DOE, 2018) |
|                    | PAC-2                | 1 hour   | 430                  | 83    | Based on PAC-3         | --                 | --        | --           | --                               | Based on PAC-3 <sup>b</sup> |                   |
|                    | PAC-1                | 1 hour   | 79                   | 15    | Adopted NIOSH REL-STEL | --                 | --        | --           | --                               | Adopted NIOSH REL-STEL      |                   |

|                     | Reference Value Name                     | Duration    | Reference Vaue       |       | Health Effect                                                           | Point of Departure | Qualifier | Source                                                                                                                                                                                   | Uncertainty Factors <sup>a</sup> | Notes on Derivation                  | Review Status       |
|---------------------|------------------------------------------|-------------|----------------------|-------|-------------------------------------------------------------------------|--------------------|-----------|------------------------------------------------------------------------------------------------------------------------------------------------------------------------------------------|----------------------------------|--------------------------------------|---------------------|
|                     |                                          |             | (mg/m <sup>3</sup> ) | (ppm) |                                                                         |                    |           |                                                                                                                                                                                          |                                  |                                      |                     |
| <b>Occupational</b> | <b>NIOSH REL (TWA)</b>                   | 10-hour TWA | 50                   | 10    | NR                                                                      | NR                 | NR        |                                                                                                                                                                                          | NR                               |                                      | Final (NIOSH, 1994) |
|                     | <b>NIOSH REL-STEL</b>                    | 15 minutes  | 75                   | 15    | NR                                                                      | NR                 | NR        |                                                                                                                                                                                          | NR                               |                                      |                     |
|                     | <b>NIOSH IDLH</b>                        | 30 minutes  | 1,300                | 250   | Acute oral toxicity                                                     | NR                 | NR        | Gerarde (1960)                                                                                                                                                                           | NR                               | Route-to-route extrapolation applied |                     |
|                     | <b>ACGIH TLV-TWA [Skin]<sup>c</sup></b>  | 8-hour TWA  | 52                   | 10    | Eye irritation at 15 ppm, acute hemolysis, and hepatotoxicity in humans | NR                 | NR        | Robbins (1951)<br>Hanssler (1964)<br>Grigor et al. (1966); Irlle (1964);<br>Naiman and Kosoy (1964);<br>Valaes et al. (1963);<br>Dawson et al. (1958);<br>Cock (1957);<br>Schafer (1951) | NR                               |                                      | Final (ACGIH, 2001) |
|                     | <b>ACGIH TLV-STEL [Skin]<sup>d</sup></b> | 15 minutes  | 79                   | 15    |                                                                         |                    |           |                                                                                                                                                                                          |                                  |                                      |                     |
|                     | <b>OSHA PEL (TWA)<sup>e</sup></b>        | 8-hour TWA  | 50                   | 10    | NR                                                                      | NR                 | NR        |                                                                                                                                                                                          | NR                               |                                      | Final (OSHA, 2019)  |
|                     | <b>Cal-OSHA PEL (TWA)</b>                | 8-hour TWA  | 0.5                  | 0.1   | NR                                                                      | NR                 | NR        |                                                                                                                                                                                          | NR                               |                                      |                     |

|                       | Reference Value Name                           | Duration          | Reference Vaue       |        | Health Effect                                                                                                             | Point of Departure                                       | Qualifier                                             | Source                               | Uncertainty Factors <sup>a</sup>                                                                                 | Notes on Derivation                                                        | Review Status          |
|-----------------------|------------------------------------------------|-------------------|----------------------|--------|---------------------------------------------------------------------------------------------------------------------------|----------------------------------------------------------|-------------------------------------------------------|--------------------------------------|------------------------------------------------------------------------------------------------------------------|----------------------------------------------------------------------------|------------------------|
|                       |                                                |                   | (mg/m <sup>3</sup> ) | (ppm)  |                                                                                                                           |                                                          |                                                       |                                      |                                                                                                                  |                                                                            |                        |
| <b>General Public</b> | <b>U.S. EPA Chronic RfC (IRIS)<sup>f</sup></b> | Chronic           | 0.003                | 0.0006 | Hyperplasia in the respiratory epithelium and metaplasia in the olfactory epithelium of adult male and female mice        | 10 ppm<br>9.3 mg/m <sup>3</sup><br>9.3 mg/m <sup>3</sup> | LOAEL<br>LOAEL <sub>ADJ</sub><br>LOAEL <sub>HEC</sub> | NTP (1992)                           | Total UF = 3,000<br>UF <sub>A</sub> = 10<br>UF <sub>H</sub> = 10<br>UF <sub>L</sub> = 10<br>UF <sub>DB</sub> = 3 | Duration adjusted: (6-h/24-h) × (5-d/7-d)<br><br>HEC Adjusted <sup>g</sup> | Final (U.S. EPA, 1998) |
|                       | <b>ATSDR MRL</b>                               | Chronic (>1 year) | 0.0036               | 0.0007 | Nonneoplastic lesions in nasal olfactory epithelium and respiratory epithelium of adult male and female rats and mice     | 10 ppm<br>1.8 ppm<br>0.2 ppm                             | LOAEL<br>LOAEL <sub>ADJ</sub><br>LOAEL <sub>HEC</sub> | Abdo et al. (2001); NTP (2000, 1992) | Total UF = 300<br>UF <sub>A</sub> = 3<br>UF <sub>H</sub> = 10<br>UF <sub>L</sub> = 10                            | Duration adjusted: (6-h/24-h) × (5-d/7-d)<br><br>HEC Adjusted <sup>h</sup> | Final (ATSDR, 2005)    |
|                       | <b>OEHHA REL<sup>i</sup></b>                   | Chronic           | 0.009                | 0.002  | Nasal inflammation, olfactory epithelial metaplasia, and respiratory epithelial hyperplasia in adult male and female mice | 10 ppm<br>1.8 ppm                                        | LOAEL<br>LOAEL <sub>ADJ</sub>                         | NTP (1992)                           | Total UF = 1,000<br>UF <sub>A</sub> = 10<br>UF <sub>H</sub> = 10<br>UF <sub>L</sub> = 10<br>UF <sub>S</sub> = 1  | Duration adjusted: (6-h/24-h) × (5-d/7-d)                                  | Final (OEHHA, 2000)    |
|                       | <b>MDH HBV</b>                                 | Acute (1 hour)    | 0.2                  | 0.038  | Respiratory cell swelling and sloughing in rats and nausea, vomiting, abdominal pain, and hemolytic anemia in humans      | 204 mg/m <sup>3</sup>                                    | NOAEL                                                 | Buckpitt and Richieri (1984)         | Total UF = 1,000<br>UF <sub>A</sub> = 10<br>UF <sub>H</sub> = 10<br>UF <sub>DB</sub> = 10                        |                                                                            | Final (MDH, 2004)      |



|                                            | Reference Value Name                        | Duration         | Reference Vaue       |           | Health Effect                                                                     | Point of Departure                            | Qualifier                     | Source           | Uncertainty Factors <sup>a</sup>                                                          | Notes on Derivation                                                   | Review Status                   |
|--------------------------------------------|---------------------------------------------|------------------|----------------------|-----------|-----------------------------------------------------------------------------------|-----------------------------------------------|-------------------------------|------------------|-------------------------------------------------------------------------------------------|-----------------------------------------------------------------------|---------------------------------|
|                                            |                                             |                  | (mg/m <sup>3</sup> ) | (ppm)     |                                                                                   |                                               |                               |                  |                                                                                           |                                                                       |                                 |
|                                            |                                             | Chronic (1 year) | 0.009                | 0.002     | Nasal effects in adult rats and mice                                              | 10 ppm<br>9.3 mg/m <sup>3</sup>               | LOAEL<br>LOAEL <sub>ADJ</sub> | NTP (2000, 1992) | Total UF = 1,000<br>UF <sub>A</sub> = 10<br>UF <sub>H</sub> = 10<br>UF <sub>L</sub> = 10  | Duration adjusted: (6-h/24-h) x (5-d/7-d)                             |                                 |
|                                            | <b>RIVM TCA</b>                             | Chronic          | 0.025                | 0.0048    | Local toxic effect on the nasal mucous membrane in adult rats exposed for 28 days | 5 mg/m <sup>3</sup>                           | LOAEL                         | Coombs (1993)    | Total UF = 200<br>UF <sub>A</sub> = 10<br>UF <sub>H</sub> = 10<br>UF <sub>L</sub> = 2     | No time extrapolation<br><br>Based on EU Risk Assessment: (ECB, 2003) | Final (Dusseldorp et al., 2011) |
|                                            | <b>Health Canada Residential Indoor RfC</b> | Chronic          | 0.01                 | 0.0019    | Nasal epithelial cytotoxicity in adult rats                                       | 52 mg/m <sup>3</sup><br>9.3 mg/m <sup>3</sup> | LOAEL<br>LOAEL <sub>ADJ</sub> | NTP (2000)       | Total UF = 1,000<br>UF <sub>A</sub> = 10<br>UF <sub>H</sub> = 10<br>UF <sub>DB</sub> = 10 | Duration adjusted: (6-h/24-h) x (5-d/7-d)                             | Final (Health Canada, 2013)     |
| <b>General Public (Other State Values)</b> | <b>RI DEM AAL</b>                           | 24 hours         | 0.003                | 0.0006    | Adopted IRIS RfC as 24-hr. AAL                                                    | --                                            | --                            | --               | --                                                                                        | Adopted IRIS RfC as 24-hr. AAL                                        | Final (RI DEM, 2008)            |
|                                            |                                             | 1 year           | 0.00003              | 0.0000056 | Cancer                                                                            | 0.000034 (µg/m <sup>3</sup> ) <sup>-1</sup>   | OEHHA Cancer URF              | OEHHA (2011)     | NA                                                                                        | Calculated <sup>j</sup>                                               |                                 |
|                                            | <b>OR DEQ ABC</b>                           | 1 year           | 0.00003              | 0.0000056 | Cancer                                                                            | 0.000034 (µg/m <sup>3</sup> ) <sup>-1</sup>   | OEHHA Cancer URF              | OEHHA (2011)     | NA                                                                                        | Calculated <sup>k</sup>                                               | Final (Oregon DEQ, 2018)        |
|                                            | <b>CT DEEP HLV</b>                          | 30 minutes       | 5                    | 1         | NR                                                                                | NR                                            | NR                            |                  | NR                                                                                        | NA                                                                    | Final (CT DEEP, 2015)           |
|                                            |                                             | 8 hours          | 1                    | 0.2       | NR                                                                                | 52 mg/m <sup>3</sup>                          | ACGIH TLV-TWA                 | ACGIH (1992)     | Total UF = 50                                                                             | Details reported to NATICH                                            |                                 |
| <b>NDEP BCL</b>                            | Chronic (Cancer)                            | 0.0000826        | 0.000016             | Cancer    | 0.000034 (µg/m <sup>3</sup> ) <sup>-1</sup>                                       | OEHHA Cancer URF                              | OEHHA (2011)                  | NA               | Calculated <sup>l</sup>                                                                   | Final (NDEP, 2017)                                                    |                                 |

AAL = Acceptable Ambient Level; ABC = Ambient Benchmark Concentration; ACGIH = American Conference of Governmental Industrial Hygienists; ADJ = adjusted; ATSDR = Agency for Toxic Substances and Disease Registry; BCL = Basic Comparison Level; Cal-OSHA = California Division of Occupational Safety and Health; CT DEEP = Connecticut Department of Energy and Environmental Protection; DOE = Department of Energy; ECB = European Chemicals Bureau; EU = European Union; HBV = Health-Based Value; HEC = human equivalent concentration; HLV = Hazard Limiting Value; IDLH = Immediately Dangerous to Life and Health; IRIS = Integrated Risk

Information System; LOAEL = lowest-observed-adverse-effect level; MDH = Minnesota Department of Health; MRL = Minimal Risk Level; NA = Not applicable; NATICH = National Air Toxics Information Clearinghouse; NDEP = Nevada Division of Environmental Protection; NIOSH = National Institute for Occupational Safety and Health; NOAEL = no-observed-adverse-effect level; NR = Not reported; NTP = National Toxicology Program; OEHHA = California Environmental Protection Agency Office of Environmental Health Hazard Assessment; OR DEQ = Oregon Department of Environmental Quality; OSHA = Occupational Safety and Health Administration; PAC = Protective Action Criteria; PEL = Permissible Exposure Limit; REL = Recommended Exposure Limit (NIOSH) or Reference Exposure Level (OEHHA); RfC = Reference Concentration; RI DEM = Rhode Island Department of Environmental Management; RIVM = *Rijksinstituut voor Volksgezondheid en Milieu*, The Netherlands Institute for Public Health and the Environment; STEL = Short-term Exposure Limit; TCA = Tolerable Concentration; TLV = Threshold Limit Value; TWA = Time-weighted average; UF = uncertainty factor; UF<sub>H</sub> = inter-human variability; UF<sub>A</sub> = animal to human variability; UF<sub>L</sub> = LOAEL to NOAEL adjustment; UF<sub>S</sub> = subchronic to chronic adjustment; UF<sub>DB</sub> = database uncertainty; URF = unit risk factor; U.S. EPA = United States Environmental Protection Agency

<sup>a</sup> “Uncertainty factors” refer to modifying factors and other adjustment factors used by some organizations or in older EPA assessments.

<sup>b</sup> PAC-2 = PAC-3 / 6 = 500 ppm / 6 = 83 ppm

<sup>c</sup> Support documentation states: “systemic poisoning following dermal contact and absorption of naphthalene warrants a Skin notation.”

Agencies of Ontario, Quebec, Ireland, Australia, New Zealand, Austria, Belgium, Spain, and Singapore report identical values.

<sup>d</sup> Agencies of Quebec, Australia, New Zealand, Belgium, China, Singapore, South Korea, Spain, Sweden, and the Netherlands report identical values.

<sup>e</sup> Agencies of Denmark, France, Hungary, Italy, Latvia, China, Romania, South Korea, Sweden, Switzerland, the Netherlands, and Turkey report identical values.

<sup>f</sup> The EPA IRIS RfC has been adopted as a state value by the Texas Commission on Environmental Quality, Indiana Department of Environmental Management, Pennsylvania Department of Environmental Protection, Alaska Department of Environmental Conservation, New Jersey Department of Environmental Protection, and Michigan Department of Environment, Great Lakes & Energy.

<sup>g</sup> LOAEL<sub>HEC</sub> = LOAEL<sub>ADJ</sub> × RGDR = 9.3 mg/m<sup>3</sup> × 1 = 9.3 mg/m<sup>3</sup>

<sup>h</sup> LOAEL<sub>HEC</sub> = LOAEL<sub>ADJ</sub> × RGDR = 1.8 ppm × 0.132 = 0.2 ppm

<sup>i</sup> The OEHHA REL value has been adopted by New York DEC

<sup>j</sup> AAL = 1 / URF / 10<sup>6</sup> = 1 / 0.000034 (μg/m<sup>3</sup>)<sup>-1</sup> / 10<sup>6</sup> = 0.03 μg/m<sup>3</sup>

<sup>k</sup> ABC = 1 / URF / 10<sup>6</sup> = 1 / 0.000034 (μg/m<sup>3</sup>)<sup>-1</sup> / 10<sup>6</sup> = 0.03 μg/m<sup>3</sup>

<sup>l</sup> BCL = TR × AT / (ET × EF × ED × URF) = (10<sup>-6</sup> × 70 yrs. × 365 days/yr. × 24 hrs./day) / [24 hrs./day × 350 days/yr. × 26 yrs. × 0.000034 (μg/m<sup>3</sup>)<sup>-1</sup>] = 0.0826 μg/m<sup>3</sup>

**Table A2. Details on derivation of the available health effect reference values for oral exposure to naphthalene (from Figure 2 of the main text)**

|                             | Reference Value Name                   | Duration                   | Reference Value (mg/kg-day)                                                                                | Health Effect                                                                                      | Point of Departure            | Qualifier                                      | Source          | Uncertainty Factors <sup>a</sup>                                                                                 | Notes on Derivation        | Review Status           |
|-----------------------------|----------------------------------------|----------------------------|------------------------------------------------------------------------------------------------------------|----------------------------------------------------------------------------------------------------|-------------------------------|------------------------------------------------|-----------------|------------------------------------------------------------------------------------------------------------------|----------------------------|-------------------------|
| <b>General Public</b>       | <b>U.S. EPA RfD (IRIS)<sup>b</sup></b> | Chronic                    | 0.02                                                                                                       | Decreased body wt. in adult in male rats exposed 13 weeks.                                         | 100 mg/kg-day<br>71 mg/kg-day | NOAEL<br>NOAEL <sub>ADJ</sub>                  | NTP (1980)      | Total UF = 3,000<br>UF <sub>A</sub> = 10<br>UF <sub>H</sub> = 10<br>UF <sub>S</sub> = 10<br>UF <sub>DB</sub> = 3 | Duration adjusted: 5-d/7-d | Final (U.S. EPA, 1998)  |
|                             | <b>U.S. EPA RfD (OPP)<sup>c</sup></b>  | Acute                      | 0.4                                                                                                        | Neurotoxicity in adult male and female rats, such as head shaking and reduced motor activity       | 400 mg/kg-day                 | LOAEL                                          | Reynolds (1997) | Total UF = 1,000<br>UF <sub>A</sub> = 10<br>UF <sub>H</sub> = 10<br>UF <sub>L</sub> = 10                         |                            | Final (U.S. EPA, 2018c) |
|                             |                                        | Chronic                    | 0.1                                                                                                        | Renal toxicity in adult male rats and decreased body weight in males and females exposed 13 weeks. | 100 mg/kg-day                 | NOAEL                                          | NTP (1980)      | Total UF = 1,000<br>UF <sub>A</sub> = 10<br>UF <sub>H</sub> = 10<br>UF <sub>S</sub> = 10                         |                            |                         |
|                             | <b>ATSDR MRL</b>                       | Acute (1-14 days)          | 0.6                                                                                                        | Transient clinical toxicity in pregnant rats exposed on GD 6-15                                    | 50 mg/kg-day                  | LOAEL                                          | NTP (1991)      | Total UF = 90<br>UF <sub>A</sub> = 10<br>UF <sub>H</sub> = 3<br>UF <sub>L</sub> = 3                              |                            | Final (ATSDR, 2005)     |
|                             |                                        | Intermediate (15-365 days) | 0.6                                                                                                        |                                                                                                    |                               |                                                |                 |                                                                                                                  |                            |                         |
| <b>RIVM TDI<sup>d</sup></b> | Chronic                                | 0.04                       | Decreased body wt. and increased kidney and liver wt. in laboratory animals (further details not provided) | NR                                                                                                 | NR                            | Edwards et al. (1997); Gustafson et al. (1997) | NR              | Based on TPHCWG approach                                                                                         | Final (RIVM, 2001)         |                         |

ADJ = adjusted; ATSDR = Agency for Toxic Substances and Disease Registry; GD = Gestation day; IRIS = Integrated Risk Information System; LOAEL = lowest-observed-adverse-effect level; MRL = Minimal Risk Level; NOAEL = no-observed-adverse-effect level; NR = Not reported; OPP = Office of Pesticide Programs; RfD = Reference Dose; RIVM = *Rijksinstituut voor Volksgezondheid en Milieu*; TDI = Tolerable Daily Intake; TPHCWG = Total Petroleum Hydrocarbon Criteria Working Group; UF = uncertainty factor; UF<sub>H</sub> = inter-human variability; UF<sub>A</sub> = animal to human variability; UF<sub>L</sub> = LOAEL to NOAEL adjustment; UF<sub>S</sub> = subchronic to chronic adjustment; UF<sub>DB</sub> = database uncertainty; U.S. EPA = U.S. Environmental Protection Agency

<sup>a</sup> “Uncertainty factors” refer to modifying factors and other adjustment factors used by some organizations or in older EPA assessments.

<sup>b</sup> The U.S. EPA IRIS RfD has been adopted by the Office of Water, Health Canada, Alaska Department of Environmental Conservation, Pennsylvania Department of Environmental Protection, Connecticut Department of Energy & Environmental Protection, Nevada Division of Environmental Protection, New York State Department of Environmental Conservation, and Texas Commission on Environmental Quality.

<sup>c</sup> The U.S. EPA OPP chronic RfD has been adopted as a state value by Michigan Department of Environment, Great Lakes & Energy.

<sup>d</sup> The RIVM TDI value applies individually to non-carcinogenic polycyclic aromatic hydrocarbons “with equivalent carbon numbers of >9-16 (i.e., anthracene, fluorene and naphthalene).”

**Table A3. Details on additional inhalation values based on another agency's values or lacking derivation descriptions  
(continued on following pages)**

|                                     | Reference Value Name                             | Duration   | Reference Value      |        | Health Effect          | Point of Departure | Qualifier | Source     | Uncertainty Factors <sup>a</sup>    | Notes on Derivation | Review Status           |
|-------------------------------------|--------------------------------------------------|------------|----------------------|--------|------------------------|--------------------|-----------|------------|-------------------------------------|---------------------|-------------------------|
|                                     |                                                  |            | (mg/m <sup>3</sup> ) | (ppm)  |                        |                    |           |            |                                     |                     |                         |
| <b>Special Use</b>                  | <b>USAPHC MEG – Critical (MEG-C)</b>             | 1 hour     | 1,300                | 250    | Adopted 2009 PAC-3     | --                 | --        | DOE (2009) | --                                  | Adopted 2009 PAC-3  | Final (U.S. APHC, 2013) |
|                                     | <b>USAPHC MEG – Marginal (MEG-M)</b>             | 1 hour     | 75                   | 15     | Adopted 2009 PAC-2     | --                 | --        |            | --                                  | Adopted 2009 PAC-2  |                         |
|                                     | <b>USAPHC MEG – Negligible (MEG-N)</b>           | 1 hour     | 75                   | 15     | Adopted 2009 PAC-1     | --                 | --        |            | --                                  | Adopted 2009 PAC-1  |                         |
|                                     |                                                  | 8 hours    | 52                   | 10     | Adopted ACGIH TLV-TWA  | --                 | --        | --         | Adopted ACGIH TLV-TWA               |                     |                         |
|                                     |                                                  | 14 days    | 18                   | 3.5    | Based on ACGIH TLV-TWA | --                 | --        | --         | Based on ACGIH TLV-TWA <sup>b</sup> |                     |                         |
|                                     |                                                  | 1 year     | 0.0021               | 0.0004 | Based on IRIS RfC      | --                 | --        | --         | Based on IRIS RfC <sup>c</sup>      |                     |                         |
| <b>Occupational (International)</b> | <b>Finland Limit Value</b>                       | 15 minutes | 10                   | 2      | NR                     | NR                 | NR        |            | NR                                  | Final (IFA, 2020)   |                         |
|                                     |                                                  | 8-hour TWA | 5                    | 1      |                        |                    |           |            |                                     |                     |                         |
|                                     | <b>Denmark Limit Value</b>                       | Short-term | 100                  | 20     | NR                     | NR                 | NR        |            | NR                                  |                     |                         |
|                                     | <b>Interdepartmental Commission MAC (Poland)</b> | 15 minutes | 50                   | 10     | NR                     | NR                 | NR        |            | NR                                  |                     |                         |
|                                     |                                                  | 8-hour TWA | 20                   | 3.8    |                        |                    |           |            |                                     |                     |                         |

|                                  | Reference Value Name <sup>a</sup>               | Duration | Reference Value      |           | Health Effect <sup>b</sup> | Point of Departure <sup>b</sup> | Qualifier <sup>b</sup> | Source       | Uncertainty Factors <sup>b</sup> | Notes on Derivation                                              | Review Status                              |
|----------------------------------|-------------------------------------------------|----------|----------------------|-----------|----------------------------|---------------------------------|------------------------|--------------|----------------------------------|------------------------------------------------------------------|--------------------------------------------|
|                                  |                                                 |          | (mg/m <sup>3</sup> ) | (ppm)     |                            |                                 |                        |              |                                  |                                                                  |                                            |
| General Public (Limited Details) | ID DEQ AAC                                      | 24 hours | 2.5                  | 0.48      | NR                         | NR                              | NR                     |              | NR                               |                                                                  | Final (Idaho DEQ, 2019)                    |
|                                  | VT DEC HAAS                                     | 1 year   | 0.0003               | 0.000056  | NR                         | NR                              | NR                     |              | NR                               |                                                                  | Final (VT ANR, 2018)                       |
|                                  | Washington State Dept. of Ecology ASIL          | 1 year   | 0.0000294            | 0.0000056 | NR                         | NR                              | NR                     |              | NR                               |                                                                  | Final (Washington State Legislature, 2009) |
|                                  | SWCAA ASIL                                      | 24 hours | 0.17                 | 0.033     | NR                         | NR                              | NR                     |              | NR                               | Adopted 1998 Washington State ASIL                               | Final (SWCAA, 2019)                        |
|                                  | MassDEP TEL <sup>d</sup>                        | 24 hours | 0.01425              | 0.00272   | NR                         | NR                              | NR                     |              | NR                               | Values derived in accordance with this protocol: (MassDEP, 2011) | Final (MassDEP, 2019)                      |
|                                  | MassDEP AAL <sup>d</sup>                        | 1 year   | 0.01425              | 0.00272   | NR                         | NR                              | NR                     |              | NR                               |                                                                  |                                            |
|                                  | ADEQ AQG                                        | 1 hour   | 0.63                 | 0.12      | Based on ACGIH TLV-STEL    | --                              | --                     | --           | --                               | Based on ACGIH TLV-STEL <sup>e</sup>                             | Final (U.S. EPA, 1993) <sup>g</sup>        |
|                                  |                                                 | 24 hours | 0.4                  | 0.077     | Based on ACGIH TLV-TWA     | --                              | --                     | --           | --                               | Based on ACGIH TLV-TWA <sup>f</sup>                              |                                            |
|                                  | Broward County ONRP AAC <sup>h</sup>            | 8 hours  | 0.5                  | 0.096     | NR                         | 52 mg/m <sup>3</sup>            | ACGIH TLV-TWA          | ACGIH (1992) | Total UF <sup>i</sup> = 100      |                                                                  |                                            |
|                                  | Pinellas County Air Pollution Control Board AAC | 24 hours | 0.12                 | 0.023     | NR                         | NR                              | NR                     |              | NR                               |                                                                  |                                            |

|                                            |            |       |        |                        |                      |                |              |                            |                                     |
|--------------------------------------------|------------|-------|--------|------------------------|----------------------|----------------|--------------|----------------------------|-------------------------------------|
| <b>ME DEP AAL</b>                          | 15 minutes | 7.9   | 1.52   | NR                     | NR                   | NR             |              | NR                         |                                     |
|                                            | 24 hours   | 0.87  | 0.17   |                        |                      |                |              |                            |                                     |
|                                            | 1 year     | 0.014 | 0.0027 |                        |                      |                |              |                            |                                     |
| <b>ND Dept. of Health ACG</b>              | 1 hour     | 0.79  | 0.15   | NR                     | 79 mg/m <sup>3</sup> | ACGIH TLV-STEL | ACGIH (1992) | Total UF = 100             |                                     |
|                                            | 8 hours    | 0.52  | 0.1    | NR                     | 52 mg/m <sup>3</sup> | ACGIH TLV-TWA  |              |                            |                                     |
| <b>NDEP AAC</b>                            | 8 hours    | 1.19  | 0.23   | NR                     | 52 mg/m <sup>3</sup> | ACGIH TLV-TWA  | ACGIH (1992) | Total UF = 42              |                                     |
| <b>NY DEC AAL</b>                          | 1 year     | 0.167 | 0.032  | NR                     | 52 mg/m <sup>3</sup> | ACGIH TLV-TWA  | ACGIH (1992) | Total UF = 300             |                                     |
| <b>OK Dept. of Health AAC</b>              | 24 hours   | 50    | 10     | NR                     | NR                   | NR             |              | Total UF <sup>j</sup> = 50 | Based on occupational values        |
| <b>SC DHEC AAL</b>                         | 24 hours   | 1.25  | 0.24   | NR                     | 52 mg/m <sup>3</sup> | ACGIH TLV-TWA  | ACGIH (1992) | Total UF = 40              |                                     |
| <b>TX Air Control Board AAC</b>            | 30 minutes | 0.44  | 0.085  | NR                     | NR                   | NR             |              | NR                         |                                     |
|                                            | 1 year     | 0.05  | 0.01   |                        |                      |                |              |                            |                                     |
| <b>VA Air Pollution Control AAC</b>        | 24 hours   | 0.87  | 0.17   | NR                     | 52 mg/m <sup>3</sup> | ACGIH TLV-TWA  | ACGIH (1992) | Total UF <sup>k</sup> = 60 |                                     |
| <b>WI DNR Bureau of Air Management AQG</b> | 24 hours   | 1.2   | 0.23   | Based on ACGIH TLV-TWA | --                   | --             |              | --                         | Based on ACGIH TLV-TWA <sup>l</sup> |

AAC = Acceptable Ambient Concentration; AAL = Allowable Ambient Limit; ACG = Ambient Concentration Guideline; ACGIH = American Conference of Governmental Industrial Hygienists; ADEQ = Arizona Department of Environmental Quality; AQG = Air Quality Guideline; ASIL = Acceptable Source Impact Level; HAAS = Hazardous Ambient Air Standard; ID DEQ = Idaho Department of Environmental Quality; IRIS = Integrated Risk Information System; MAC = Maximum Admissible Concentration; MassDEP = Massachusetts Department of Environmental Protection; ME DEP = Maine Department of Environmental Protection; MEG = Military Exposure Guidelines; ND = North Dakota; NDEP = Nevada Division of Environmental Protection; NR = Not reported; NY DEC = New York Department of Environmental Conservation; OK = Oklahoma; ONRP = Office of Natural Resource Protection; PAC = Protective Action Criteria; RfC = Reference Concentration ; SC DHEC = South Carolina Department of Health and Environmental Control; STEL = Short-term Exposure Limit; SWCAA = Southwest Clean Air Agency; TEL = Threshold Effects Exposure Limit; TLV = Threshold Limit Value; TWA = Time-weighted average; TX = Texas; UF = uncertainty factor; USAPHC = United States Army Public Health Center; VA = Virginia; VT DEC = Vermont Department of Environmental Conservation; WI DNR = Wisconsin Department of Natural Resources

<sup>a</sup> “Uncertainty factors” refer to modifying factors and other adjustment factors used by some organizations or in older EPA assessments.

<sup>b</sup>  $MEG = TLV \times (IR_{Occupational} / IR_{Military}) = 52 \times (10 \text{ m}^3/\text{day} / 29.2 \text{ m}^3/\text{day}) = 18 \text{ mg}/\text{m}^3$

<sup>c</sup>  $MEG = RfC \times (IR_{General \text{ pop.}} / IR_{Military}) = 0.003 \text{ mg}/\text{m}^3 \times (20 \text{ m}^3/\text{day} / 29.2 \text{ m}^3/\text{day}) = 0.0021 \text{ mg}/\text{m}^3$

<sup>d</sup> MassDEP TEL and AAL values apply to the sum of naphthalene and 2-methylnaphthalene.

<sup>e</sup> 1-hr. AQG =  $TLV / 120 = 79 \text{ mg}/\text{m}^3 / 120 = 0.63 \text{ mg}/\text{m}^3$

<sup>f</sup> 24-hr. AQG =  $TLV / 126 = 52 \text{ mg}/\text{m}^3 / 126 = 0.4 \text{ mg}/\text{m}^3$

<sup>g</sup> This document was compiled by the U.S. Environmental Protection Agency in 1993. Values from this document may have since been archived or updated by the state agencies which reported them.

<sup>h</sup> The Hillsborough Co. Environmental Protection Commission and Pinellas County Air Control Board report the same value.

<sup>i</sup> A factor of 100 is applied “for category A substances.”

<sup>j</sup> A factor of 50 is applied for category B substances.

<sup>k</sup> A factor of 60 is applied for non-carcinogens.

<sup>l</sup> 24-hr. AQG =  $TLV \times 0.024 = 52 \text{ mg}/\text{m}^3 \times 0.024 = 1.2 \text{ mg}/\text{m}^3$
