# Supplementary material
Source: PubMed Central journal article supplement (PMC8274693)
Supplement: ehp7381.smcontents.508.pdf [file ehp7381.smcontents.508.pdf]

**Note to readers with disabilities:** *EHP* strives to ensure that all journal content is accessible to all readers. However, some figures and Supplemental Material published in *EHP* articles may not conform to [508 standards](#) due to the complexity of the information being presented. If you need assistance accessing journal content, please contact [ehp508@niehs.nih.gov](mailto:ehp508@niehs.nih.gov). Our staff will work with you to assess and meet your accessibility needs within 3 working days.

### **Supplemental Material**

#### **Health Effects of Naphthalene Exposure: A Systematic Evidence Map and Analysis of Potential Considerations for Dose–Response Evaluation**

Erin E. Yost, Audrey Galizia, Dustin F. Kapraun, Amanda S. Persad, Suryanarayana V. Vulimiri, Michelle Angrish, Janice S. Lee, and Ingrid L. Druwe

#### **Table of Contents**

##### **Survey of existing reference values for naphthalene**

**Table S1.** Sources searched for naphthalene health effect reference values.

##### **Literature search and screening**

**Table S2.** Database search strategy.

**Table S3.** Processes used to augment the search of core databases for naphthalene.

**Table S4.** Electronic screening inclusion terms for naphthalene (listed alphabetically by organ/health system).

##### **Study evaluation methods**

**Table S5.** Questions to guide the development of criteria for each domain in epidemiology studies.

**Table S6.** Information relevant to evaluation domains for epidemiology studies.

**Table S7.** Questions to guide the development of criteria for each domain in experimental animal toxicology studies.

##### **Epidemiology studies reporting on other health systems**

**Table S8.** Summary of eight human studies that did not report any of the health systems selected for further evaluation. These studies did not undergo study evaluation.

### **Appendix: Reference Values Identified for Naphthalene**

**Table A1.** Details on derivation of the available health effect reference values for inhalation exposure to naphthalene (from Figure 1 of the main text) (continued on following pages).

**Table A2.** Details on derivation of the available health effect reference values for oral exposure to naphthalene (from Figure 2 of the main text).

**Table A3.** Details on additional inhalation values based on another agency's values or lacking derivation descriptions (continued on following pages).

### **References**

**Additional File-** Excel Document
